# Supplementary material for: Using Transcriptome Analysis to Explore Gray Mold Resistance-Related Genes in Onion (Alliumcepa L.)
Source: MDPI journal article supplement (doi:10.3390/genes13030542), 2022-03-18
Supplement: s1 [file s1]

Supplementary materials

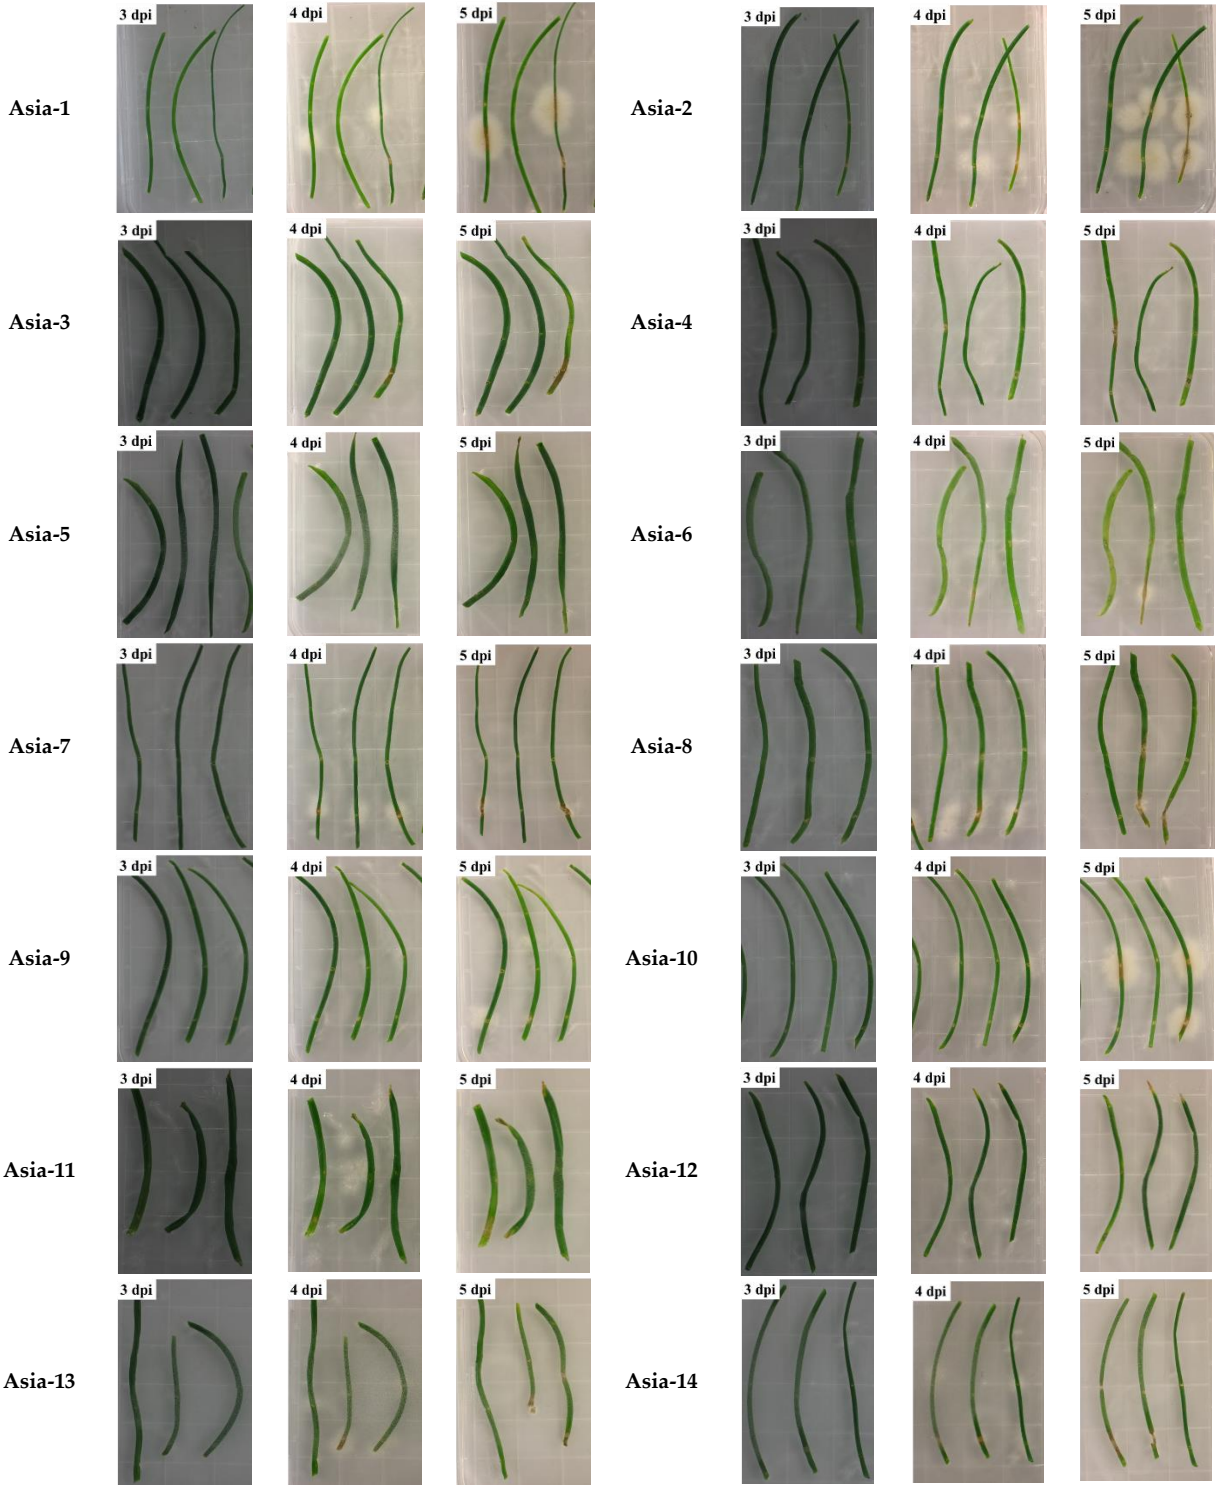

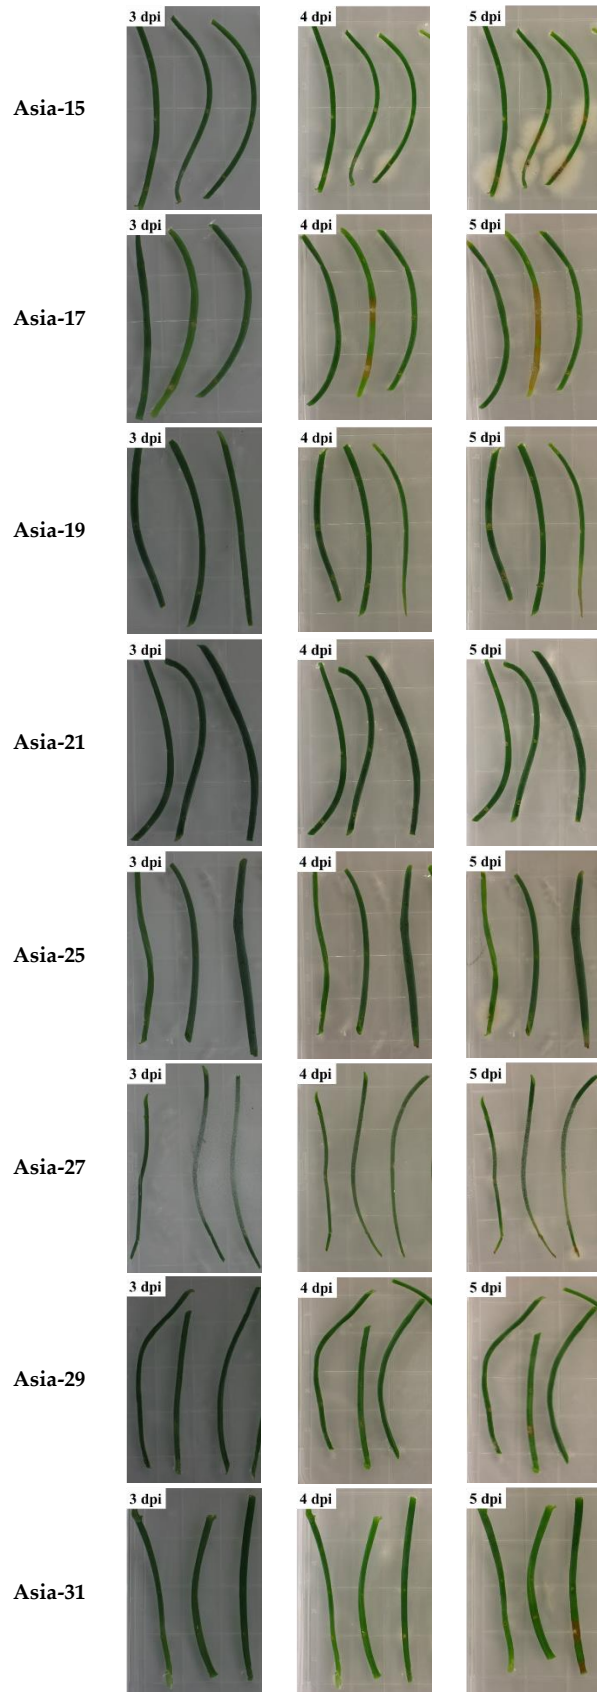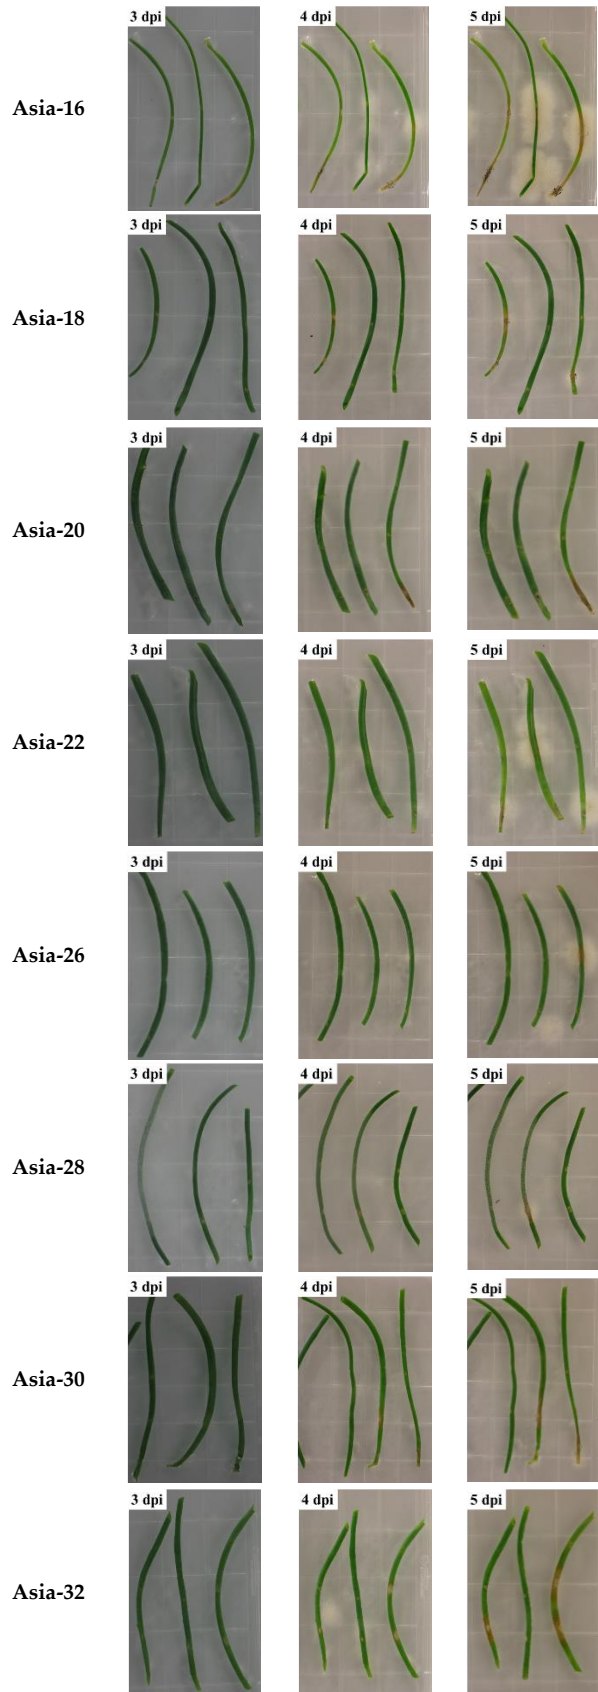

Asia-33

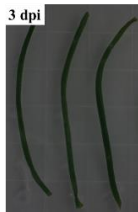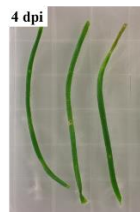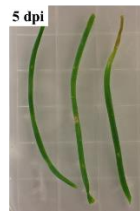

Asia-34

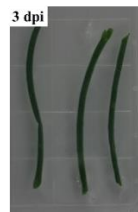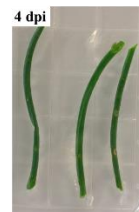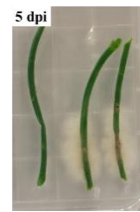

Asia-35

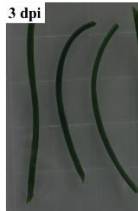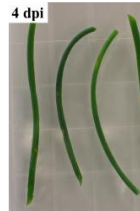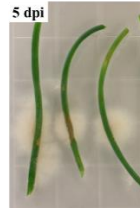

Asia-36

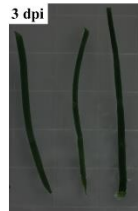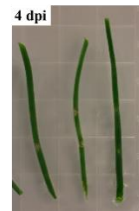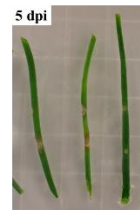

Asia-37

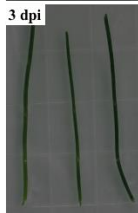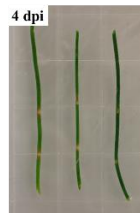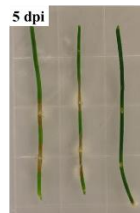

Asia-38

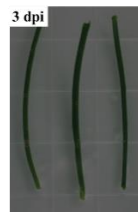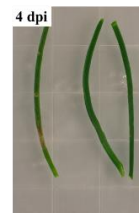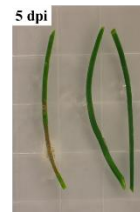

Asia-39

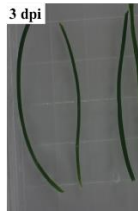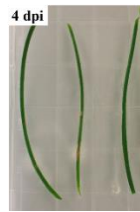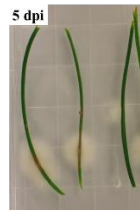

Asia-40

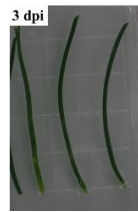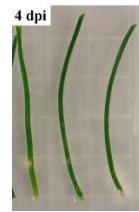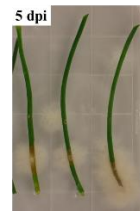

Asia-41

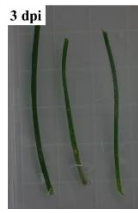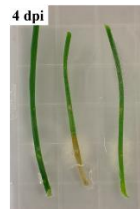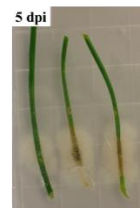

Asia-42

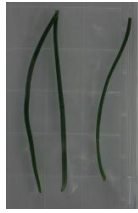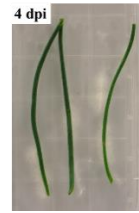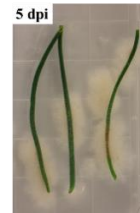

Asia-43

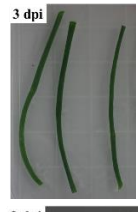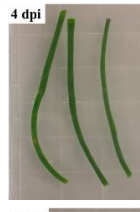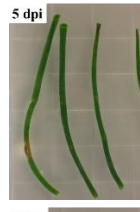

Asia-44

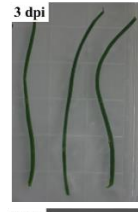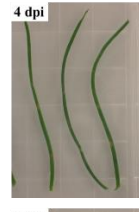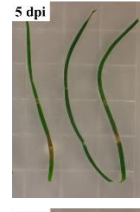

Asia-45

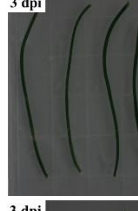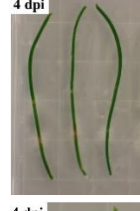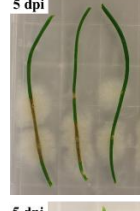

Asia-46

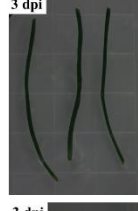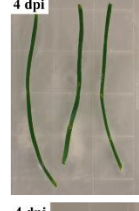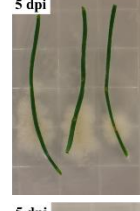

Asia-47

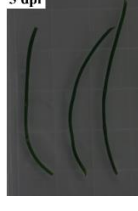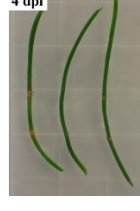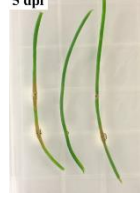

Asia-48

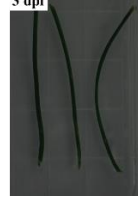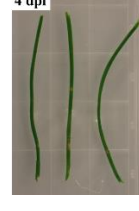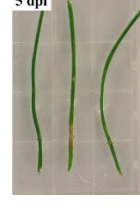



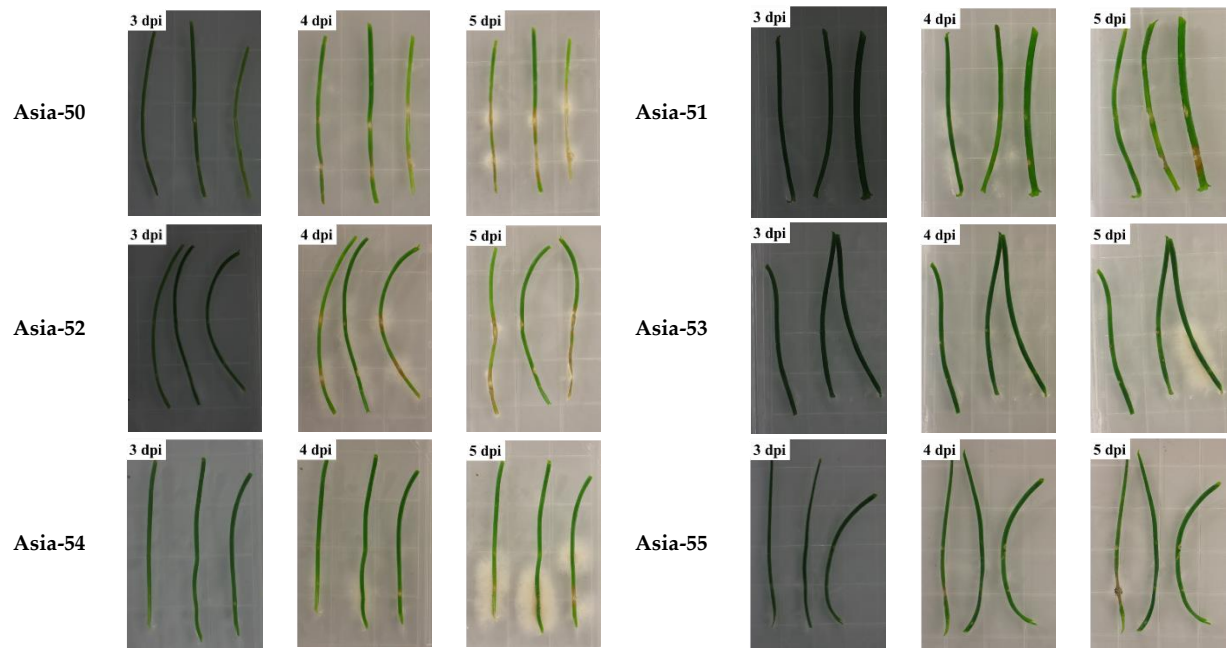

**Figure S1.** *In vitro* inoculation for screening gray mold resistant and susceptible onion lines using detached onion leaves and conidia of *B. squamosa*. A representative image of lesion appearance in inoculated leaves were taken at 3 – 5 days post inoculation (dpi).

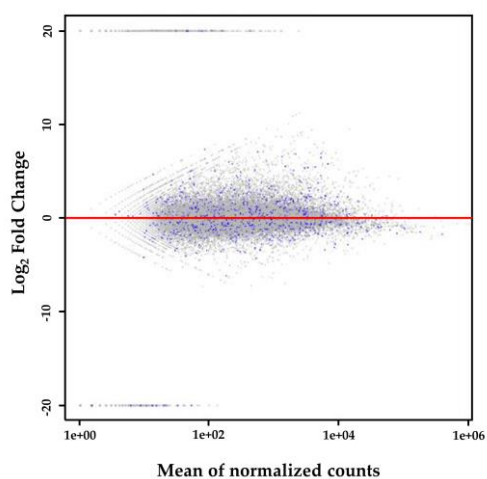

**Asia-23 0 hpi vs 4 hpi**

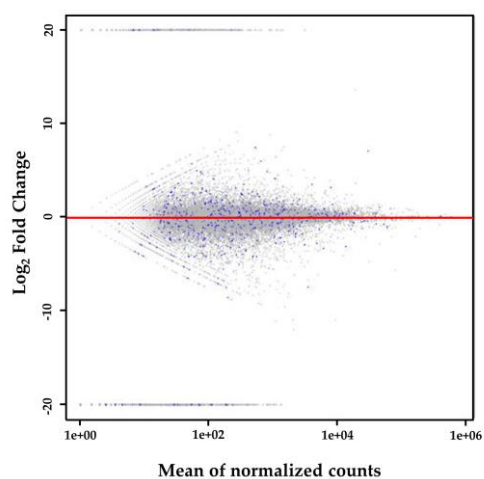

**Asia-24 0 hpi vs 4 hpi**

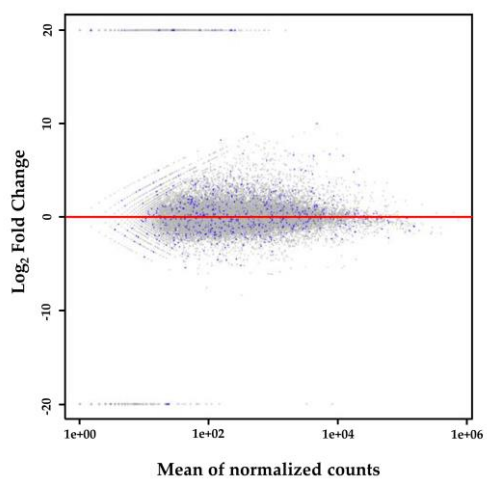

**Asia-23 0 hpi vs 8 hpi**

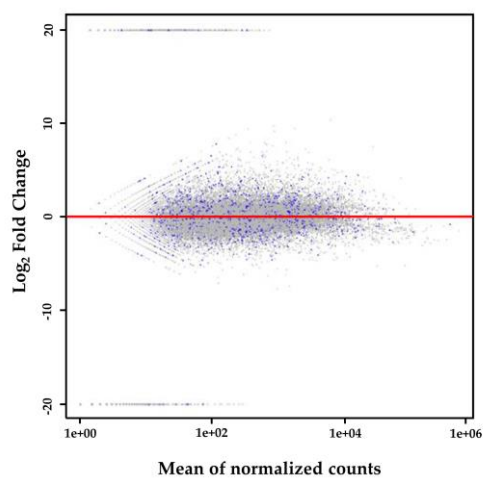

**Asia-24 0 hpi vs 8 hpi**

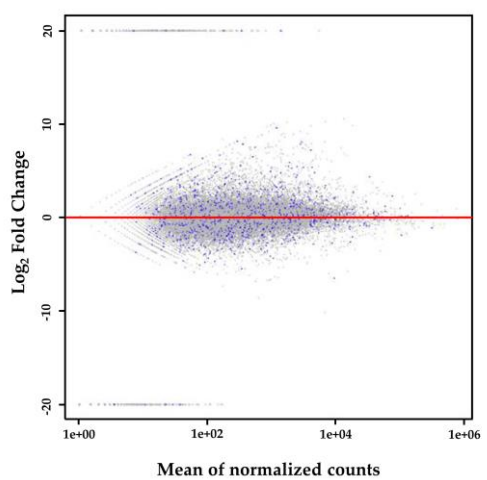

**Asia-23 0 hpi vs 16 hpi**

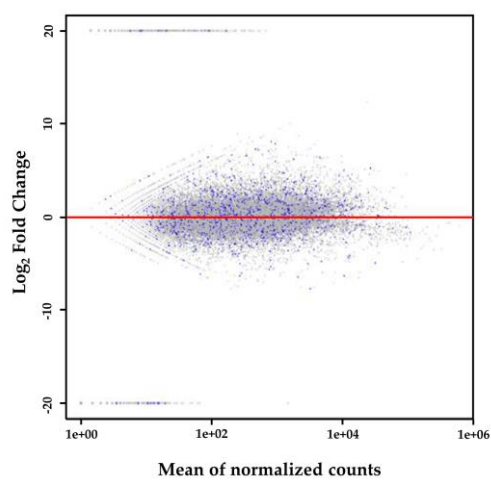

**Asia-24 0 hpi vs 16 hpi**

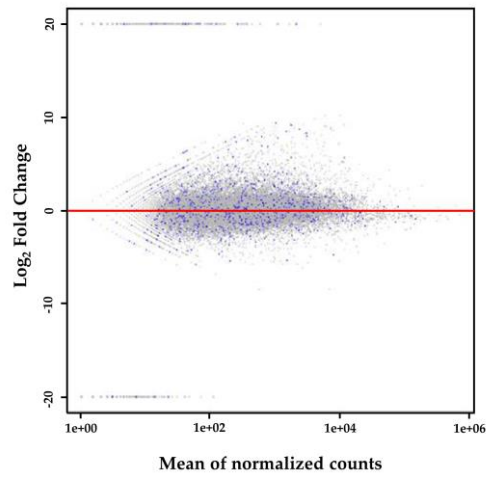

**Asia-23 0 hpi vs 24 hpi**

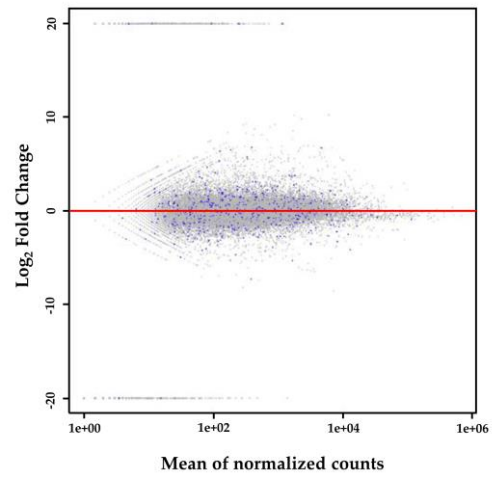

**Asia-24 0 hpi vs 24 hpi**

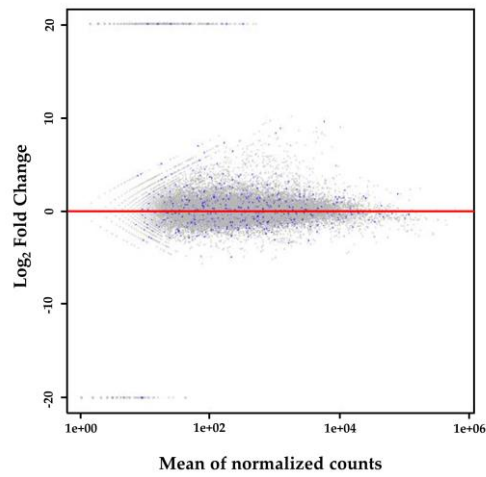

**Asia-23 0 hpi vs 32 hpi**

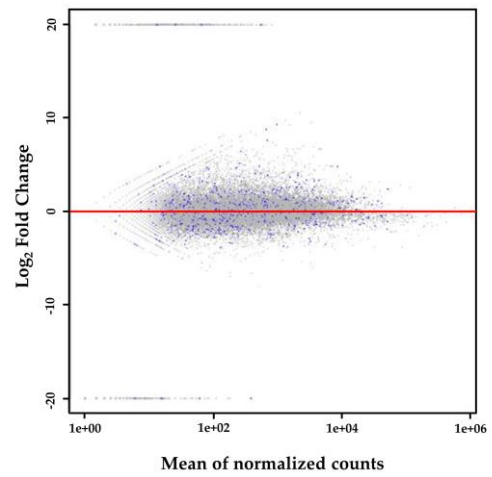

**Asia-24 0 hpi vs 32 hpi**

**Figure S2.** Differentially expressed gene (DEG) results expressed as MA plot. In the MA plot, transcripts of significantly upregulated or downregulated genes in each comparative analysis ( $p < 0.01$ ) are indicated with blue dots. hpi: hours post inoculation.

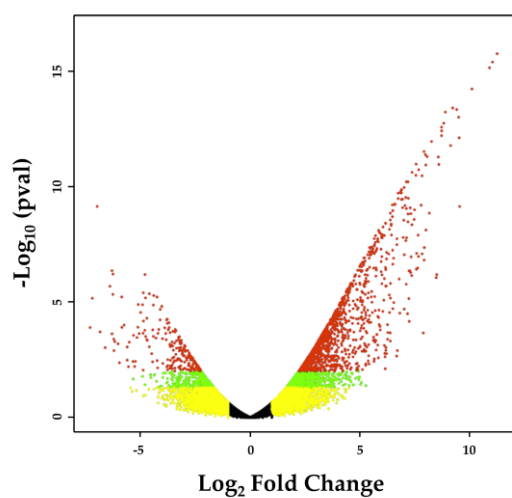

**Asia-23 0 hpi vs 4 hpi**

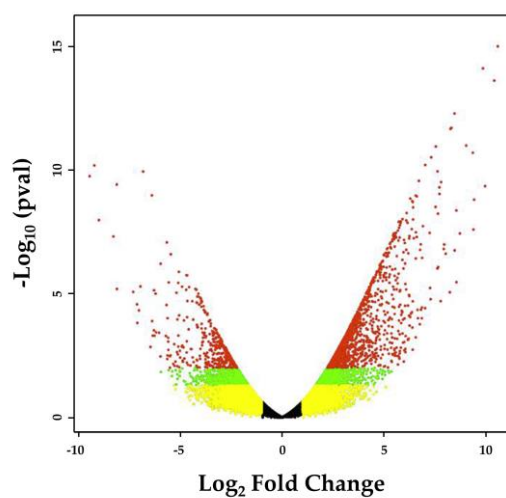

**Asia-24 0 hpi vs 4 hpi**

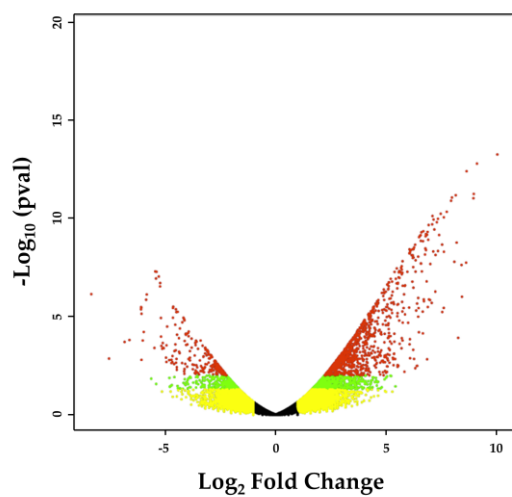

**Asia-23 0 hpi vs 8 hpi**

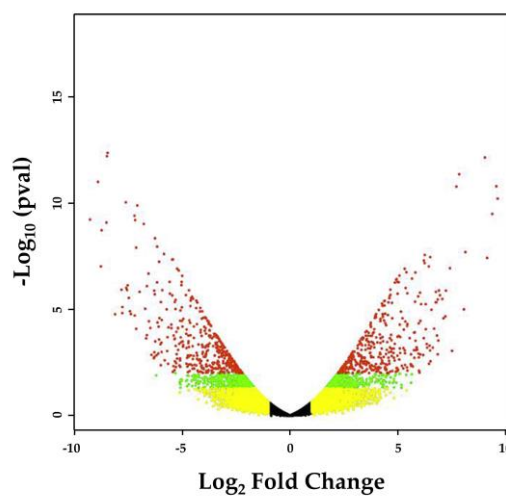

**Asia-24 0 hpi vs 8 hpi**

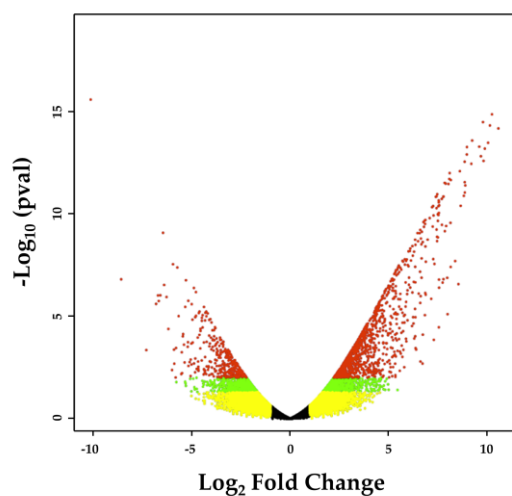

**Asia-23 0 hpi vs 16 hpi**

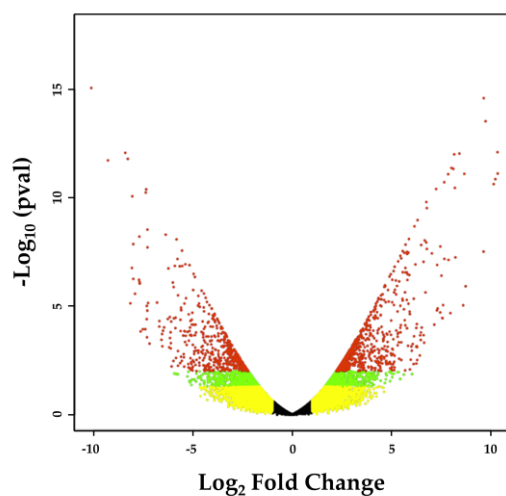

**Asia-24 0 hpi vs 16 hpi**

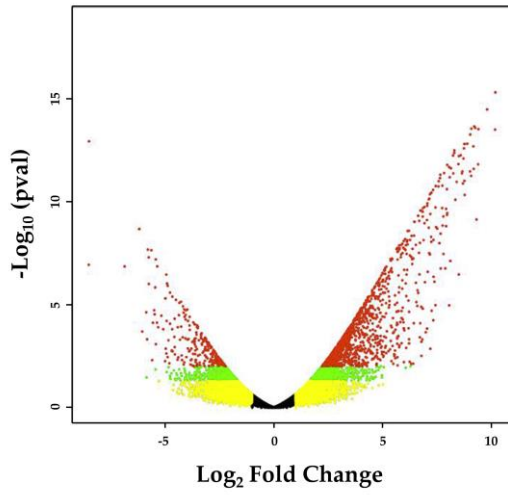

**Asia-23 0 hpi vs 24 hpi**

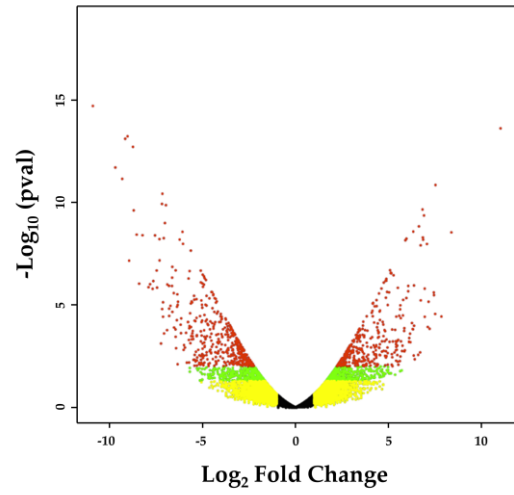

**Asia-24 0 hpi vs 24 hpi**

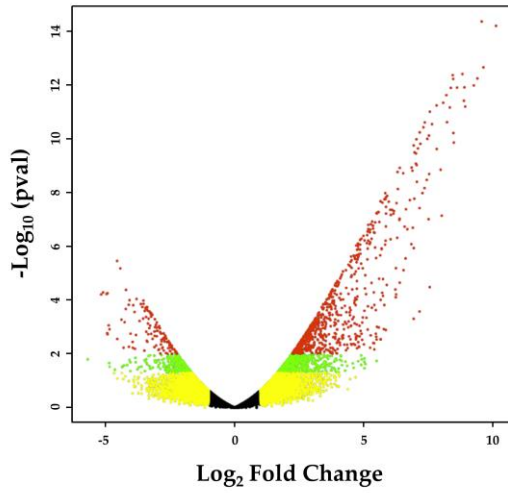

**Asia-23 0 hpi vs 32 hpi**

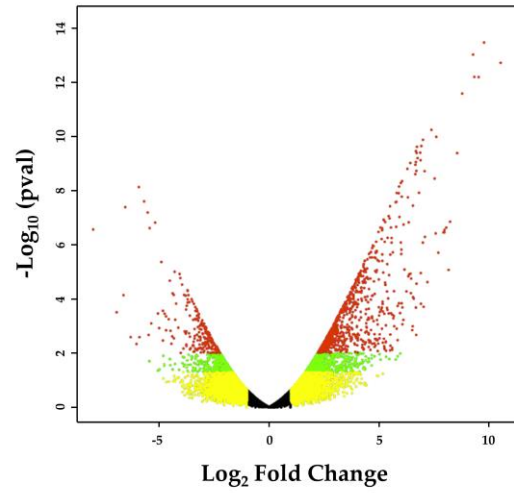

**Asia-24 0 hpi vs 32 hpi**

**Figure S3.** Differentially expressed gene (DEG) results expressed as Volcano plot. The Volcano plots were displayed in different colors according to each analysis option in the DEG analysis:  $FDR < 0.01$ ,  $2 < |\log_2 \text{fold change}|$  (red),  $0.01 < FDR < 0.05$ ,  $2 < |\log_2 \text{fold change}|$  (green),  $0.05 < FDR$ ,  $2 < |\log_2 \text{fold change}|$  (yellow), and  $FDR < 0.05$ ,  $|\log_2 \text{fold change}| < 2$  (black). hpi: hours post inoculation.



(A)

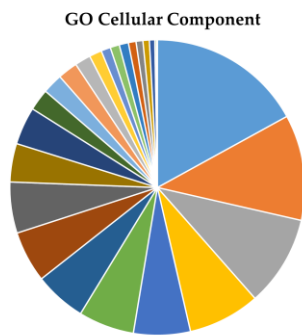

| Functional category            | Gene count |
|--------------------------------|------------|
| nucleus                        | 1772       |
| chloroplast                    | 1204       |
| cytoplasm                      | 1034       |
| other intracellular components | 822        |
| plasma membrane                | 648        |
| mitochondrion                  | 636        |
| cytosol                        | 591        |
| plastid                        | 585        |
| other membranes                | 582        |
| other cellular components      | 438        |
| extracellular region           | 430        |
| vacuole                        | 246        |
| Golgi apparatus                | 230        |
| endoplasmic reticulum          | 226        |
| thylakoid                      | 181        |
| unknown cellular components    | 143        |
| nucleolus                      | 108        |
| nucleoplasm                    | 105        |
| cell wall                      | 105        |
| peroxisome                     | 87         |
| endosome                       | 78         |
| cytoskeleton                   | 73         |
| ribosome                       | 62         |
| nuclear envelope               | 19         |
| lysosome                       | 10         |

(B)

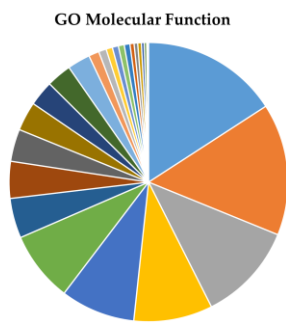

| Functional category                       | Gene count |
|-------------------------------------------|------------|
| protein binding                           | 1170       |
| catalytic activity                        | 1127       |
| unknown molecular functions               | 842        |
| transferase activity                      | 674        |
| other binding                             | 638        |
| hydrolase activity                        | 601        |
| RNA binding                               | 341        |
| DNA binding                               | 315        |
| transporter activity                      | 276        |
| kinase activity                           | 248        |
| nucleic acid binding                      | 216        |
| DNA-binding transcription factor activity | 214        |
| nucleotide binding                        | 195        |
| enzyme regulator activity                 | 89         |
| structural molecule activity              | 66         |
| nuclease activity                         | 54         |
| chromatin binding                         | 52         |
| other molecular functions                 | 50         |
| lipid binding                             | 49         |
| carbohydrate binding                      | 35         |
| transcription regulator activity          | 31         |
| translation factor activity, RNA binding  | 31         |
| signaling receptor activity               | 24         |
| motor activity                            | 21         |
| signaling receptor binding                | 10         |
| translation regulator activity            | 5          |
| oxygen binding                            | 1          |

(C)

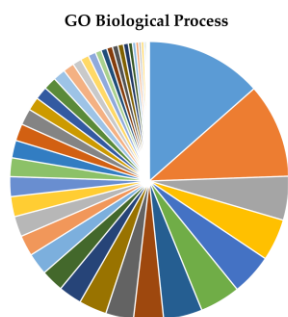

| Functional category                              | Gene count | Functional category                            | Gene count |
|--------------------------------------------------|------------|------------------------------------------------|------------|
| other cellular processes                         | 2913       | lipid metabolic process                        | 320        |
| other metabolic processes                        | 2368       | growth                                         | 310        |
| anatomical structure development                 | 1099       | cell differentiation                           | 276        |
| response to stress                               | 1048       | carbohydrate metabolic process                 | 220        |
| biosynthetic process                             | 1032       | embryo development                             | 209        |
| response to chemical                             | 1012       | cell cycle                                     | 191        |
| multicellular organism development               | 972        | cell communication                             | 149        |
| nucleobase-containing compound metabolic process | 750        | DNA metabolic process                          | 148        |
| cellular component organization                  | 696        | flower development                             | 144        |
| reproduction                                     | 696        | secondary metabolic process                    | 140        |
| post-embryonic development                       | 582        | cell growth                                    | 137        |
| response to abiotic stimulus                     | 563        | translation                                    | 125        |
| cellular protein modification process            | 547        | generation of precursor metabolites and energy | 101        |
| response to external stimulus                    | 520        | pollination                                    | 82         |
| catabolic process                                | 510        | photosynthesis                                 | 72         |
| response to light stimulus                       | 503        | regulation of molecular function               | 66         |
| response to endogenous stimulus                  | 496        | cellular homeostasis                           | 62         |
| transport                                        | 469        | cell death                                     | 39         |
| response to biotic stimulus                      | 439        | circadian rhythm                               | 38         |
| signal transduction                              | 426        | tropism                                        | 27         |
| unknown biological processes                     | 407        | regulation of gene expression, epigenetic      | 19         |
| other biological processes                       | 336        | cell-cell signaling                            | 10         |
| protein metabolic process                        | 324        | abscission                                     | 6          |

**Figure S4.** GO annotation of transcripts clustered in Cluster 4. (A) GO Cellular Component, (B) GO Molecular Function, (C) GO Biological Process.

(A)

## Alpha-linolenic acid metabolism pathway

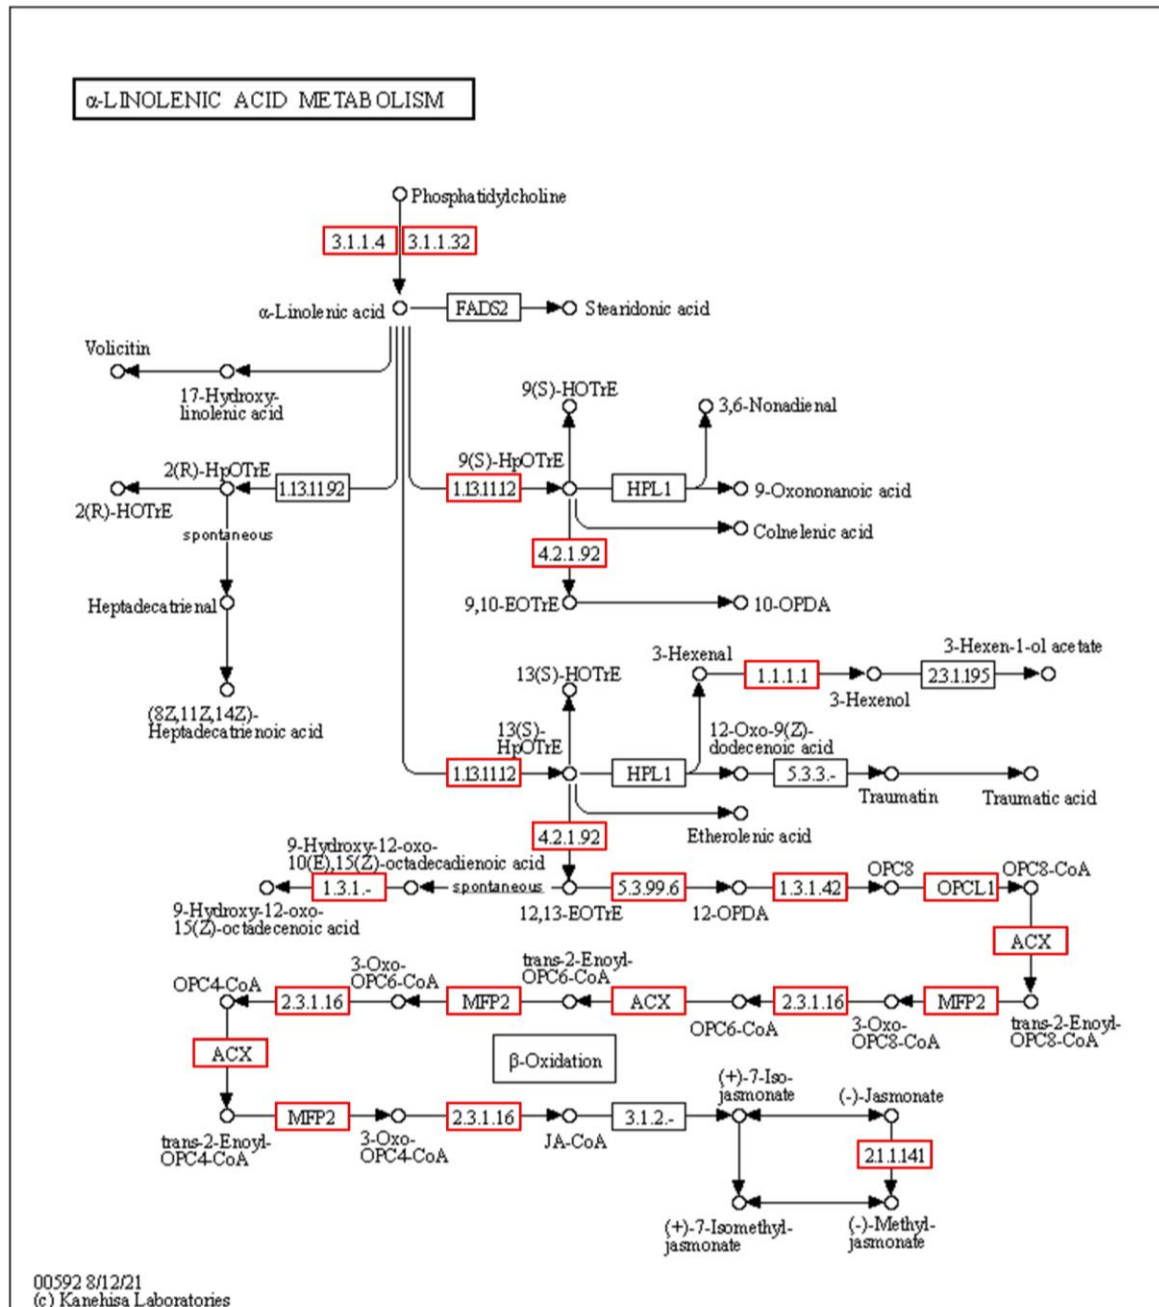

(B)

## MAPK signaling pathway

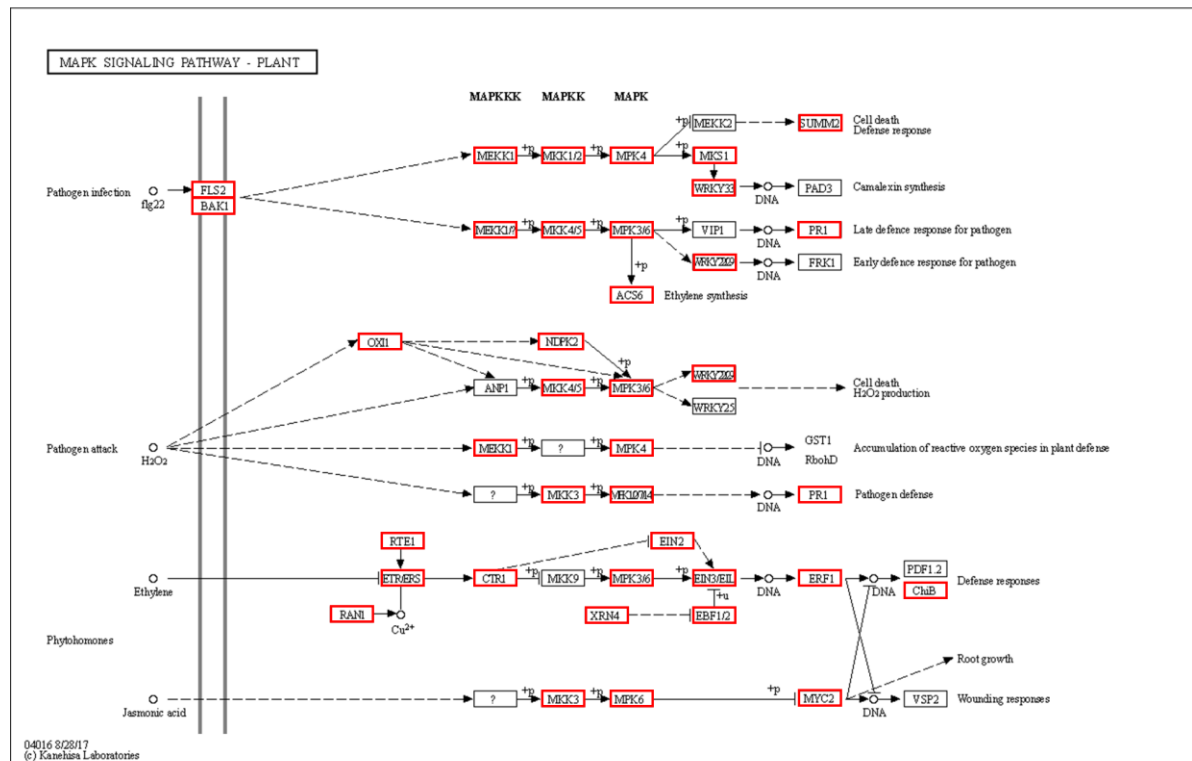

(C)

## Plant hormone signal transduction – Carotenoid biosynthesis pathway

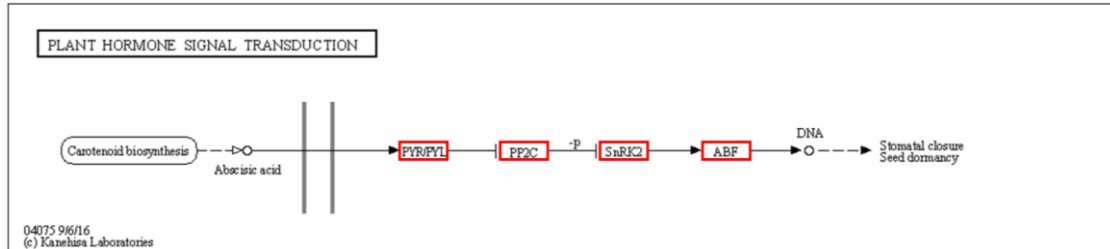

## Plant hormone signal transduction – Cysteine and methionine metabolism

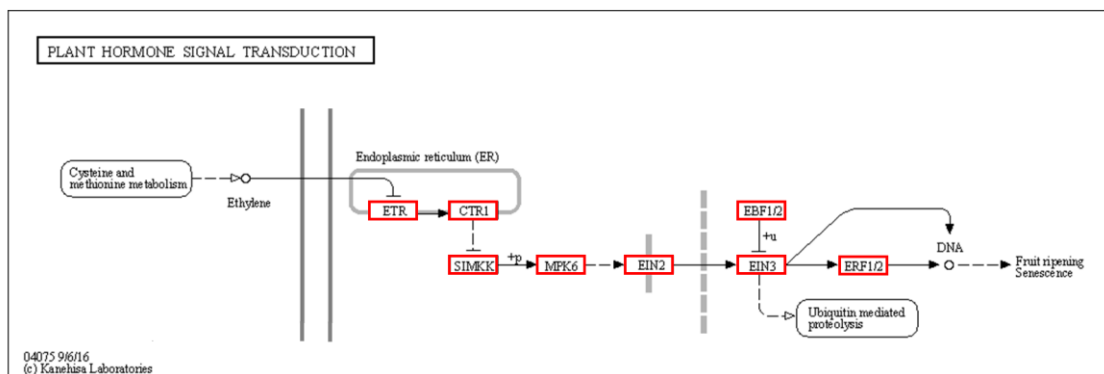

## Plant hormone signal transduction – Brassinosteroid biosynthesis

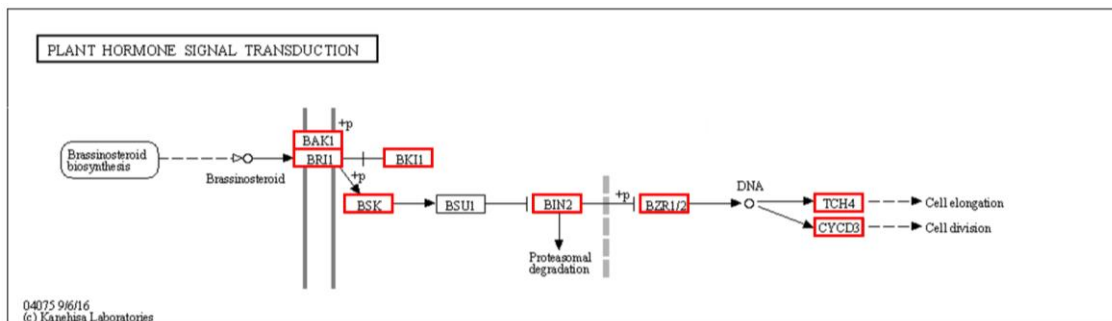

## Plant hormone signal transduction – Phenylalanine metabolism

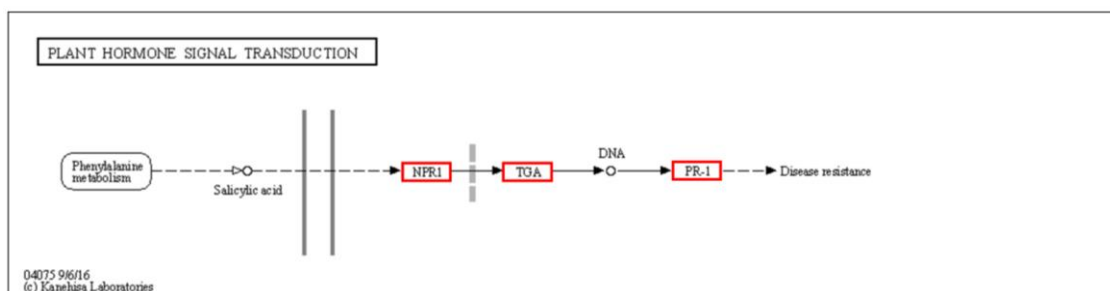

(D)

## Plant – Pathogen interaction

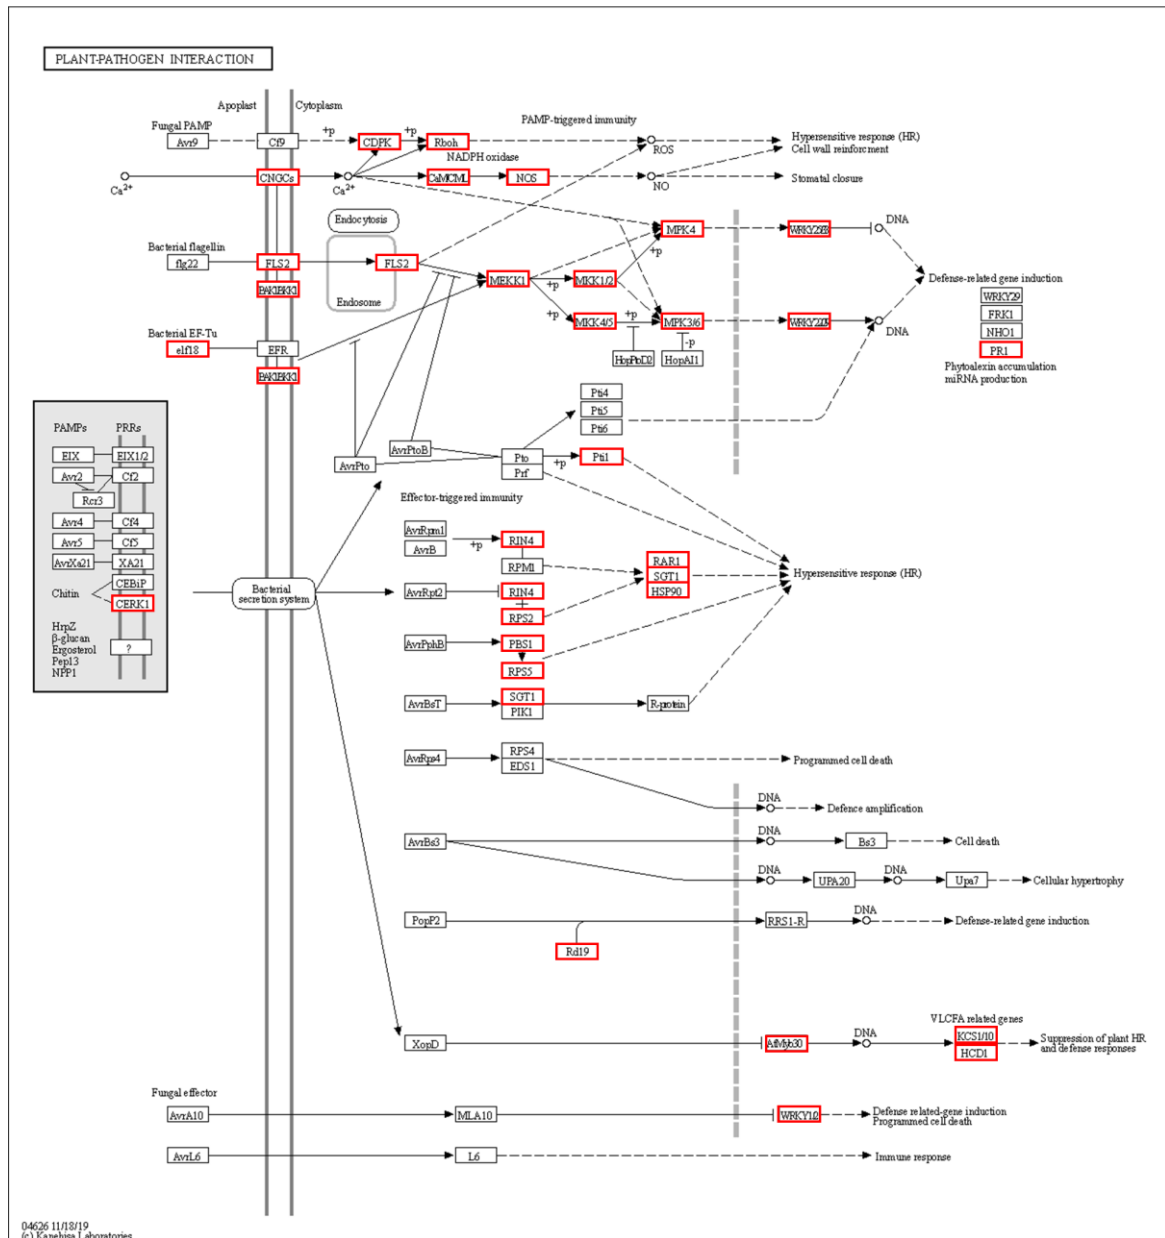

**Figure S5.** Results of KEGG pathway analysis considered to be related to gray mold resistance. (A) Alpha-linolenic acid metabolism, (B) MAPK signaling pathway, (C) Plant hormone signal transduction-Carotenoid biosynthesis pathway; Plant hormone signal transduction-Cysteine and methionine metabolism; Plant hormone signal transduction-Brassicosteroid biosynthesis; Plant hormone signal transduction-Phenylalanine metabolism, (D) Plant-pathogen interaction. The genes matched with onion transcripts were displayed red box.



**Table S1.** Primer sets for confirmation of selected gene sequences

| Gene        | Primer name           | Orientation | Nucleotide sequences (5' to 3')   |
|-------------|-----------------------|-------------|-----------------------------------|
| <i>JAR1</i> | 1st exon              | Forward     | TGT TTT CCG CAG ACC TTT TGA A     |
|             | (Include start codon) | Reverse     | TGG CTT CCC TTT TGT AGT ACC A     |
|             | 2nd exon              | Forward     | AGC TGC CTT CAG TCA TCA CAA       |
|             |                       | Reverse     | CAC TAC ACT TGT GAC ATG TTC CG    |
|             | 3rd exon              | Forward     | TCT ACG AGA AGG GGT AGC TGT       |
|             | (Include stop codon)  | Reverse     | AGA ATA CGA ACA AAC CTG CAC C     |
| <i>COI1</i> | 1st exon              | Forward     | TGC CGC TAG TAT AAT GTT GAG CT    |
|             | (Include start codon) | Reverse     | ACT TGT ATC AGC TGC CCA GT        |
|             | 2nd exon              | Forward     | GGA GGA GGC GGA AGT GTT TT        |
|             |                       | Reverse     | GCT CTG CTC CTC CCC TAA CA        |
|             | 3rd exon              | Forward     | AGA GAT GTT TGC GTG CGA GT        |
|             | (Include stop codon)  | Reverse     | ACA AAA CCA GCC AAG CAA ATT TTT A |
| <i>MYC2</i> | 1st exon              | Forward     | CTC GAC GCA CTA ACC GGA G         |
|             | (Include start codon) | Reverse     | TGC TAA AAC AAC GCT CGA TCA       |
|             | 2nd exon              | Forward     | CCT TCT CCT TCT ACC TCA TTT CCT C |
|             | (Include stop codon)  | Reverse     | CAT ATC TAA AAG TCC GTC TTC TCC G |

**Table S2.** Primer sets for high-resolution melting (HRM) analysis.

| Primer name | Orientation | Nucleotide sequences (5' to 3')   |
|-------------|-------------|-----------------------------------|
| <i>JAR1</i> | Forward     | GCT GAG TAT TTG CAA AAT TTG GGT C |
|             | Reverse     | TGT CAA TGG AGT TCC GGT CAG       |
| <i>COI1</i> | Forward     | GGC GGC GAT TTC CTA CGT TA        |
|             | Reverse     | CCT GCA TAG CCT CCC CAA TC        |
| <i>MYC2</i> | Forward     | CAA CCA GGA ATC CCT CCA GC        |
|             | Reverse     | GAC TGC CAG AAG ATG GCG TA        |

**Table S3.** Statistics of sequence raw data.

| Sample ID      | Total read bases | Total reads | Q30 <sup>a</sup><br>(%) |
|----------------|------------------|-------------|-------------------------|
| Asia_23_0 hpi  | 5,159,368,052    | 51,082,852  | 93.96                   |
| Asia_23_4 hpi  | 5,397,686,642    | 53,442,442  | 93.99                   |
| Asia_23_8 hpi  | 5,410,303,966    | 53,567,366  | 94.85                   |
| Asia_23_16 hpi | 5,459,818,004    | 54,057,604  | 93.19                   |
| Asia_23_24 hpi | 5,427,496,792    | 53,737,592  | 94.04                   |
| Asia_23_32 hpi | 5,164,047,382    | 51,129,182  | 93.58                   |
| Asia_24_0 hpi  | 5,343,300,768    | 52,903,968  | 95.06                   |
| Asia_24_4 hpi  | 5,301,659,276    | 52,491,676  | 93.99                   |
| Asia_24_8 hpi  | 5,356,953,342    | 53,039,142  | 93.92                   |
| Asia_24_16 hpi | 5,322,845,642    | 52,701,442  | 94.17                   |
| Asia_24_24 hpi | 5,252,278,962    | 52,002,762  | 93.94                   |
| Asia_24_32 hpi | 5,122,853,118    | 50,721,318  | 94.36                   |

<sup>a</sup> Ratio of bases that have phred quality score greater than or equal to 30.

**Table S4.** Pre-processing results of onion RNA sequence raw data.

| Sample ID      | Raw Data    |                       | Trimmed Data |                       |
|----------------|-------------|-----------------------|--------------|-----------------------|
|                | Total Reads | Total read bases (bp) | Total Reads  | Total read bases (bp) |
| Asia-23_0_hpi  | 53,442,442  | 5,397,686,642         | 48,159,176   | 4,846,678,416         |
| Asia-23_4_hpi  | 53,567,366  | 5,410,303,966         | 49,467,140   | 4,979,339,740         |
| Asia-23_8_hpi  | 54,057,604  | 5,459,818,004         | 47,964,876   | 4,824,642,022         |
| Asia-23_16_hpi | 53,737,592  | 5,427,496,792         | 49,021,478   | 4,932,839,546         |
| Asia-23_24_hpi | 51,129,182  | 5,164,047,382         | 45,008,816   | 4,529,201,024         |
| Asia-23_32_hpi | 51,947,444  | 5,246,691,844         | 46,223,388   | 4,651,745,224         |
| Asia-24_0_hpi  | 52,903,968  | 5,343,300,768         | 48,938,402   | 4,927,956,063         |
| Asia-24_4_hpi  | 52,491,676  | 5,301,659,276         | 47,029,632   | 4,732,586,446         |
| Asia-24_8_hpi  | 53,039,142  | 5,356,953,342         | 47,633,440   | 4,793,750,309         |
| Asia-24_16_hpi | 52,701,442  | 5,322,845,642         | 47,396,334   | 4,770,861,379         |
| Asia-24_24_hpi | 52,002,762  | 5,252,278,962         | 46,667,746   | 4,696,488,290         |
| Asia-24_32_hpi | 50,721,318  | 5,122,853,118         | 45,931,580   | 4,623,373,129         |

**Table S5.** Results of mapping and alignment to reference data of pre-processed RNA sequence data.

| Sample         | Progressed reads | Mapped reads | Mapping rate <sup>a</sup><br>(%) |
|----------------|------------------|--------------|----------------------------------|
| Asia-23_0_hpi  | 48,159,176       | 40,345,980   | 83.80%                           |
| Asia-23_4_hpi  | 49,467,140       | 36,736,709   | 74.30%                           |
| Asia-23_8_hpi  | 47,964,876       | 37,878,527   | 79.00%                           |
| Asia-23_16_hpi | 49,021,478       | 40,383,170   | 82.40%                           |
| Asia-23_24_hpi | 45,008,816       | 38,654,847   | 85.90%                           |
| Asia-23_32_hpi | 46,223,388       | 39,394,150   | 85.20%                           |
| Asia-24_0_hpi  | 48,938,402       | 40,505,969   | 82.80%                           |
| Asia-24_4_hpi  | 47,029,632       | 37,595,701   | 79.90%                           |
| Asia-24_8_hpi  | 47,633,440       | 36,243,746   | 76.10%                           |
| Asia-24_16_hpi | 47,396,334       | 37,886,277   | 79.90%                           |
| Asia-24_24_hpi | 46,667,746       | 38,889,514   | 83.30%                           |
| Asia-24_32_hpi | 45,931,580       | 38,286,473   | 83.40%                           |

<sup>a</sup> Mapping rate: (Mapped reads / Progressed reads) × 100



**Table S6.** DEG comparison at each hour post inoculation (hpi) within the resistant and susceptible sample groups.

| DEG group                       | Upregulated genes | Downregulated genes | Total |
|---------------------------------|-------------------|---------------------|-------|
| Asia_23_0 hpi vs Asia_23_4 hpi  | 770               | 90                  | 860   |
| Asia_23_0 hpi vs Asia_23_8 hpi  | 535               | 73                  | 608   |
| Asia_23_0 hpi vs Asia_23_16 hpi | 677               | 136                 | 813   |
| Asia_23_0 hpi vs Asia_23_24 hpi | 673               | 101                 | 774   |
| Asia_23_0 hpi vs Asia_23_32 hpi | 317               | 37                  | 354   |
| Asia_24_0 hpi vs Asia_24_4 hpi  | 670               | 166                 | 836   |
| Asia_24_0 hpi vs Asia_24_8 hpi  | 476               | 131                 | 607   |
| Asia_24_0 hpi vs Asia_24_16 hpi | 761               | 300                 | 1061  |
| Asia_24_0 hpi vs Asia_24_24 hpi | 340               | 112                 | 452   |
| Asia_24_0 hpi vs Asia_24_32 hpi | 406               | 58                  | 464   |
