# Supplementary material for: Using Transcriptome Analysis to Explore Gray Mold Resistance-Related Genes in Onion (Alliumcepa L.)
Source: MDPI journal article supplement (doi:10.3390/genes13030542), 2022-03-18
Supplement: s1 [file s1]

## Sheet: Asia-23 0 hpi vs 4 hpi
Gene ID	DE results	TAIR ID			GO annotatied transcripts
Acepa_076185.p1	upregulated	AT2G25770			Response to stress	Response to biotic stimulus
Acepa_039132.p1	upregulated	AT1G55020		Upregulated transcripts	132	62
Acepa_020507.p1	upregulated	AT3G59970		Downregulated transcripts	19	3
Acepa_072879.p1	upregulated	AT5G24580
Acepa_100419.p1	upregulated	AT2G25770
Acepa_010806.p1	upregulated	AT1G66370
Acepa_068523.p1	upregulated	AT1G64980
Acepa_083211.p1	upregulated	AT5G10770
Acepa_047563.p1	upregulated	AT2G18340
Acepa_100030.p1	upregulated	AT4G28365
Acepa_014532.p1	upregulated	AT4G10770
Acepa_029607.p1	upregulated	-
Acepa_022533.p1	upregulated	AT1G20190
Acepa_054038.p1	upregulated	AT1G13680
Acepa_028906.p1	upregulated	AT3G55120
Acepa_056201.p1	upregulated	AT1G69780
Acepa_000089.p1	upregulated	AT4G28310
Acepa_034509.p1	upregulated	AT1G62440
Acepa_037013.p1	upregulated	AT5G12940
Acepa_103602.p1	upregulated	AT3G19000
Acepa_071545.p1	upregulated	AT3G15680
Acepa_019058.p1	upregulated	AT1G01050
Acepa_079701.p1	upregulated	-
Acepa_048450.p1	upregulated	AT4G10250
Acepa_030962.p1	upregulated	AT5G17920
Acepa_045996.p1	upregulated	AT5G43860
Acepa_069295.p1	upregulated	AT3G51520
Acepa_046742.p2	upregulated	AT1G18210
Acepa_032882.p1	upregulated	AT2G32300
Acepa_066993.p1	upregulated	AT1G16905
Acepa_021069.p1	upregulated	AT1G23340
Acepa_031254.p1	upregulated	AT1G14290
Acepa_016262.p1	upregulated	AT5G67150
Acepa_099683.p1	upregulated	AT2G46960
Acepa_028821.p1	upregulated	AT5G55730
Acepa_000182.p1	upregulated	AT3G45140
Acepa_050917.p1	upregulated	AT3G26590
Acepa_094818.p1	upregulated	AT5G61160
Acepa_011591.p1	upregulated	AT5G15490
Acepa_010486.p1	upregulated	AT5G03300
Acepa_053158.p1	upregulated	AT5G57800
Acepa_048973.p1	upregulated	AT1G54970
Acepa_032073.p2	upregulated	AT1G24620
Acepa_102425.p2	upregulated	AT3G24255
Acepa_072035.p1	upregulated	AT2G28900
Acepa_053737.p1	upregulated	AT3G16370
Acepa_021432.p1	upregulated	AT5G05340
Acepa_092793.p2	upregulated	AT5G01740
Acepa_008941.p1	upregulated	AT1G11545
Acepa_102001.p3	upregulated	-
Acepa_035061.p1	upregulated	AT3G08030
Acepa_024033.p1	upregulated	AT1G76240
Acepa_022179.p1	upregulated	-
Acepa_067524.p1	upregulated	AT2G06050
Acepa_023007.p1	upregulated	AT5G06390
Acepa_097139.p1	upregulated	AT1G68280
Acepa_009148.p2	upregulated	AT2G29550
Acepa_092028.p1	upregulated	AT2G39980
Acepa_021584.p1	upregulated	AT4G28250
Acepa_036817.p1	upregulated	AT1G34040
Acepa_045318.p1	upregulated	AT3G49720
Acepa_029093.p1	upregulated	AT5G44640
Acepa_050690.p1	upregulated	AT5G06860
Acepa_070341.p1	upregulated	AT3G09130
Acepa_047904.p1	upregulated	AT3G23560
Acepa_074928.p2	upregulated	AT1G10070
Acepa_012126.p1	upregulated	AT3G12145
Acepa_034088.p1	upregulated	AT4G39490
Acepa_103102.p1	upregulated	AT2G19130
Acepa_077747.p1	upregulated	AT1G67070
Acepa_020246.p1	upregulated	AT3G20390
Acepa_033355.p1	upregulated	-
Acepa_070664.p1	upregulated	AT1G05370
Acepa_009749.p1	upregulated	AT5G62360
Acepa_010932.p1	upregulated	AT1G22400
Acepa_031178.p1	upregulated	AT2G43020
Acepa_025448.p1	upregulated	AT3G10080
Acepa_043078.p1	upregulated	AT1G55020
Acepa_001350.p1	upregulated	-
Acepa_067617.p1	upregulated	AT1G43160
Acepa_067709.p2	upregulated	AT5G59845
Acepa_028481.p1	upregulated	AT2G01050
Acepa_043043.p1	upregulated	AT2G26640
Acepa_039603.p1	upregulated	AT4G13940
Acepa_036439.p1	upregulated	AT2G39130
Acepa_035838.p1	upregulated	AT1G68530
Acepa_068770.p1	upregulated	AT2G41480
Acepa_081618.p1	upregulated	AT2G47140
Acepa_075638.p1	upregulated	AT4G15920
Acepa_043178.p1	upregulated	AT3G15810
Acepa_055068.p1	upregulated	AT3G22400
Acepa_010488.p1	upregulated	AT5G03300
Acepa_039903.p1	upregulated	AT1G22610
Acepa_058506.p1	upregulated	AT2G17230
Acepa_040959.p1	upregulated	AT4G39830
Acepa_077641.p1	upregulated	AT1G80160
Acepa_047418.p1	upregulated	AT1G24360
Acepa_029873.p1	upregulated	AT3G61750
Acepa_058196.p1	upregulated	AT2G47140
Acepa_014745.p1	upregulated	-
Acepa_072089.p1	upregulated	AT2G02980
Acepa_068541.p3	upregulated	-
Acepa_049348.p1	upregulated	AT1G04040
Acepa_044338.p1	upregulated	AT3G20390
Acepa_097146.p1	upregulated	AT5G44020
Acepa_061163.p1	upregulated	AT5G50700
Acepa_047391.p1	upregulated	AT5G13930
Acepa_012619.p1	upregulated	AT5G03760
Acepa_033914.p1	upregulated	AT1G65010
Acepa_016893.p1	upregulated	AT1G24360
Acepa_083686.p1	upregulated	AT5G03300
Acepa_018543.p1	upregulated	AT2G40330
Acepa_020248.p1	upregulated	AT3G20390
Acepa_059141.p1	upregulated	-
Acepa_020558.p1	upregulated	AT3G51590
Acepa_029912.p1	upregulated	AT5G62220
Acepa_041691.p1	upregulated	AT2G20340
Acepa_012617.p1	upregulated	AT5G03760
Acepa_017251.p1	upregulated	AT2G38360
Acepa_040706.p1	upregulated	AT2G19880
Acepa_045329.p1	upregulated	AT3G58060
Acepa_014448.p1	upregulated	AT1G08250
Acepa_031571.p1	upregulated	AT3G45140
Acepa_041732.p1	upregulated	AT5G11880
Acepa_013744.p1	upregulated	AT1G30570
Acepa_082884.p1	upregulated	AT3G51070
Acepa_104418.p1	upregulated	AT3G45140
Acepa_072204.p1	upregulated	AT3G23250
Acepa_012380.p1	upregulated	AT2G01050
Acepa_051792.p1	upregulated	AT1G17890
Acepa_049901.p1	upregulated	AT1G47480
Acepa_100029.p1	upregulated	AT4G28365
Acepa_025178.p1	upregulated	AT5G50200
Acepa_082646.p1	upregulated	-
Acepa_019391.p1	upregulated	AT3G23740
Acepa_017052.p1	upregulated	AT3G51590
Acepa_068193.p1	upregulated	AT5G01740
Acepa_039496.p2	upregulated	AT1G21310
Acepa_054685.p1	upregulated	-
Acepa_104773.p1	upregulated	AT4G23160
Acepa_036853.p1	upregulated	AT3G51520
Acepa_037350.p1	upregulated	AT5G13750
Acepa_042971.p1	upregulated	AT3G15030
Acepa_071023.p1	upregulated	AT3G56200
Acepa_027844.p1	upregulated	AT5G06860
Acepa_103410.p1	upregulated	-
Acepa_095360.p1	upregulated	-
Acepa_095656.p1	upregulated	AT1G14290
Acepa_035554.p1	upregulated	AT2G04780
Acepa_035271.p2	upregulated	AT1G21310
Acepa_035197.p1	upregulated	AT4G39490
Acepa_008297.p1	upregulated	AT3G26300
Acepa_041485.p1	upregulated	AT2G06050
Acepa_021071.p1	upregulated	AT1G02520
Acepa_071727.p1	upregulated	AT5G06720
Acepa_029742.p1	upregulated	AT1G56600
Acepa_084802.p1	upregulated	AT4G13930
Acepa_020867.p1	upregulated	AT4G20520
Acepa_001065.p1	upregulated	AT3G21690
Acepa_065927.p1	upregulated	AT2G31670
Acepa_053159.p1	upregulated	AT5G57800
Acepa_028393.p1	upregulated	-
Acepa_037376.p1	upregulated	AT4G36360
Acepa_052619.p1	upregulated	AT2G36970
Acepa_032326.p1	upregulated	-
Acepa_023533.p1	upregulated	AT4G35160
Acepa_034637.p1	upregulated	AT1G55020
Acepa_035459.p1	upregulated	AT1G62660
Acepa_092483.p1	upregulated	AT2G32300
Acepa_020927.p1	upregulated	AT1G76160
Acepa_035295.p1	upregulated	AT3G19910
Acepa_100286.p1	upregulated	AT2G31390
Acepa_038241.p1	upregulated	AT1G55020
Acepa_013253.p1	upregulated	AT5G02500
Acepa_017736.p1	upregulated	AT2G46960
Acepa_020651.p1	upregulated	AT3G30180
Acepa_105854.p1	upregulated	AT3G06035
Acepa_021750.p1	upregulated	AT1G09310
Acepa_038166.p2	upregulated	AT3G50660
Acepa_102917.p1	upregulated	AT3G48740
Acepa_103428.p1	upregulated	AT3G29750
Acepa_010484.p1	upregulated	AT5G03300
Acepa_024138.p1	upregulated	AT2G46630
Acepa_036954.p1	upregulated	AT3G42170
Acepa_031148.p1	upregulated	-
Acepa_009890.p1	upregulated	AT5G13870
Acepa_031267.p1	upregulated	AT1G24540
Acepa_046270.p1	upregulated	-
Acepa_035726.p1	upregulated	AT5G38970
Acepa_034223.p1	upregulated	AT1G76680
Acepa_071067.p1	upregulated	AT4G38660
Acepa_005294.p1	upregulated	AT1G14290
Acepa_039519.p1	upregulated	AT5G23420
Acepa_052636.p1	upregulated	AT1G79750
Acepa_055050.p1	upregulated	AT3G50120
Acepa_018826.p1	upregulated	AT2G39700
Acepa_041658.p2	upregulated	AT2G40540
Acepa_067296.p1	upregulated	AT1G08830
Acepa_034280.p1	upregulated	AT4G13710
Acepa_009892.p1	upregulated	AT5G13870
Acepa_055294.p1	upregulated	AT5G45280
Acepa_022567.p1	upregulated	AT5G50290
Acepa_022197.p1	upregulated	AT1G08080
Acepa_035195.p2	upregulated	AT3G11080
Acepa_035483.p1	upregulated	AT2G25770
Acepa_033011.p1	upregulated	AT5G61890
Acepa_068470.p1	upregulated	AT1G55210
Acepa_070646.p1	upregulated	AT1G12110
Acepa_047631.p1	upregulated	AT5G06860
Acepa_042503.p1	upregulated	AT2G37790
Acepa_029332.p1	upregulated	AT2G29570
Acepa_028508.p1	upregulated	AT1G08280
Acepa_035057.p1	upregulated	AT2G23180
Acepa_029691.p1	upregulated	AT1G76690
Acepa_070052.p1	upregulated	AT5G01320
Acepa_015609.p1	upregulated	AT3G22142
Acepa_096746.p1	upregulated	AT5G28010
Acepa_096750.p1	upregulated	-
Acepa_035567.p1	upregulated	AT1G76680
Acepa_093105.p1	upregulated	AT3G20390
Acepa_036237.p1	upregulated	-
Acepa_015817.p1	upregulated	AT4G12730
Acepa_022199.p1	upregulated	AT2G28210
Acepa_031117.p1	upregulated	AT4G37810
Acepa_071016.p1	upregulated	AT3G53960
Acepa_072195.p1	upregulated	AT2G47460
Acepa_051861.p1	upregulated	AT1G25230
Acepa_049349.p1	upregulated	AT1G04040
Acepa_042408.p1	upregulated	AT1G62760
Acepa_011467.p1	upregulated	AT5G52060
Acepa_020707.p3	upregulated	AT2G44160
Acepa_019233.p1	upregulated	AT2G36870
Acepa_060671.p1	upregulated	AT1G34060
Acepa_050631.p1	upregulated	AT5G05340
Acepa_046497.p1	upregulated	AT5G63450
Acepa_035680.p1	upregulated	AT4G20940
Acepa_104772.p1	upregulated	AT4G23160
Acepa_033750.p2	upregulated	AT1G68530
Acepa_030867.p1	upregulated	AT5G12020
Acepa_042305.p1	upregulated	AT4G14960
Acepa_009943.p1	upregulated	AT5G56000
Acepa_073049.p1	upregulated	AT2G25737
Acepa_019236.p1	upregulated	AT1G27680
Acepa_102134.p1	upregulated	AT3G59970
Acepa_071430.p1	upregulated	AT2G23180
Acepa_037639.p1	upregulated	AT4G11050
Acepa_043022.p1	upregulated	AT1G65840
Acepa_083302.p1	upregulated	AT4G25260
Acepa_029805.p1	upregulated	AT4G13540
Acepa_103735.p1	upregulated	AT1G64060
Acepa_020677.p1	upregulated	AT5G02750
Acepa_037061.p1	upregulated	AT1G74670
Acepa_069565.p1	upregulated	AT5G43860
Acepa_040229.p2	upregulated	AT1G02205
Acepa_078769.p1	upregulated	AT2G35660
Acepa_021565.p1	upregulated	AT2G46960
Acepa_095270.p1	upregulated	AT1G68530
Acepa_011597.p1	upregulated	AT3G07320
Acepa_066612.p1	upregulated	AT1G67600
Acepa_101261.p1	upregulated	AT5G59480
Acepa_035959.p1	upregulated	AT5G20950
Acepa_034127.p1	upregulated	AT4G08770
Acepa_039239.p1	upregulated	AT5G45280
Acepa_077136.p1	upregulated	-
Acepa_095775.p1	upregulated	AT3G45970
Acepa_073396.p1	upregulated	AT2G41380
Acepa_024321.p1	upregulated	ATMG01250
Acepa_014653.p1	upregulated	AT4G32890
Acepa_023752.p1	upregulated	AT5G62700
Acepa_101331.p1	upregulated	AT4G14350
Acepa_038453.p1	upregulated	AT1G79750
Acepa_074801.p1	upregulated	AT5G20950
Acepa_035498.p1	upregulated	AT2G26640
Acepa_038015.p1	upregulated	AT5G17920
Acepa_036322.p1	upregulated	AT1G12110
Acepa_016713.p1	upregulated	AT5G05320
Acepa_055137.p1	upregulated	AT5G54160
Acepa_025200.p1	upregulated	AT5G53580
Acepa_055868.p2	upregulated	AT3G26300
Acepa_028390.p1	upregulated	AT3G11320
Acepa_049184.p1	upregulated	-
Acepa_038127.p1	upregulated	AT5G49720
Acepa_023823.p1	upregulated	-
Acepa_024335.p1	upregulated	AT2G30620
Acepa_056972.p1	upregulated	AT3G13790
Acepa_035372.p1	upregulated	AT5G17920
Acepa_039652.p1	upregulated	AT4G39490
Acepa_094556.p1	upregulated	AT1G03070
Acepa_051318.p1	upregulated	AT4G15920
Acepa_041465.p1	upregulated	AT4G34131
Acepa_038271.p1	upregulated	AT1G15950
Acepa_071977.p1	upregulated	-
Acepa_077756.p1	upregulated	AT1G53820
Acepa_037601.p1	upregulated	AT5G02500
Acepa_082241.p1	upregulated	AT2G45750
Acepa_046350.p1	upregulated	AT2G26640
Acepa_011906.p1	upregulated	-
Acepa_005788.p1	upregulated	AT4G27435
Acepa_006884.p1	upregulated	AT1G08080
Acepa_042132.p1	upregulated	AT1G55020
Acepa_008921.p1	upregulated	AT2G26680
Acepa_021863.p1	upregulated	AT2G15325
Acepa_082113.p1	upregulated	AT3G13790
Acepa_036857.p2	upregulated	AT1G43760
Acepa_037764.p1	upregulated	AT1G12240
Acepa_054352.p1	upregulated	AT1G02520
Acepa_027918.p1	upregulated	AT1G20450
Acepa_059810.p1	upregulated	-
Acepa_075723.p1	upregulated	AT2G44940
Acepa_027161.p1	upregulated	AT3G54950
Acepa_008204.p1	upregulated	AT4G26630
Acepa_039049.p1	upregulated	AT2G42380
Acepa_040402.p1	upregulated	AT5G01320
Acepa_005733.p1	upregulated	AT4G36850
Acepa_032240.p1	upregulated	AT4G39730
Acepa_032414.p1	upregulated	AT5G46940
Acepa_037643.p1	upregulated	AT5G23940
Acepa_005015.p1	upregulated	AT1G14360
Acepa_015329.p1	upregulated	AT1G76160
Acepa_019223.p1	upregulated	AT5G05340
Acepa_076621.p1	upregulated	AT1G71110
Acepa_037894.p2	upregulated	AT1G49670
Acepa_029203.p1	upregulated	AT3G29670
Acepa_072036.p1	upregulated	AT2G28900
Acepa_044121.p1	upregulated	AT3G25900
Acepa_096407.p1	upregulated	AT4G35160
Acepa_077269.p1	upregulated	AT5G47330
Acepa_100920.p1	upregulated	AT1G33540
Acepa_039715.p1	upregulated	AT1G24020
Acepa_009948.p1	upregulated	AT2G39700
Acepa_070639.p1	upregulated	AT3G04720
Acepa_041649.p1	upregulated	AT2G23180
Acepa_016041.p1	upregulated	AT5G17040
Acepa_054022.p3	upregulated	-
Acepa_061945.p1	upregulated	-
Acepa_040212.p1	upregulated	AT5G57800
Acepa_042685.p1	upregulated	AT1G13280
Acepa_026225.p1	upregulated	AT5G05170
Acepa_051321.p1	upregulated	AT4G15920
Acepa_066361.p1	upregulated	AT1G10550
Acepa_040491.p1	upregulated	AT1G21310
Acepa_038119.p1	upregulated	AT2G22250
Acepa_006695.p1	upregulated	AT3G49720
Acepa_041963.p1	upregulated	AT1G02850
Acepa_020653.p1	upregulated	AT3G30180
Acepa_019968.p1	upregulated	AT1G60590
Acepa_042046.p1	upregulated	AT4G20940
Acepa_020042.p1	upregulated	AT2G01660
Acepa_048607.p2	upregulated	AT2G18180
Acepa_013413.p1	upregulated	AT2G39770
Acepa_067766.p1	upregulated	AT1G18740
Acepa_019232.p1	upregulated	AT2G36870
Acepa_037451.p1	upregulated	AT1G12240
Acepa_050051.p1	upregulated	AT4G05120
Acepa_041325.p1	upregulated	AT4G20520
Acepa_019393.p1	upregulated	AT3G23740
Acepa_068291.p1	upregulated	-
Acepa_017735.p1	upregulated	AT2G46960
Acepa_036185.p1	upregulated	AT3G24255
Acepa_016382.p1	upregulated	AT1G02850
Acepa_049143.p1	upregulated	AT3G53620
Acepa_055246.p1	upregulated	AT1G34040
Acepa_049713.p1	upregulated	AT2G01300
Acepa_074409.p1	upregulated	-
Acepa_095144.p1	upregulated	AT5G51890
Acepa_074802.p1	upregulated	AT5G20950
Acepa_070280.p1	upregulated	AT3G23250
Acepa_027280.p1	upregulated	AT5G13330
Acepa_036580.p1	upregulated	AT3G45140
Acepa_054043.p1	upregulated	AT1G13680
Acepa_023949.p1	upregulated	AT3G15820
Acepa_038386.p1	upregulated	AT5G02500
Acepa_034949.p1	upregulated	AT1G22400
Acepa_055133.p1	upregulated	AT5G54160
Acepa_060277.p1	upregulated	-
Acepa_018821.p1	upregulated	AT1G23460
Acepa_088125.p2	upregulated	AT4G39730
Acepa_099796.p1	upregulated	AT3G26590
Acepa_037176.p1	upregulated	AT5G65360
Acepa_007134.p1	upregulated	AT5G49460
Acepa_039813.p1	upregulated	AT5G48930
Acepa_036655.p1	upregulated	AT1G12240
Acepa_034521.p1	upregulated	AT3G16850
Acepa_039954.p1	upregulated	AT4G11050
Acepa_034029.p1	upregulated	AT1G44350
Acepa_079311.p1	upregulated	AT1G02850
Acepa_015017.p1	upregulated	AT5G06860
Acepa_040098.p1	upregulated	AT3G12580
Acepa_099689.p1	upregulated	AT2G13770
Acepa_057200.p1	upregulated	AT1G53820
Acepa_010444.p1	upregulated	AT2G45470
Acepa_029403.p1	upregulated	AT1G29640
Acepa_028666.p1	upregulated	-
Acepa_030228.p2	upregulated	-
Acepa_036605.p1	upregulated	AT3G12580
Acepa_040655.p1	upregulated	AT1G21310
Acepa_037670.p1	upregulated	AT2G37040
Acepa_071566.p1	upregulated	AT4G28310
Acepa_039676.p1	upregulated	AT3G54400
Acepa_039372.p1	upregulated	AT5G56350
Acepa_042400.p1	upregulated	AT3G23840
Acepa_036856.p1	upregulated	AT2G40540
Acepa_077910.p1	upregulated	AT1G76160
Acepa_005003.p1	upregulated	AT2G22760
Acepa_081286.p1	upregulated	AT1G19180
Acepa_100181.p1	upregulated	AT4G10770
Acepa_014050.p1	upregulated	AT5G45280
Acepa_073858.p1	upregulated	AT1G44350
Acepa_040511.p1	upregulated	AT4G35160
Acepa_031585.p1	upregulated	AT2G45050
Acepa_022088.p2	upregulated	AT3G24255
Acepa_023947.p2	upregulated	AT3G15820
Acepa_023478.p1	upregulated	AT4G37850
Acepa_043146.p2	upregulated	AT1G34060
Acepa_078304.p1	upregulated	AT4G19120
Acepa_068387.p1	upregulated	AT4G39730
Acepa_022278.p1	upregulated	AT4G29930
Acepa_041156.p1	upregulated	AT5G17540
Acepa_020697.p1	upregulated	AT2G01820
Acepa_035193.p2	upregulated	-
Acepa_014269.p1	upregulated	AT1G12570
Acepa_096245.p1	upregulated	AT3G47340
Acepa_008817.p1	upregulated	AT1G55020
Acepa_039217.p1	upregulated	AT3G16520
Acepa_078151.p1	upregulated	AT3G24660
Acepa_039920.p1	upregulated	AT4G36360
Acepa_038083.p1	upregulated	AT2G46960
Acepa_016021.p1	upregulated	AT1G10550
Acepa_016918.p1	upregulated	AT5G63850
Acepa_068481.p1	upregulated	AT2G18969
Acepa_069764.p1	upregulated	AT4G25830
Acepa_045692.p1	upregulated	AT1G64980
Acepa_032435.p1	upregulated	AT5G20060
Acepa_070988.p1	upregulated	AT2G43120
Acepa_007251.p1	upregulated	AT1G23480
Acepa_040439.p1	upregulated	AT1G12240
Acepa_007253.p1	upregulated	AT5G03760
Acepa_041308.p1	upregulated	AT1G10070
Acepa_019961.p2	upregulated	AT1G10640
Acepa_016030.p1	upregulated	AT1G77380
Acepa_067888.p1	upregulated	AT1G32540
Acepa_037727.p1	upregulated	AT3G21690
Acepa_042369.p1	upregulated	AT5G11880
Acepa_051477.p1	upregulated	AT1G78380
Acepa_074228.p1	upregulated	-
Acepa_037150.p3	upregulated	ATMG01250
Acepa_036662.p1	upregulated	AT1G34040
Acepa_023964.p1	upregulated	AT3G24840
Acepa_024766.p1	upregulated	AT1G62660
Acepa_028775.p1	upregulated	AT5G66580
Acepa_104013.p1	upregulated	AT1G68290
Acepa_030875.p1	upregulated	AT3G15680
Acepa_070470.p1	upregulated	AT1G06550
Acepa_076557.p1	upregulated	AT1G19180
Acepa_012658.p1	upregulated	AT1G45191
Acepa_051685.p1	upregulated	AT1G77330
Acepa_008818.p1	upregulated	AT1G55020
Acepa_041097.p1	upregulated	AT4G39330
Acepa_081789.p2	upregulated	-
Acepa_017025.p1	upregulated	AT1G70710
Acepa_001165.p1	upregulated	-
Acepa_044984.p1	upregulated	AT2G40435
Acepa_037239.p4	upregulated	AT4G13710
Acepa_037587.p1	upregulated	AT3G10740
Acepa_041060.p1	upregulated	AT1G62660
Acepa_012575.p1	upregulated	AT4G00360
Acepa_033904.p1	upregulated	AT3G06880
Acepa_076777.p1	upregulated	-
Acepa_013660.p1	upregulated	AT1G22330
Acepa_085162.p1	upregulated	AT3G45970
Acepa_080477.p1	upregulated	-
Acepa_042710.p1	upregulated	AT1G08010
Acepa_095838.p1	upregulated	AT4G25810
Acepa_067960.p1	upregulated	AT1G55265
Acepa_035820.p3	upregulated	AT1G21310
Acepa_037270.p1	upregulated	AT2G38110
Acepa_075802.p1	upregulated	AT5G06860
Acepa_025855.p1	upregulated	AT3G25780
Acepa_015016.p1	upregulated	AT5G06860
Acepa_068496.p1	upregulated	AT2G28100
Acepa_025326.p2	upregulated	AT5G20820
Acepa_053394.p1	upregulated	AT2G01150
Acepa_076667.p1	upregulated	AT3G21950
Acepa_037770.p2	upregulated	AT4G33070
Acepa_082648.p1	upregulated	-
Acepa_019963.p1	upregulated	AT1G60590
Acepa_068769.p1	upregulated	AT2G41480
Acepa_044552.p1	upregulated	AT3G47570
Acepa_018388.p1	upregulated	AT4G23160
Acepa_059802.p1	upregulated	AT5G60900
Acepa_094587.p1	upregulated	AT5G67550
Acepa_038962.p1	upregulated	AT3G54950
Acepa_075948.p1	upregulated	AT5G65810
Acepa_069443.p1	upregulated	-
Acepa_058364.p1	upregulated	AT1G76680
Acepa_104421.p1	upregulated	AT3G45140
Acepa_017042.p1	upregulated	AT4G05120
Acepa_005381.p1	upregulated	AT5G57550
Acepa_076673.p1	upregulated	AT3G21950
Acepa_038399.p1	upregulated	-
Acepa_068730.p1	upregulated	AT4G28690
Acepa_037340.p1	upregulated	AT5G12940
Acepa_014483.p1	upregulated	AT4G11290
Acepa_040512.p2	upregulated	AT5G17920
Acepa_047793.p1	upregulated	AT4G13510
Acepa_011751.p1	upregulated	AT3G06880
Acepa_032291.p2	upregulated	-
Acepa_092877.p1	upregulated	AT3G46640
Acepa_018544.p1	upregulated	AT2G40330
Acepa_051728.p1	upregulated	AT5G65780
Acepa_031376.p1	upregulated	-
Acepa_096797.p1	upregulated	AT3G54320
Acepa_077792.p1	upregulated	AT4G11290
Acepa_103929.p1	upregulated	-
Acepa_031114.p1	upregulated	AT1G21070
Acepa_077643.p1	upregulated	AT1G80160
Acepa_032719.p1	upregulated	-
Acepa_020751.p1	upregulated	AT1G68470
Acepa_041692.p1	upregulated	AT4G32870
Acepa_048285.p1	upregulated	-
Acepa_032123.p1	upregulated	AT5G46970
Acepa_016391.p1	upregulated	AT1G32170
Acepa_020399.p1	upregulated	AT3G50120
Acepa_058889.p1	upregulated	-
Acepa_019966.p2	upregulated	AT1G10640
Acepa_010724.p1	upregulated	AT1G02500
Acepa_036424.p2	upregulated	AT2G40540
Acepa_019770.p1	upregulated	AT1G79720
Acepa_032268.p1	upregulated	AT5G62940
Acepa_032966.p1	upregulated	-
Acepa_078307.p1	upregulated	AT4G19120
Acepa_026182.p1	upregulated	AT2G15780
Acepa_010218.p1	upregulated	AT5G62700
Acepa_039031.p2	upregulated	AT3G54700
Acepa_011615.p1	upregulated	AT5G06860
Acepa_072870.p1	upregulated	AT2G47240
Acepa_019503.p1	upregulated	AT1G62440
Acepa_069294.p1	upregulated	AT3G51520
Acepa_016962.p1	upregulated	AT3G21690
Acepa_029145.p1	upregulated	AT5G05340
Acepa_009044.p1	upregulated	AT2G44300
Acepa_023921.p1	upregulated	AT4G30420
Acepa_037902.p1	upregulated	-
Acepa_000818.p1	upregulated	AT1G02205
Acepa_033185.p1	upregulated	AT4G21020
Acepa_021862.p1	upregulated	AT2G15325
Acepa_039873.p1	upregulated	AT3G12580
Acepa_055336.p1	upregulated	AT1G67510
Acepa_039571.p1	upregulated	AT3G54950
Acepa_027404.p1	upregulated	AT1G19640
Acepa_036285.p1	upregulated	AT4G35160
Acepa_039055.p1	upregulated	AT4G35630
Acepa_067378.p1	upregulated	AT5G13330
Acepa_083263.p1	upregulated	AT3G23560
Acepa_026927.p1	upregulated	AT1G51630
Acepa_102141.p1	upregulated	AT2G45130
Acepa_038733.p1	upregulated	AT4G07960
Acepa_026928.p1	upregulated	AT1G51630
Acepa_075997.p1	upregulated	AT5G06060
Acepa_068524.p1	upregulated	AT1G64980
Acepa_022320.p1	upregulated	-
Acepa_006638.p1	upregulated	AT1G67070
Acepa_015985.p1	upregulated	AT4G39330
Acepa_027842.p1	upregulated	AT5G06860
Acepa_101553.p1	upregulated	AT4G07960
Acepa_054973.p1	upregulated	AT1G49670
Acepa_030500.p1	upregulated	AT2G22880
Acepa_040524.p1	upregulated	AT1G76680
Acepa_006883.p1	upregulated	AT1G08080
Acepa_102252.p1	upregulated	AT5G05340
Acepa_050999.p1	upregulated	AT2G25770
Acepa_006393.p1	upregulated	AT1G76690
Acepa_074560.p1	upregulated	AT5G55050
Acepa_029598.p1	upregulated	AT5G45280
Acepa_009871.p1	upregulated	AT4G06744
Acepa_072954.p1	upregulated	AT4G04020
Acepa_029149.p1	upregulated	AT2G32990
Acepa_040799.p1	upregulated	AT5G06390
Acepa_015921.p1	upregulated	AT4G34530
Acepa_101258.p1	upregulated	AT1G65840
Acepa_038606.p1	upregulated	AT5G57800
Acepa_045793.p1	upregulated	AT1G75750
Acepa_034111.p1	upregulated	AT1G70370
Acepa_080112.p1	upregulated	AT5G09220
Acepa_078163.p1	upregulated	AT1G79750
Acepa_017478.p1	upregulated	AT5G48930
Acepa_009133.p1	upregulated	AT4G39490
Acepa_012344.p1	upregulated	AT3G14390
Acepa_025062.p1	upregulated	AT4G39830
Acepa_039316.p1	upregulated	AT5G54160
Acepa_068882.p1	upregulated	-
Acepa_036600.p1	upregulated	AT2G17230
Acepa_032354.p1	upregulated	-
Acepa_102805.p1	upregulated	AT3G28580
Acepa_065463.p1	upregulated	AT3G02885
Acepa_028487.p1	upregulated	AT4G12730
Acepa_010818.p1	upregulated	AT1G10650
Acepa_077723.p1	upregulated	AT2G39770
Acepa_076396.p1	upregulated	AT4G23160
Acepa_065899.p1	upregulated	AT2G46490
Acepa_012199.p1	upregulated	AT5G01320
Acepa_101477.p1	upregulated	AT1G35250
Acepa_031645.p1	upregulated	AT3G63430
Acepa_038507.p1	upregulated	AT1G76680
Acepa_073186.p1	upregulated	AT5G24318
Acepa_069442.p1	upregulated	AT1G21280
Acepa_027843.p1	upregulated	AT5G06860
Acepa_042646.p1	upregulated	AT4G13940
Acepa_010489.p1	upregulated	AT5G03300
Acepa_096747.p2	upregulated	-
Acepa_027403.p1	upregulated	AT5G04370
Acepa_011468.p1	upregulated	AT5G52060
Acepa_023160.p1	upregulated	AT3G53190
Acepa_039610.p1	upregulated	AT2G37040
Acepa_022279.p1	upregulated	AT5G57150
Acepa_087872.p1	upregulated	AT4G32800
Acepa_016187.p1	upregulated	AT5G56980
Acepa_085460.p1	upregulated	AT5G02500
Acepa_041944.p1	upregulated	-
Acepa_096749.p1	upregulated	-
Acepa_036362.p1	upregulated	-
Acepa_033274.p1	upregulated	-
Acepa_038398.p2	upregulated	-
Acepa_074489.p1	upregulated	AT3G59220
Acepa_010562.p1	upregulated	AT4G11050
Acepa_028907.p1	upregulated	AT3G55120
Acepa_039942.p1	upregulated	AT1G55020
Acepa_039869.p3	upregulated	AT1G21310
Acepa_013622.p1	upregulated	AT1G65840
Acepa_101257.p1	upregulated	AT1G65840
Acepa_014217.p1	upregulated	AT5G08640
Acepa_016370.p1	upregulated	AT3G50330
Acepa_016961.p1	upregulated	AT3G21690
Acepa_080512.p1	upregulated	AT5G47450
Acepa_101911.p1	upregulated	AT4G24520
Acepa_013136.p1	upregulated	AT2G39130
Acepa_072953.p1	upregulated	-
Acepa_070640.p1	upregulated	AT3G04720
Acepa_024557.p1	upregulated	AT2G41510
Acepa_009518.p1	upregulated	AT4G22130
Acepa_042658.p1	upregulated	AT1G12570
Acepa_034143.p1	upregulated	AT1G10850
Acepa_018036.p1	upregulated	AT4G20170
Acepa_024872.p1	upregulated	AT3G58070
Acepa_008860.p1	upregulated	AT5G10770
Acepa_072878.p1	upregulated	AT5G24580
Acepa_066241.p1	upregulated	AT1G51090
Acepa_017834.p1	upregulated	AT1G56580
Acepa_036779.p1	upregulated	-
Acepa_039443.p1	upregulated	AT5G24580
Acepa_041811.p1	upregulated	AT1G34060
Acepa_015386.p1	upregulated	AT1G78240
Acepa_042560.p1	upregulated	AT2G31390
Acepa_039596.p1	upregulated	AT1G55020
Acepa_029033.p1	upregulated	AT3G51000
Acepa_011459.p1	upregulated	AT1G70370
Acepa_034215.p1	upregulated	AT1G34060
Acepa_071347.p1	upregulated	AT5G02230
Acepa_011466.p1	upregulated	AT5G62100
Acepa_022277.p1	upregulated	AT5G57150
Acepa_066190.p1	upregulated	AT3G05800
Acepa_056730.p1	upregulated	AT5G09220
Acepa_081108.p1	upregulated	AT5G28010
Acepa_016963.p1	upregulated	AT3G21690
Acepa_029694.p1	upregulated	AT1G76690
Acepa_018970.p1	upregulated	AT4G01870
Acepa_076184.p1	upregulated	AT2G25770
Acepa_038275.p1	upregulated	AT3G54250
Acepa_052393.p1	upregulated	AT3G48360
Acepa_039941.p1	upregulated	-
Acepa_030996.p1	upregulated	AT1G70280
Acepa_023532.p1	upregulated	AT4G35160
Acepa_019964.p1	upregulated	AT1G60590
Acepa_008859.p1	upregulated	AT5G10770
Acepa_011224.p1	upregulated	AT5G64300
Acepa_042313.p1	upregulated	AT1G55020
Acepa_028820.p1	upregulated	AT5G55730
Acepa_039535.p1	upregulated	AT5G10240
Acepa_027171.p1	upregulated	AT1G19180
Acepa_095966.p1	upregulated	AT5G20270
Acepa_012934.p1	upregulated	AT2G30490
Acepa_100746.p1	upregulated	AT5G45280
Acepa_011531.p1	upregulated	AT3G29670
Acepa_018191.p1	upregulated	AT4G39840
Acepa_021700.p1	upregulated	AT3G16370
Acepa_020595.p1	upregulated	AT4G13710
Acepa_082563.p1	upregulated	AT2G41490
Acepa_006367.p1	upregulated	AT1G58360
Acepa_040591.p1	upregulated	AT1G55020
Acepa_043239.p1	upregulated	AT5G12380
Acepa_039963.p1	upregulated	AT3G07990
Acepa_101446.p1	upregulated	AT1G15950
Acepa_073643.p1	upregulated	AT5G64570
Acepa_048751.p1	upregulated	AT1G51210
Acepa_037634.p1	upregulated	AT2G46960
Acepa_046545.p1	upregulated	AT4G15630
Acepa_043267.p1	upregulated	AT5G07050
Acepa_039273.p1	upregulated	AT3G12580
Acepa_015669.p1	upregulated	AT2G18969
Acepa_044353.p2	upregulated	AT5G05365
Acepa_041543.p2	upregulated	-
Acepa_096244.p1	upregulated	AT3G47340
Acepa_034684.p1	upregulated	AT2G30490
Acepa_045319.p1	upregulated	AT3G49720
Acepa_010647.p1	upregulated	AT2G26870
Acepa_098102.p1	upregulated	AT5G42170
Acepa_026482.p1	upregulated	AT3G52990
Acepa_011324.p1	upregulated	-
Acepa_103747.p1	upregulated	AT1G58360
Acepa_030499.p1	upregulated	AT2G22880
Acepa_039268.p1	upregulated	AT5G02500
Acepa_021200.p2	upregulated	AT4G24990
Acepa_085163.p1	upregulated	AT5G67020
Acepa_043100.p1	upregulated	AT5G54160
Acepa_047903.p2	upregulated	AT3G23550
Acepa_036830.p1	upregulated	AT1G11545
Acepa_079483.p1	upregulated	AT4G30420
Acepa_009748.p1	upregulated	AT4G25260
Acepa_044424.p1	upregulated	AT3G54950
Acepa_012876.p1	upregulated	AT1G25510
Acepa_045182.p1	upregulated	-
Acepa_035141.p1	upregulated	AT5G56890
Acepa_036139.p1	upregulated	AT2G32300
Acepa_037163.p1	upregulated	AT1G55020
Acepa_035872.p1	upregulated	AT5G66770
Acepa_080282.p1	upregulated	AT2G36780
Acepa_041657.p1	upregulated	AT5G60020
Acepa_083670.p1	upregulated	AT5G48930
Acepa_080478.p1	upregulated	-
Acepa_040310.p1	upregulated	-
Acepa_033031.p2	upregulated	-
Acepa_035250.p1	upregulated	AT2G39630
Acepa_032923.p1	upregulated	AT5G36910
Acepa_012797.p1	upregulated	AT5G66280
Acepa_072038.p1	upregulated	AT2G28900
Acepa_041085.p1	upregulated	AT1G68570
Acepa_010617.p1	upregulated	AT2G45130
Acepa_022596.p1	upregulated	AT1G19900
Acepa_095045.p1	upregulated	AT4G25830
Acepa_037487.p1	upregulated	AT1G24540
Acepa_041913.p1	upregulated	AT1G34060
Acepa_100919.p1	upregulated	AT1G33540
Acepa_027402.p1	upregulated	AT5G04370
Acepa_018059.p1	upregulated	AT3G23820
Acepa_014214.p1	upregulated	AT5G08640
Acepa_014817.p1	upregulated	AT5G42020
Acepa_076564.p1	upregulated	AT1G19180
Acepa_056907.p1	upregulated	AT1G08810
Acepa_079043.p1	upregulated	AT5G06860
Acepa_010369.p1	upregulated	AT4G25200
Acepa_052099.p1	upregulated	AT3G48410
Acepa_022738.p1	upregulated	AT3G12700
Acepa_047105.p1	upregulated	AT1G80160
Acepa_021706.p1	upregulated	AT1G78430
Acepa_077760.p1	upregulated	AT1G53820
Acepa_076668.p1	upregulated	AT5G38020
Acepa_009745.p1	upregulated	AT1G62760
Acepa_072287.p2	upregulated	AT3G49470
Acepa_042470.p2	upregulated	AT1G12240
Acepa_011657.p1	upregulated	AT4G37080
Acepa_078465.p1	upregulated	AT1G58420
Acepa_035733.p1	upregulated	AT5G45280
Acepa_106973.p1	upregulated	AT5G14980
Acepa_015890.p1	upregulated	AT1G09430
Acepa_013414.p2	upregulated	AT2G39770
Acepa_038174.p2	upregulated	AT1G76680
Acepa_008861.p1	upregulated	AT5G10770
Acepa_037034.p1	upregulated	AT1G45207
Acepa_029786.p1	upregulated	AT1G17840
Acepa_036025.p1	upregulated	AT3G49220
Acepa_011384.p1	downregulated	AT4G27450
Acepa_040192.p1	downregulated	AT3G46090
Acepa_045919.p1	downregulated	-
Acepa_034723.p1	downregulated	AT4G03510
Acepa_107844.p1	downregulated	AT1G76650
Acepa_012573.p1	downregulated	AT2G29420
Acepa_011823.p1	downregulated	AT1G14520
Acepa_051873.p2	downregulated	AT1G02640
Acepa_016583.p1	downregulated	AT1G13080
Acepa_084460.p1	downregulated	AT3G48360
Acepa_011641.p1	downregulated	AT5G03860
Acepa_040006.p4	downregulated	-
Acepa_011643.p1	downregulated	AT5G03860
Acepa_099923.p1	downregulated	AT1G01490
Acepa_045122.p1	downregulated	AT5G43700
Acepa_061091.p1	downregulated	-
Acepa_014720.p1	downregulated	AT1G75450
Acepa_101296.p1	downregulated	-
Acepa_056773.p1	downregulated	AT5G46050
Acepa_100812.p1	downregulated	AT2G41250
Acepa_102812.p1	downregulated	AT5G56550
Acepa_033858.p1	downregulated	AT5G46050
Acepa_016124.p2	downregulated	AT5G07470
Acepa_036987.p1	downregulated	AT1G22360
Acepa_054820.p1	downregulated	AT1G21890
Acepa_021506.p1	downregulated	AT3G11110
Acepa_072924.p1	downregulated	AT1G22360
Acepa_073411.p1	downregulated	AT5G06820
Acepa_040772.p1	downregulated	AT1G22360
Acepa_047688.p1	downregulated	AT2G28200
Acepa_098698.p1	downregulated	-
Acepa_015427.p1	downregulated	-
Acepa_095986.p1	downregulated	-
Acepa_071234.p1	downregulated	AT1G32170
Acepa_011827.p1	downregulated	AT5G20950
Acepa_075702.p2	downregulated	AT5G49360
Acepa_011819.p1	downregulated	AT1G14520
Acepa_080565.p1	downregulated	AT1G12240
Acepa_016125.p1	downregulated	AT5G07470
Acepa_014719.p1	downregulated	AT1G75450
Acepa_096653.p1	downregulated	AT2G18710
Acepa_037132.p4	downregulated	-
Acepa_047312.p1	downregulated	AT3G13690
Acepa_032494.p1	downregulated	AT3G04070
Acepa_022817.p1	downregulated	AT1G30820
Acepa_038158.p1	downregulated	AT3G09270
Acepa_031126.p1	downregulated	AT4G21970
Acepa_011818.p1	downregulated	AT1G14520
Acepa_084297.p1	downregulated	AT1G66235
Acepa_019838.p1	downregulated	AT1G02640
Acepa_046146.p1	downregulated	AT1G21000
Acepa_094442.p1	downregulated	AT1G78780
Acepa_024151.p1	downregulated	AT4G19850
Acepa_034720.p2	downregulated	AT3G48360
Acepa_073412.p1	downregulated	AT5G06820
Acepa_011383.p1	downregulated	AT3G15450
Acepa_070172.p1	downregulated	AT3G18690
Acepa_051872.p1	downregulated	AT1G02640
Acepa_077579.p1	downregulated	-
Acepa_036377.p2	downregulated	AT1G52340
Acepa_009310.p1	downregulated	AT1G19530
Acepa_036931.p2	downregulated	-
Acepa_026099.p1	downregulated	AT3G48360
Acepa_011824.p1	downregulated	AT5G04885
Acepa_102315.p1	downregulated	AT5G63800
Acepa_012820.p1	downregulated	AT1G72180
Acepa_011826.p1	downregulated	AT5G20950
Acepa_011644.p1	downregulated	AT5G03860
Acepa_033254.p1	downregulated	AT4G18650
Acepa_074086.p1	downregulated	AT2G37440
Acepa_023758.p2	downregulated	AT2G01050
Acepa_035782.p1	downregulated	-
Acepa_046456.p1	downregulated	AT2G16050
Acepa_042116.p2	downregulated	AT5G04370
Acepa_041130.p1	downregulated	AT5G46050
Acepa_061092.p1	downregulated	-
Acepa_019192.p1	downregulated	AT2G37240
Acepa_025877.p1	downregulated	AT3G24255
Acepa_023010.p1	downregulated	AT4G37340
Acepa_053263.p1	downregulated	AT5G42270
Acepa_043053.p2	downregulated	-
Acepa_058010.p1	downregulated	-
Acepa_015951.p1	downregulated	AT1G12240
Acepa_027006.p1	downregulated	AT3G16720
Acepa_094247.p1	downregulated	AT2G16050
Acepa_050617.p1	downregulated	AT5G58770
Acepa_013755.p1	downregulated	AT1G21000
Acepa_100627.p1	downregulated	-
Acepa_100811.p1	downregulated	AT2G41250
Acepa_100626.p1	downregulated	-

## Sheet: Asia-23 0 hpi vs 8 hpi
Gene ID	DE results	TAIR ID			GO annotatied transcripts
Acepa_076185.p1	upregulated	AT2G25770			Response to stress	Response to biotic stimulus
Acepa_100419.p1	upregulated	AT2G25770		Upregulated transcripts	115	60
Acepa_068523.p1	upregulated	AT1G64980		Downregulated transcripts	17	4
Acepa_014888.p1	upregulated	-
Acepa_047563.p1	upregulated	AT2G18340
Acepa_029607.p1	upregulated	-
Acepa_022533.p1	upregulated	AT1G20190
Acepa_054038.p1	upregulated	AT1G13680
Acepa_047449.p1	upregulated	AT1G08050
Acepa_000089.p1	upregulated	AT4G28310
Acepa_018543.p1	upregulated	AT2G40330
Acepa_099042.p1	upregulated	AT2G41510
Acepa_023144.p1	upregulated	AT1G21270
Acepa_103602.p1	upregulated	AT3G19000
Acepa_071545.p1	upregulated	AT3G15680
Acepa_019058.p1	upregulated	AT1G01050
Acepa_079701.p1	upregulated	-
Acepa_048450.p1	upregulated	AT4G10250
Acepa_059259.p1	upregulated	AT5G07990
Acepa_045996.p1	upregulated	AT5G43860
Acepa_069295.p1	upregulated	AT3G51520
Acepa_046742.p2	upregulated	AT1G18210
Acepa_032882.p1	upregulated	AT2G32300
Acepa_021069.p1	upregulated	AT1G23340
Acepa_080480.p1	upregulated	AT1G66550
Acepa_016262.p1	upregulated	AT5G67150
Acepa_028821.p1	upregulated	AT5G55730
Acepa_000182.p1	upregulated	AT3G45140
Acepa_050917.p1	upregulated	AT3G26590
Acepa_053632.p1	upregulated	AT1G66540
Acepa_094818.p1	upregulated	AT5G61160
Acepa_011591.p1	upregulated	AT5G15490
Acepa_010486.p1	upregulated	AT5G03300
Acepa_042408.p1	upregulated	AT1G62760
Acepa_048973.p1	upregulated	AT1G54970
Acepa_021565.p1	upregulated	AT2G46960
Acepa_015384.p1	upregulated	AT1G43760
Acepa_053737.p1	upregulated	AT3G16370
Acepa_092793.p2	upregulated	AT5G01740
Acepa_095657.p1	upregulated	AT1G14290
Acepa_102001.p3	upregulated	-
Acepa_035061.p1	upregulated	AT3G08030
Acepa_029786.p1	upregulated	AT1G17840
Acepa_022179.p1	upregulated	-
Acepa_024418.p1	upregulated	AT3G55620
Acepa_023007.p1	upregulated	AT5G06390
Acepa_015947.p1	upregulated	AT3G22600
Acepa_097139.p1	upregulated	AT1G68280
Acepa_036817.p1	upregulated	AT1G34040
Acepa_084002.p1	upregulated	AT5G04420
Acepa_021098.p1	upregulated	AT1G13110
Acepa_070341.p1	upregulated	AT3G09130
Acepa_047904.p1	upregulated	AT3G23560
Acepa_074928.p2	upregulated	AT1G10070
Acepa_034088.p1	upregulated	AT4G39490
Acepa_103102.p1	upregulated	AT2G19130
Acepa_014615.p1	upregulated	AT2G16440
Acepa_031178.p1	upregulated	AT2G43020
Acepa_043078.p1	upregulated	AT1G55020
Acepa_001350.p1	upregulated	-
Acepa_059260.p3	upregulated	AT1G33730
Acepa_067709.p2	upregulated	AT5G59845
Acepa_033904.p1	upregulated	AT3G06880
Acepa_043043.p1	upregulated	AT2G26640
Acepa_036439.p1	upregulated	AT2G39130
Acepa_035838.p1	upregulated	AT1G68530
Acepa_068770.p1	upregulated	AT2G41480
Acepa_016188.p1	upregulated	-
Acepa_024033.p1	upregulated	AT1G76240
Acepa_032176.p1	upregulated	AT1G05010
Acepa_081618.p1	upregulated	AT2G47140
Acepa_081286.p1	upregulated	AT1G19180
Acepa_042485.p1	upregulated	AT5G49810
Acepa_010488.p1	upregulated	AT5G03300
Acepa_077641.p1	upregulated	AT1G80160
Acepa_058196.p1	upregulated	AT2G47140
Acepa_014745.p1	upregulated	-
Acepa_068541.p3	upregulated	-
Acepa_044338.p1	upregulated	AT3G20390
Acepa_061163.p1	upregulated	AT5G50700
Acepa_045706.p1	upregulated	AT4G25700
Acepa_012619.p1	upregulated	AT5G03760
Acepa_033914.p1	upregulated	AT1G65010
Acepa_017048.p2	upregulated	AT4G20520
Acepa_016893.p1	upregulated	AT1G24360
Acepa_034509.p1	upregulated	AT1G62440
Acepa_070122.p1	upregulated	-
Acepa_020248.p1	upregulated	AT3G20390
Acepa_020558.p1	upregulated	AT3G51590
Acepa_029912.p1	upregulated	AT5G62220
Acepa_041691.p1	upregulated	AT2G20340
Acepa_012617.p1	upregulated	AT5G03760
Acepa_014448.p1	upregulated	AT1G08250
Acepa_031571.p1	upregulated	AT3G45140
Acepa_053092.p1	upregulated	AT2G20340
Acepa_051728.p1	upregulated	AT5G65780
Acepa_104418.p1	upregulated	AT3G45140
Acepa_072204.p1	upregulated	AT3G23250
Acepa_021706.p1	upregulated	AT1G78430
Acepa_025178.p1	upregulated	AT5G50200
Acepa_019391.p1	upregulated	AT3G23740
Acepa_017052.p1	upregulated	AT3G51590
Acepa_039496.p2	upregulated	AT1G21310
Acepa_006285.p1	upregulated	AT1G48100
Acepa_104773.p1	upregulated	AT4G23160
Acepa_084003.p1	upregulated	AT5G58330
Acepa_037350.p1	upregulated	AT5G13750
Acepa_103410.p1	upregulated	-
Acepa_095360.p1	upregulated	-
Acepa_095656.p1	upregulated	AT1G14290
Acepa_035197.p1	upregulated	AT4G39490
Acepa_071727.p1	upregulated	AT5G06720
Acepa_008921.p1	upregulated	AT2G26680
Acepa_020867.p1	upregulated	AT4G20520
Acepa_016713.p1	upregulated	AT5G05320
Acepa_039519.p1	upregulated	AT5G23420
Acepa_028393.p1	upregulated	-
Acepa_024321.p1	upregulated	ATMG01250
Acepa_082625.p1	upregulated	AT1G21270
Acepa_032414.p1	upregulated	AT5G46940
Acepa_092483.p1	upregulated	AT2G32300
Acepa_035295.p1	upregulated	AT3G19910
Acepa_084802.p1	upregulated	AT4G13930
Acepa_020651.p1	upregulated	AT3G30180
Acepa_105854.p1	upregulated	AT3G06035
Acepa_038053.p1	upregulated	AT2G40550
Acepa_021750.p1	upregulated	AT1G09310
Acepa_038166.p2	upregulated	AT3G50660
Acepa_102917.p1	upregulated	AT3G48740
Acepa_008817.p1	upregulated	AT1G55020
Acepa_010484.p1	upregulated	AT5G03300
Acepa_024138.p1	upregulated	AT2G46630
Acepa_036954.p1	upregulated	AT3G42170
Acepa_036693.p1	upregulated	AT1G21270
Acepa_031267.p1	upregulated	AT1G24540
Acepa_046270.p1	upregulated	-
Acepa_038398.p2	upregulated	-
Acepa_034223.p1	upregulated	AT1G76680
Acepa_081223.p1	upregulated	AT2G34930
Acepa_101473.p1	upregulated	AT1G75990
Acepa_052636.p1	upregulated	AT1G79750
Acepa_058195.p1	upregulated	AT2G47140
Acepa_034280.p1	upregulated	AT4G13710
Acepa_016030.p1	upregulated	AT1G77380
Acepa_030996.p1	upregulated	AT1G70280
Acepa_022567.p1	upregulated	AT5G50290
Acepa_035195.p2	upregulated	AT3G11080
Acepa_047631.p1	upregulated	AT5G06860
Acepa_037902.p1	upregulated	-
Acepa_042503.p1	upregulated	AT2G37790
Acepa_036526.p1	upregulated	AT5G20950
Acepa_029332.p1	upregulated	AT2G29570
Acepa_018544.p1	upregulated	AT2G40330
Acepa_029691.p1	upregulated	AT1G76690
Acepa_030071.p1	upregulated	AT2G29420
Acepa_015609.p1	upregulated	AT3G22142
Acepa_033185.p1	upregulated	AT4G21020
Acepa_096750.p1	upregulated	-
Acepa_075585.p1	upregulated	AT3G51460
Acepa_035567.p1	upregulated	AT1G76680
Acepa_093105.p1	upregulated	AT3G20390
Acepa_036237.p1	upregulated	-
Acepa_015817.p1	upregulated	AT4G12730
Acepa_072195.p1	upregulated	AT2G47460
Acepa_084533.p1	upregulated	AT2G45510
Acepa_049349.p1	upregulated	AT1G04040
Acepa_011855.p1	upregulated	-
Acepa_019233.p1	upregulated	AT2G36870
Acepa_083110.p1	upregulated	-
Acepa_045707.p1	upregulated	AT5G52570
Acepa_060671.p1	upregulated	AT1G34060
Acepa_050631.p1	upregulated	AT5G05340
Acepa_035680.p1	upregulated	AT4G20940
Acepa_045645.p1	upregulated	AT5G40780
Acepa_104772.p1	upregulated	AT4G23160
Acepa_033750.p2	upregulated	AT1G68530
Acepa_068481.p1	upregulated	AT2G18969
Acepa_030867.p1	upregulated	AT5G12020
Acepa_102134.p1	upregulated	AT3G59970
Acepa_071430.p1	upregulated	AT2G23180
Acepa_037639.p1	upregulated	AT4G11050
Acepa_019965.p1	upregulated	AT1G60590
Acepa_085007.p1	upregulated	AT1G49670
Acepa_103735.p1	upregulated	AT1G64060
Acepa_040866.p1	upregulated	AT4G31890
Acepa_037061.p1	upregulated	AT1G74670
Acepa_061105.p1	upregulated	AT1G43760
Acepa_069565.p1	upregulated	AT5G43860
Acepa_054218.p1	upregulated	-
Acepa_078769.p1	upregulated	AT2G35660
Acepa_083122.p1	upregulated	AT1G34060
Acepa_034912.p1	upregulated	AT1G21680
Acepa_082751.p1	upregulated	AT1G17020
Acepa_035459.p1	upregulated	AT1G62660
Acepa_093551.p1	upregulated	AT4G00880
Acepa_047448.p1	upregulated	AT5G60710
Acepa_035959.p1	upregulated	AT5G20950
Acepa_083120.p1	upregulated	AT1G34060
Acepa_034127.p1	upregulated	AT4G08770
Acepa_039239.p1	upregulated	AT5G45280
Acepa_077136.p1	upregulated	-
Acepa_039031.p2	upregulated	AT3G54700
Acepa_059820.p1	upregulated	AT4G28570
Acepa_051254.p2	upregulated	-
Acepa_023752.p1	upregulated	AT5G62700
Acepa_101331.p1	upregulated	AT4G14350
Acepa_081170.p1	upregulated	AT3G28580
Acepa_076061.p1	upregulated	AT1G49670
Acepa_023202.p1	upregulated	AT1G43760
Acepa_001065.p1	upregulated	AT3G21690
Acepa_055137.p1	upregulated	AT5G54160
Acepa_066993.p1	upregulated	AT1G16905
Acepa_055868.p2	upregulated	AT3G26300
Acepa_049184.p1	upregulated	-
Acepa_038127.p1	upregulated	AT5G49720
Acepa_071135.p1	upregulated	-
Acepa_096908.p1	upregulated	AT4G13080
Acepa_056972.p1	upregulated	AT3G13790
Acepa_035372.p1	upregulated	AT5G17920
Acepa_041465.p1	upregulated	AT4G34131
Acepa_038271.p1	upregulated	AT1G15950
Acepa_071977.p1	upregulated	-
Acepa_077756.p1	upregulated	AT1G53820
Acepa_037601.p1	upregulated	AT5G02500
Acepa_082241.p1	upregulated	AT2G45750
Acepa_046350.p1	upregulated	AT2G26640
Acepa_045186.p1	upregulated	AT2G15220
Acepa_059815.p1	upregulated	AT5G14180
Acepa_074801.p1	upregulated	AT5G20950
Acepa_082563.p1	upregulated	AT2G41490
Acepa_037466.p1	upregulated	AT5G37260
Acepa_021863.p1	upregulated	AT2G15325
Acepa_059605.p1	upregulated	ATMG00810
Acepa_082113.p1	upregulated	AT3G13790
Acepa_036857.p2	upregulated	AT1G43760
Acepa_037764.p1	upregulated	AT1G12240
Acepa_027918.p1	upregulated	AT1G20450
Acepa_059810.p1	upregulated	-
Acepa_075723.p1	upregulated	AT2G44940
Acepa_079401.p1	upregulated	-
Acepa_101472.p1	upregulated	AT1G75990
Acepa_043267.p1	upregulated	AT5G07050
Acepa_032240.p1	upregulated	AT4G39730
Acepa_076975.p1	upregulated	AT4G00430
Acepa_098058.p1	upregulated	AT5G06720
Acepa_018970.p1	upregulated	AT4G01870
Acepa_108967.p1	upregulated	AT1G65880
Acepa_076621.p1	upregulated	AT1G71110
Acepa_035193.p2	upregulated	-
Acepa_081928.p1	upregulated	AT5G07990
Acepa_052082.p1	upregulated	AT2G38290
Acepa_100920.p1	upregulated	AT1G33540
Acepa_039715.p1	upregulated	AT1G24020
Acepa_070639.p1	upregulated	AT3G04720
Acepa_041649.p1	upregulated	AT2G23180
Acepa_054022.p3	upregulated	-
Acepa_037634.p1	upregulated	AT2G46960
Acepa_040212.p1	upregulated	AT5G57800
Acepa_042685.p1	upregulated	AT1G13280
Acepa_026225.p1	upregulated	AT5G05170
Acepa_019503.p1	upregulated	AT1G62440
Acepa_040491.p1	upregulated	AT1G21310
Acepa_020653.p1	upregulated	AT3G30180
Acepa_019968.p1	upregulated	AT1G60590
Acepa_020042.p1	upregulated	AT2G01660
Acepa_042086.p1	upregulated	AT1G14290
Acepa_045793.p1	upregulated	AT1G75750
Acepa_037451.p1	upregulated	AT1G12240
Acepa_019393.p1	upregulated	AT3G23740
Acepa_036185.p1	upregulated	AT3G24255
Acepa_016382.p1	upregulated	AT1G02850
Acepa_011906.p1	upregulated	-
Acepa_055246.p1	upregulated	AT1G34040
Acepa_047903.p2	upregulated	AT3G23550
Acepa_074802.p1	upregulated	AT5G20950
Acepa_070280.p1	upregulated	AT3G23250
Acepa_036580.p1	upregulated	AT3G45140
Acepa_044353.p2	upregulated	AT5G05365
Acepa_023949.p1	upregulated	AT3G15820
Acepa_100746.p1	upregulated	AT5G45280
Acepa_034949.p1	upregulated	AT1G22400
Acepa_055133.p1	upregulated	AT5G54160
Acepa_060277.p1	upregulated	-
Acepa_032881.p1	upregulated	AT3G24255
Acepa_018821.p1	upregulated	AT1G23460
Acepa_088125.p2	upregulated	AT4G39730
Acepa_073396.p1	upregulated	AT2G41380
Acepa_007134.p1	upregulated	AT5G49460
Acepa_039813.p1	upregulated	AT5G48930
Acepa_036655.p1	upregulated	AT1G12240
Acepa_039954.p1	upregulated	AT4G11050
Acepa_079311.p1	upregulated	AT1G02850
Acepa_057200.p1	upregulated	AT1G53820
Acepa_034684.p1	upregulated	AT2G30490
Acepa_010444.p1	upregulated	AT2G45470
Acepa_029403.p1	upregulated	AT1G29640
Acepa_028666.p1	upregulated	-
Acepa_030228.p2	upregulated	-
Acepa_040655.p1	upregulated	AT1G21310
Acepa_037670.p1	upregulated	AT2G37040
Acepa_028809.p1	upregulated	AT2G40610
Acepa_024766.p1	upregulated	AT1G62660
Acepa_021584.p1	upregulated	AT4G28250
Acepa_103747.p1	upregulated	AT1G58360
Acepa_068859.p1	upregulated	AT3G28345
Acepa_005003.p1	upregulated	AT2G22760
Acepa_077160.p1	upregulated	AT5G10530
Acepa_014050.p1	upregulated	AT5G45280
Acepa_073858.p1	upregulated	AT1G44350
Acepa_031585.p1	upregulated	AT2G45050
Acepa_022088.p2	upregulated	AT3G24255
Acepa_023947.p2	upregulated	AT3G15820
Acepa_098329.p1	upregulated	AT5G67310
Acepa_023478.p1	upregulated	AT4G37850
Acepa_043146.p2	upregulated	AT1G34060
Acepa_054685.p1	upregulated	-
Acepa_041156.p1	upregulated	AT5G17540
Acepa_020697.p1	upregulated	AT2G01820
Acepa_058364.p1	upregulated	AT1G76680
Acepa_014269.p1	upregulated	AT1G12570
Acepa_103428.p1	upregulated	AT3G29750
Acepa_046832.p1	upregulated	-
Acepa_036384.p1	upregulated	AT4G37320
Acepa_039217.p1	upregulated	AT3G16520
Acepa_078151.p1	upregulated	AT3G24660
Acepa_038083.p1	upregulated	AT2G46960
Acepa_074560.p1	upregulated	AT5G55050
Acepa_066125.p2	upregulated	-
Acepa_042470.p2	upregulated	AT1G12240
Acepa_069764.p1	upregulated	AT4G25830
Acepa_032435.p1	upregulated	AT5G20060
Acepa_007251.p1	upregulated	AT1G23480
Acepa_040439.p1	upregulated	AT1G12240
Acepa_007253.p1	upregulated	AT5G03760
Acepa_041308.p1	upregulated	AT1G10070
Acepa_019961.p2	upregulated	AT1G10640
Acepa_067888.p1	upregulated	AT1G32540
Acepa_072607.p1	upregulated	AT4G17030
Acepa_096407.p1	upregulated	AT4G35160
Acepa_068370.p1	upregulated	AT4G11650
Acepa_051477.p1	upregulated	AT1G78380
Acepa_041499.p1	upregulated	AT5G44635
Acepa_074228.p1	upregulated	-
Acepa_071566.p1	upregulated	AT4G28310
Acepa_104013.p1	upregulated	AT1G68290
Acepa_040846.p1	upregulated	AT5G17920
Acepa_012658.p1	upregulated	AT1G45191
Acepa_051685.p1	upregulated	AT1G77330
Acepa_008818.p1	upregulated	AT1G55020
Acepa_041097.p1	upregulated	AT4G39330
Acepa_028706.p1	upregulated	AT5G10530
Acepa_081789.p2	upregulated	-
Acepa_001165.p1	upregulated	-
Acepa_037239.p4	upregulated	AT4G13710
Acepa_037587.p1	upregulated	AT3G10740
Acepa_041060.p1	upregulated	AT1G62660
Acepa_055900.p1	upregulated	AT1G66550
Acepa_076777.p1	upregulated	-
Acepa_034262.p1	upregulated	AT1G44900
Acepa_042710.p1	upregulated	AT1G08010
Acepa_009044.p1	upregulated	AT2G44300
Acepa_035820.p3	upregulated	AT1G21310
Acepa_025855.p1	upregulated	AT3G25780
Acepa_072954.p1	upregulated	AT4G04020
Acepa_039603.p1	upregulated	AT4G13940
Acepa_068882.p1	upregulated	-
Acepa_053394.p1	upregulated	AT2G01150
Acepa_029084.p1	upregulated	-
Acepa_075416.p1	upregulated	AT3G02600
Acepa_019963.p1	upregulated	AT1G60590
Acepa_044552.p1	upregulated	AT3G47570
Acepa_010932.p1	upregulated	AT1G22400
Acepa_104421.p1	upregulated	AT3G45140
Acepa_100566.p1	upregulated	AT2G17220
Acepa_041085.p1	upregulated	AT1G68570
Acepa_068730.p1	upregulated	AT4G28690
Acepa_014483.p1	upregulated	AT4G11290
Acepa_040512.p2	upregulated	AT5G17920
Acepa_047793.p1	upregulated	AT4G13510
Acepa_011751.p1	upregulated	AT3G06880
Acepa_032291.p2	upregulated	-
Acepa_100907.p1	upregulated	AT4G05020
Acepa_077792.p1	upregulated	AT4G11290
Acepa_103929.p1	upregulated	-
Acepa_032719.p1	upregulated	-
Acepa_020751.p1	upregulated	AT1G68470
Acepa_048285.p1	upregulated	-
Acepa_058889.p1	upregulated	-
Acepa_019966.p2	upregulated	AT1G10640
Acepa_093711.p1	upregulated	AT1G08230
Acepa_082646.p1	upregulated	-
Acepa_019770.p1	upregulated	AT1G79720
Acepa_032268.p1	upregulated	AT5G62940
Acepa_051682.p1	upregulated	AT1G77330
Acepa_099600.p1	upregulated	-
Acepa_026182.p1	upregulated	AT2G15780
Acepa_033011.p1	upregulated	AT5G61890
Acepa_029145.p1	upregulated	AT5G05340
Acepa_095838.p1	upregulated	AT4G25810
Acepa_023921.p1	upregulated	AT4G30420
Acepa_096746.p1	upregulated	AT5G28010
Acepa_021862.p1	upregulated	AT2G15325
Acepa_039873.p1	upregulated	AT3G12580
Acepa_056142.p1	upregulated	AT2G19130
Acepa_027404.p1	upregulated	AT1G19640
Acepa_067378.p1	upregulated	AT5G13330
Acepa_037894.p2	upregulated	AT1G49670
Acepa_075997.p1	upregulated	AT5G06060
Acepa_024419.p1	upregulated	AT3G55620
Acepa_015985.p1	upregulated	AT4G39330
Acepa_054973.p1	upregulated	AT1G49670
Acepa_040524.p1	upregulated	AT1G76680
Acepa_102252.p1	upregulated	AT5G05340
Acepa_006393.p1	upregulated	AT1G76690
Acepa_036933.p1	upregulated	AT3G60160
Acepa_048607.p2	upregulated	AT2G18180
Acepa_015016.p1	upregulated	AT5G06860
Acepa_029149.p1	upregulated	AT2G32990
Acepa_017047.p1	upregulated	-
Acepa_067766.p1	upregulated	AT1G18740
Acepa_034111.p1	upregulated	AT1G70370
Acepa_080112.p1	upregulated	AT5G09220
Acepa_068496.p1	upregulated	AT2G28100
Acepa_017478.p1	upregulated	AT5G48930
Acepa_009133.p1	upregulated	AT4G39490
Acepa_025062.p1	upregulated	AT4G39830
Acepa_039316.p1	upregulated	AT5G54160
Acepa_095045.p1	upregulated	AT4G25830
Acepa_102805.p1	upregulated	AT3G28580
Acepa_053627.p4	upregulated	AT4G37340
Acepa_065463.p1	upregulated	AT3G02885
Acepa_041913.p1	upregulated	AT1G34060
Acepa_028487.p1	upregulated	AT4G12730
Acepa_077723.p1	upregulated	AT2G39770
Acepa_078650.p1	upregulated	AT1G68750
Acepa_076396.p1	upregulated	AT4G23160
Acepa_069442.p1	upregulated	AT1G21280
Acepa_096797.p1	upregulated	AT3G54320
Acepa_101477.p1	upregulated	AT1G35250
Acepa_038507.p1	upregulated	AT1G76680
Acepa_065899.p1	upregulated	AT2G46490
Acepa_059802.p1	upregulated	AT5G60900
Acepa_081169.p1	upregulated	AT3G28580
Acepa_042646.p1	upregulated	AT4G13940
Acepa_075407.p1	upregulated	AT2G05990
Acepa_010489.p1	upregulated	AT5G03300
Acepa_027403.p1	upregulated	AT5G04370
Acepa_051681.p1	upregulated	AT1G77330
Acepa_037352.p1	upregulated	AT1G06520
Acepa_015374.p1	upregulated	AT1G77330
Acepa_035501.p1	upregulated	AT1G47710
Acepa_096749.p1	upregulated	-
Acepa_041543.p2	upregulated	-
Acepa_079473.p1	upregulated	AT2G38290
Acepa_074489.p1	upregulated	AT3G59220
Acepa_010562.p1	upregulated	AT4G11050
Acepa_039942.p1	upregulated	AT1G55020
Acepa_039869.p3	upregulated	AT1G21310
Acepa_013622.p1	upregulated	AT1G65840
Acepa_014217.p1	upregulated	AT5G08640
Acepa_016370.p1	upregulated	AT3G50330
Acepa_050303.p1	upregulated	AT5G53050
Acepa_082648.p1	upregulated	-
Acepa_072351.p1	upregulated	AT4G01700
Acepa_070640.p1	upregulated	AT3G04720
Acepa_042658.p1	upregulated	AT1G12570
Acepa_018036.p1	upregulated	AT4G20170
Acepa_074409.p1	upregulated	-
Acepa_047391.p1	upregulated	AT5G13930
Acepa_029033.p1	upregulated	AT3G51000
Acepa_034215.p1	upregulated	AT1G34060
Acepa_071347.p1	upregulated	AT5G02230
Acepa_021700.p1	upregulated	AT3G16370
Acepa_081108.p1	upregulated	AT5G28010
Acepa_029694.p1	upregulated	AT1G76690
Acepa_076184.p1	upregulated	AT2G25770
Acepa_029203.p1	upregulated	AT3G29670
Acepa_039941.p1	upregulated	-
Acepa_060080.p1	upregulated	AT1G61680
Acepa_055294.p1	upregulated	AT5G45280
Acepa_070120.p1	upregulated	-
Acepa_019964.p1	upregulated	AT1G60590
Acepa_008859.p1	upregulated	AT5G10770
Acepa_042313.p1	upregulated	AT1G55020
Acepa_019236.p1	upregulated	AT1G27680
Acepa_035241.p1	upregulated	AT3G52990
Acepa_011597.p1	upregulated	AT3G07320
Acepa_020595.p1	upregulated	AT4G13710
Acepa_054043.p1	upregulated	AT1G13680
Acepa_028481.p1	upregulated	AT2G01050
Acepa_036011.p1	upregulated	AT2G39050
Acepa_043239.p1	upregulated	AT5G12380
Acepa_039963.p1	upregulated	AT3G07990
Acepa_030707.p1	upregulated	AT3G12500
Acepa_082722.p1	upregulated	AT4G19390
Acepa_082340.p1	upregulated	AT4G10490
Acepa_018476.p1	upregulated	AT1G58170
Acepa_033274.p1	upregulated	-
Acepa_073663.p1	upregulated	AT1G44100
Acepa_098102.p1	upregulated	AT5G42170
Acepa_026482.p1	upregulated	AT3G52990
Acepa_011324.p1	upregulated	-
Acepa_053608.p1	upregulated	AT1G68750
Acepa_030499.p1	upregulated	AT2G22880
Acepa_021200.p2	upregulated	AT4G24990
Acepa_079483.p1	upregulated	AT4G30420
Acepa_045182.p1	upregulated	-
Acepa_035141.p1	upregulated	AT5G56890
Acepa_018598.p1	upregulated	AT5G65940
Acepa_067890.p1	upregulated	AT2G15760
Acepa_018388.p1	upregulated	AT4G23160
Acepa_094587.p1	upregulated	AT5G67550
Acepa_080282.p1	upregulated	AT2G36780
Acepa_067617.p1	upregulated	AT1G43160
Acepa_083670.p1	upregulated	AT5G48930
Acepa_040310.p1	upregulated	-
Acepa_036662.p1	upregulated	AT1G34040
Acepa_033031.p2	upregulated	-
Acepa_015466.p1	upregulated	AT5G24530
Acepa_072038.p1	upregulated	AT2G28900
Acepa_002359.p1	upregulated	AT1G26100
Acepa_037487.p1	upregulated	AT1G24540
Acepa_100919.p1	upregulated	AT1G33540
Acepa_027402.p1	upregulated	AT5G04370
Acepa_018059.p1	upregulated	AT3G23820
Acepa_014214.p1	upregulated	AT5G08640
Acepa_014817.p1	upregulated	AT5G42020
Acepa_047105.p1	upregulated	AT1G80160
Acepa_009745.p1	upregulated	AT1G62760
Acepa_072287.p2	upregulated	AT3G49470
Acepa_045896.p1	upregulated	AT5G67550
Acepa_078465.p1	upregulated	AT1G58420
Acepa_035733.p1	upregulated	AT5G45280
Acepa_038174.p2	upregulated	AT1G76680
Acepa_030962.p1	upregulated	AT5G17920
Acepa_015850.p1	downregulated	AT1G23870
Acepa_040192.p1	downregulated	AT3G46090
Acepa_045919.p1	downregulated	-
Acepa_034723.p1	downregulated	AT4G03510
Acepa_107844.p1	downregulated	AT1G76650
Acepa_012573.p1	downregulated	AT2G29420
Acepa_011823.p1	downregulated	AT1G14520
Acepa_016583.p1	downregulated	AT1G13080
Acepa_016563.p1	downregulated	AT1G65390
Acepa_051872.p1	downregulated	AT1G02640
Acepa_084460.p1	downregulated	AT3G48360
Acepa_016581.p1	downregulated	AT3G26300
Acepa_011641.p1	downregulated	AT5G03860
Acepa_040006.p4	downregulated	-
Acepa_011643.p1	downregulated	AT5G03860
Acepa_014720.p1	downregulated	AT1G75450
Acepa_053773.p2	downregulated	AT5G33320
Acepa_035215.p1	downregulated	AT5G63800
Acepa_056773.p1	downregulated	AT5G46050
Acepa_033858.p1	downregulated	AT5G46050
Acepa_016124.p2	downregulated	AT5G07470
Acepa_021506.p1	downregulated	AT3G11110
Acepa_043053.p2	downregulated	-
Acepa_098698.p1	downregulated	-
Acepa_044206.p1	downregulated	AT3G07350
Acepa_011819.p1	downregulated	AT1G14520
Acepa_080565.p1	downregulated	AT1G12240
Acepa_075702.p2	downregulated	AT5G49360
Acepa_016125.p1	downregulated	AT5G07470
Acepa_014719.p1	downregulated	AT1G75450
Acepa_011644.p1	downregulated	AT5G03860
Acepa_026099.p1	downregulated	AT3G48360
Acepa_102279.p1	downregulated	AT1G03090
Acepa_022817.p1	downregulated	AT1G30820
Acepa_035995.p1	downregulated	AT1G22770
Acepa_031126.p1	downregulated	AT4G21970
Acepa_011384.p1	downregulated	AT4G27450
Acepa_059265.p1	downregulated	AT5G06580
Acepa_049012.p2	downregulated	AT5G02020
Acepa_041721.p1	downregulated	AT5G63800
Acepa_019838.p1	downregulated	AT1G02640
Acepa_049543.p1	downregulated	AT4G13080
Acepa_034720.p2	downregulated	AT3G48360
Acepa_011383.p1	downregulated	AT3G15450
Acepa_050453.p1	downregulated	-
Acepa_077579.p1	downregulated	-
Acepa_036377.p2	downregulated	AT1G52340
Acepa_104009.p1	downregulated	AT5G22920
Acepa_033912.p1	downregulated	AT5G63800
Acepa_066388.p1	downregulated	-
Acepa_009310.p1	downregulated	AT1G19530
Acepa_036931.p2	downregulated	-
Acepa_049490.p1	downregulated	AT2G46790
Acepa_102315.p1	downregulated	AT5G63800
Acepa_012820.p1	downregulated	AT1G72180
Acepa_080386.p1	downregulated	AT1G76010
Acepa_022159.p1	downregulated	AT4G38470
Acepa_046456.p1	downregulated	AT2G16050
Acepa_101296.p1	downregulated	-
Acepa_041130.p1	downregulated	AT5G46050
Acepa_061092.p1	downregulated	-
Acepa_051873.p2	downregulated	AT1G02640
Acepa_025877.p1	downregulated	AT3G24255
Acepa_058010.p1	downregulated	-
Acepa_015951.p1	downregulated	AT1G12240
Acepa_014255.p1	downregulated	AT1G75540
Acepa_061091.p1	downregulated	-
Acepa_037280.p1	downregulated	AT5G07470
Acepa_023758.p2	downregulated	AT2G01050
Acepa_032020.p1	downregulated	-
Acepa_023298.p1	downregulated	AT2G23180
Acepa_100627.p1	downregulated	-
Acepa_100626.p1	downregulated	-

## Sheet: Asia-23 0 hpi vs 16 hpi
Gene ID	DE results	TAIR ID			GO annotatied transcripts
Acepa_076185.p1	upregulated	AT2G25770			Response to stress	Response to biotic stimulus
Acepa_072714.p1	upregulated	AT5G46050		Upregulated transcripts	131	57
Acepa_072879.p1	upregulated	AT5G24580		Downregulated transcripts	32	11
Acepa_100419.p1	upregulated	AT2G25770
Acepa_071344.p1	upregulated	AT3G56891
Acepa_021432.p1	upregulated	AT5G05340
Acepa_047563.p1	upregulated	AT2G18340
Acepa_012054.p1	upregulated	AT4G37520
Acepa_060679.p1	upregulated	AT3G21420
Acepa_100030.p1	upregulated	AT4G28365
Acepa_010806.p1	upregulated	AT1G66370
Acepa_029607.p1	upregulated	-
Acepa_022533.p1	upregulated	AT1G20190
Acepa_071447.p1	upregulated	AT2G40330
Acepa_028906.p1	upregulated	AT3G55120
Acepa_056201.p1	upregulated	AT1G69780
Acepa_000089.p1	upregulated	AT4G28310
Acepa_034509.p1	upregulated	AT1G62440
Acepa_037013.p1	upregulated	AT5G12940
Acepa_042555.p1	upregulated	AT1G67630
Acepa_071545.p1	upregulated	AT3G15680
Acepa_019058.p1	upregulated	AT1G01050
Acepa_079701.p1	upregulated	-
Acepa_056907.p1	upregulated	AT1G08810
Acepa_023410.p1	upregulated	AT5G09700
Acepa_072599.p1	upregulated	-
Acepa_081167.p1	upregulated	AT5G40010
Acepa_032882.p1	upregulated	AT2G32300
Acepa_021069.p1	upregulated	AT1G23340
Acepa_031254.p1	upregulated	AT1G14290
Acepa_016262.p1	upregulated	AT5G67150
Acepa_028821.p1	upregulated	AT5G55730
Acepa_070646.p1	upregulated	AT1G12110
Acepa_078525.p1	upregulated	AT3G26700
Acepa_094818.p1	upregulated	AT5G61160
Acepa_010486.p1	upregulated	AT5G03300
Acepa_042408.p1	upregulated	AT1G62760
Acepa_048973.p1	upregulated	AT1G54970
Acepa_037814.p1	upregulated	AT3G24480
Acepa_053737.p1	upregulated	AT3G16370
Acepa_068523.p1	upregulated	AT1G64980
Acepa_092793.p2	upregulated	AT5G01740
Acepa_021074.p1	upregulated	AT3G50560
Acepa_008941.p1	upregulated	AT1G11545
Acepa_035061.p1	upregulated	AT3G08030
Acepa_024033.p1	upregulated	AT1G76240
Acepa_039676.p1	upregulated	AT3G54400
Acepa_024418.p1	upregulated	AT3G55620
Acepa_041753.p1	upregulated	AT5G41880
Acepa_097139.p1	upregulated	AT1G68280
Acepa_009148.p2	upregulated	AT2G29550
Acepa_092028.p1	upregulated	AT2G39980
Acepa_036817.p1	upregulated	AT1G34040
Acepa_045318.p1	upregulated	AT3G49720
Acepa_070341.p1	upregulated	AT3G09130
Acepa_074928.p2	upregulated	AT1G10070
Acepa_012126.p1	upregulated	AT3G12145
Acepa_034088.p1	upregulated	AT4G39490
Acepa_015650.p1	upregulated	AT3G08600
Acepa_020246.p1	upregulated	AT3G20390
Acepa_070664.p1	upregulated	AT1G05370
Acepa_009749.p1	upregulated	AT5G62360
Acepa_042400.p1	upregulated	AT3G23840
Acepa_025448.p1	upregulated	AT3G10080
Acepa_068859.p1	upregulated	AT3G28345
Acepa_067709.p2	upregulated	AT5G59845
Acepa_035234.p1	upregulated	AT1G08030
Acepa_039603.p1	upregulated	AT4G13940
Acepa_099948.p1	upregulated	AT2G02860
Acepa_040117.p1	upregulated	AT3G61490
Acepa_035838.p1	upregulated	AT1G68530
Acepa_068770.p1	upregulated	AT2G41480
Acepa_075638.p1	upregulated	AT4G15920
Acepa_042485.p1	upregulated	AT5G49810
Acepa_012968.p1	upregulated	AT1G12280
Acepa_010488.p1	upregulated	AT5G03300
Acepa_058506.p1	upregulated	AT2G17230
Acepa_056072.p1	upregulated	AT5G06860
Acepa_096322.p2	upregulated	-
Acepa_040959.p1	upregulated	AT4G39830
Acepa_077641.p1	upregulated	AT1G80160
Acepa_029873.p1	upregulated	AT3G61750
Acepa_072399.p1	upregulated	AT5G59480
Acepa_058196.p1	upregulated	AT2G47140
Acepa_014745.p1	upregulated	-
Acepa_039031.p2	upregulated	AT3G54700
Acepa_105649.p1	upregulated	AT5G44210
Acepa_068541.p3	upregulated	-
Acepa_049348.p1	upregulated	AT1G04040
Acepa_009842.p1	upregulated	AT5G01710
Acepa_021700.p1	upregulated	AT3G16370
Acepa_097146.p1	upregulated	AT5G44020
Acepa_061163.p1	upregulated	AT5G50700
Acepa_045706.p1	upregulated	AT4G25700
Acepa_012619.p1	upregulated	AT5G03760
Acepa_033914.p1	upregulated	AT1G65010
Acepa_083686.p1	upregulated	AT5G03300
Acepa_018543.p1	upregulated	AT2G40330
Acepa_055776.p1	upregulated	AT5G09220
Acepa_023842.p1	upregulated	AT3G48990
Acepa_059141.p1	upregulated	-
Acepa_020558.p1	upregulated	AT3G51590
Acepa_029912.p1	upregulated	AT5G62220
Acepa_012617.p1	upregulated	AT5G03760
Acepa_080208.p1	upregulated	-
Acepa_014448.p1	upregulated	AT1G08250
Acepa_031571.p1	upregulated	AT3G45140
Acepa_041732.p1	upregulated	AT5G11880
Acepa_101331.p1	upregulated	AT4G14350
Acepa_053092.p1	upregulated	AT2G20340
Acepa_082884.p1	upregulated	AT3G51070
Acepa_051728.p1	upregulated	AT5G65780
Acepa_104418.p1	upregulated	AT3G45140
Acepa_013333.p1	upregulated	-
Acepa_034888.p1	upregulated	AT5G23660
Acepa_100029.p1	upregulated	AT4G28365
Acepa_068193.p1	upregulated	AT5G01740
Acepa_039496.p2	upregulated	AT1G21310
Acepa_006285.p1	upregulated	AT1G48100
Acepa_034111.p1	upregulated	AT1G70370
Acepa_037350.p1	upregulated	AT5G13750
Acepa_042971.p1	upregulated	AT3G15030
Acepa_035197.p1	upregulated	AT4G39490
Acepa_027844.p1	upregulated	AT5G06860
Acepa_095360.p1	upregulated	-
Acepa_012267.p1	upregulated	AT2G38110
Acepa_095656.p1	upregulated	AT1G14290
Acepa_035554.p1	upregulated	AT2G04780
Acepa_035271.p2	upregulated	AT1G21310
Acepa_071023.p1	upregulated	AT3G56200
Acepa_071586.p1	upregulated	AT4G15480
Acepa_044021.p1	upregulated	AT2G27470
Acepa_071727.p1	upregulated	AT5G06720
Acepa_084802.p1	upregulated	AT4G13930
Acepa_020867.p1	upregulated	AT4G20520
Acepa_001065.p1	upregulated	AT3G21690
Acepa_052757.p1	upregulated	AT4G16260
Acepa_065927.p1	upregulated	AT2G31670
Acepa_053159.p1	upregulated	AT5G57800
Acepa_020248.p1	upregulated	AT3G20390
Acepa_073482.p1	upregulated	AT5G41210
Acepa_028393.p1	upregulated	-
Acepa_052619.p1	upregulated	AT2G36970
Acepa_023533.p1	upregulated	AT4G35160
Acepa_041076.p1	upregulated	AT5G46220
Acepa_035459.p1	upregulated	AT1G62660
Acepa_092483.p1	upregulated	AT2G32300
Acepa_020927.p1	upregulated	AT1G76160
Acepa_035295.p1	upregulated	AT3G19910
Acepa_095583.p2	upregulated	AT1G08050
Acepa_037517.p2	upregulated	AT1G01060
Acepa_020274.p1	upregulated	AT4G05220
Acepa_070856.p2	upregulated	AT1G79160
Acepa_031663.p1	upregulated	AT2G39980
Acepa_020651.p1	upregulated	AT3G30180
Acepa_105854.p1	upregulated	AT3G06035
Acepa_038053.p1	upregulated	AT2G40550
Acepa_021750.p1	upregulated	AT1G09310
Acepa_038166.p2	upregulated	AT3G50660
Acepa_102917.p1	upregulated	AT3G48740
Acepa_010484.p1	upregulated	AT5G03300
Acepa_024138.p1	upregulated	AT2G46630
Acepa_036954.p1	upregulated	AT3G42170
Acepa_031148.p1	upregulated	-
Acepa_009890.p1	upregulated	AT5G13870
Acepa_042046.p1	upregulated	AT4G20940
Acepa_037765.p1	upregulated	AT3G61490
Acepa_046379.p1	upregulated	AT2G41760
Acepa_035726.p1	upregulated	AT5G38970
Acepa_048584.p1	upregulated	AT5G41920
Acepa_005294.p1	upregulated	AT1G14290
Acepa_039519.p1	upregulated	AT5G23420
Acepa_021585.p2	upregulated	-
Acepa_041658.p2	upregulated	AT2G40540
Acepa_034280.p1	upregulated	AT4G13710
Acepa_009892.p1	upregulated	AT5G13870
Acepa_055294.p1	upregulated	AT5G45280
Acepa_022567.p1	upregulated	AT5G50290
Acepa_022197.p1	upregulated	AT1G08080
Acepa_035195.p2	upregulated	AT3G11080
Acepa_068470.p1	upregulated	AT1G55210
Acepa_000182.p1	upregulated	AT3G45140
Acepa_055389.p2	upregulated	AT3G23980
Acepa_019978.p1	upregulated	AT1G08510
Acepa_047631.p1	upregulated	AT5G06860
Acepa_042503.p1	upregulated	AT2G37790
Acepa_034343.p1	upregulated	AT3G07990
Acepa_036526.p1	upregulated	AT5G20950
Acepa_093714.p1	upregulated	AT5G26330
Acepa_035057.p1	upregulated	AT2G23180
Acepa_036424.p2	upregulated	AT2G40540
Acepa_029145.p1	upregulated	AT5G05340
Acepa_096746.p1	upregulated	AT5G28010
Acepa_096323.p2	upregulated	-
Acepa_056073.p1	upregulated	AT5G06860
Acepa_093105.p1	upregulated	AT3G20390
Acepa_036237.p1	upregulated	-
Acepa_015817.p1	upregulated	AT4G12730
Acepa_022199.p1	upregulated	AT2G28210
Acepa_040799.p1	upregulated	AT5G06390
Acepa_023921.p1	upregulated	AT4G30420
Acepa_072195.p1	upregulated	AT2G47460
Acepa_041465.p1	upregulated	AT4G34131
Acepa_071430.p1	upregulated	AT2G23180
Acepa_011468.p1	upregulated	AT5G52060
Acepa_049349.p1	upregulated	AT1G04040
Acepa_053158.p1	upregulated	AT5G57800
Acepa_011467.p1	upregulated	AT5G52060
Acepa_020707.p3	upregulated	AT2G44160
Acepa_019233.p1	upregulated	AT2G36870
Acepa_023007.p1	upregulated	AT5G06390
Acepa_046671.p1	upregulated	AT3G20015
Acepa_045707.p1	upregulated	AT5G52570
Acepa_060671.p1	upregulated	AT1G34060
Acepa_035680.p1	upregulated	AT4G20940
Acepa_035241.p1	upregulated	AT3G52990
Acepa_033750.p2	upregulated	AT1G68530
Acepa_019236.p1	upregulated	AT1G27680
Acepa_067608.p1	upregulated	-
Acepa_099954.p1	upregulated	AT2G02860
Acepa_037639.p1	upregulated	AT4G11050
Acepa_083302.p1	upregulated	AT4G25260
Acepa_011657.p1	upregulated	AT4G37080
Acepa_103735.p1	upregulated	AT1G64060
Acepa_020677.p1	upregulated	AT5G02750
Acepa_040866.p1	upregulated	AT4G31890
Acepa_037061.p1	upregulated	AT1G74670
Acepa_094072.p1	upregulated	AT1G49480
Acepa_040229.p2	upregulated	AT1G02205
Acepa_083122.p1	upregulated	AT1G34060
Acepa_034477.p1	upregulated	AT4G19020
Acepa_095270.p1	upregulated	AT1G68530
Acepa_019976.p1	upregulated	AT1G08510
Acepa_036160.p1	upregulated	AT1G12240
Acepa_010346.p1	upregulated	-
Acepa_035959.p1	upregulated	AT5G20950
Acepa_083120.p1	upregulated	AT1G34060
Acepa_034127.p1	upregulated	AT4G08770
Acepa_039239.p1	upregulated	AT5G45280
Acepa_101568.p1	upregulated	-
Acepa_077136.p1	upregulated	-
Acepa_095775.p1	upregulated	AT3G45970
Acepa_083263.p1	upregulated	AT3G23560
Acepa_100887.p1	upregulated	AT1G51210
Acepa_023752.p1	upregulated	AT5G62700
Acepa_013744.p1	upregulated	AT1G30570
Acepa_081170.p1	upregulated	AT3G28580
Acepa_066156.p1	upregulated	AT1G64405
Acepa_074801.p1	upregulated	AT5G20950
Acepa_036322.p1	upregulated	AT1G12110
Acepa_045616.p1	upregulated	AT5G50710
Acepa_055137.p1	upregulated	AT5G54160
Acepa_055868.p2	upregulated	AT3G26300
Acepa_032414.p1	upregulated	AT5G46940
Acepa_056786.p2	upregulated	AT1G27450
Acepa_056972.p1	upregulated	AT3G13790
Acepa_035372.p1	upregulated	AT5G17920
Acepa_032268.p1	upregulated	AT5G62940
Acepa_031028.p1	upregulated	AT1G08050
Acepa_038271.p1	upregulated	AT1G15950
Acepa_050631.p1	upregulated	AT5G05340
Acepa_097960.p1	upregulated	AT5G17230
Acepa_076686.p1	upregulated	AT5G42720
Acepa_046350.p1	upregulated	AT2G26640
Acepa_005788.p1	upregulated	AT4G27435
Acepa_006884.p1	upregulated	AT1G08080
Acepa_082563.p1	upregulated	AT2G41490
Acepa_037466.p1	upregulated	AT5G37260
Acepa_021999.p2	upregulated	AT5G14920
Acepa_021863.p1	upregulated	AT2G15325
Acepa_025708.p1	upregulated	AT4G32940
Acepa_082113.p1	upregulated	AT3G13790
Acepa_035501.p1	upregulated	AT1G47710
Acepa_095657.p1	upregulated	AT1G14290
Acepa_037764.p1	upregulated	AT1G12240
Acepa_010800.p1	upregulated	AT1G65900
Acepa_019961.p2	upregulated	AT1G10640
Acepa_075723.p1	upregulated	AT2G44940
Acepa_079401.p1	upregulated	-
Acepa_069840.p2	upregulated	AT1G11700
Acepa_039049.p1	upregulated	AT2G42380
Acepa_101472.p1	upregulated	AT1G75990
Acepa_023771.p1	upregulated	AT1G71870
Acepa_043267.p1	upregulated	AT5G07050
Acepa_032240.p1	upregulated	AT4G39730
Acepa_076975.p1	upregulated	AT4G00430
Acepa_070280.p1	upregulated	AT3G23250
Acepa_098058.p1	upregulated	AT5G06720
Acepa_037643.p1	upregulated	AT5G23940
Acepa_018970.p1	upregulated	AT4G01870
Acepa_019223.p1	upregulated	AT5G05340
Acepa_076621.p1	upregulated	AT1G71110
Acepa_037894.p2	upregulated	AT1G49670
Acepa_035193.p2	upregulated	-
Acepa_016598.p1	upregulated	AT3G17470
Acepa_055264.p1	upregulated	AT2G37170
Acepa_096407.p1	upregulated	AT4G35160
Acepa_056811.p1	upregulated	AT3G63440
Acepa_044590.p1	upregulated	AT3G25980
Acepa_100920.p1	upregulated	AT1G33540
Acepa_041959.p1	upregulated	-
Acepa_017025.p1	upregulated	AT1G70710
Acepa_039715.p1	upregulated	AT1G24020
Acepa_009948.p1	upregulated	AT2G39700
Acepa_039818.p1	upregulated	AT5G66750
Acepa_070639.p1	upregulated	AT3G04720
Acepa_041649.p1	upregulated	AT2G23180
Acepa_054022.p3	upregulated	-
Acepa_025707.p1	upregulated	AT2G25940
Acepa_040212.p1	upregulated	AT5G57800
Acepa_042685.p1	upregulated	AT1G13280
Acepa_026225.p1	upregulated	AT5G05170
Acepa_066361.p1	upregulated	AT1G10550
Acepa_040491.p1	upregulated	AT1G21310
Acepa_006695.p1	upregulated	AT3G49720
Acepa_066993.p1	upregulated	AT1G16905
Acepa_019968.p1	upregulated	AT1G60590
Acepa_051792.p1	upregulated	AT1G17890
Acepa_020042.p1	upregulated	AT2G01660
Acepa_045207.p1	upregulated	-
Acepa_048607.p2	upregulated	AT2G18180
Acepa_045793.p1	upregulated	AT1G75750
Acepa_019232.p1	upregulated	AT2G36870
Acepa_096115.p1	upregulated	AT3G61490
Acepa_068291.p1	upregulated	-
Acepa_036185.p1	upregulated	AT3G24255
Acepa_049143.p1	upregulated	AT3G53620
Acepa_055246.p1	upregulated	AT1G34040
Acepa_074409.p1	upregulated	-
Acepa_098157.p1	upregulated	-
Acepa_074802.p1	upregulated	AT5G20950
Acepa_009078.p1	upregulated	AT5G28840
Acepa_023532.p1	upregulated	AT4G35160
Acepa_036580.p1	upregulated	AT3G45140
Acepa_044353.p2	upregulated	AT5G05365
Acepa_023949.p1	upregulated	AT3G15820
Acepa_100746.p1	upregulated	AT5G45280
Acepa_034949.p1	upregulated	AT1G22400
Acepa_055133.p1	upregulated	AT5G54160
Acepa_060277.p1	upregulated	-
Acepa_032881.p1	upregulated	AT3G24255
Acepa_018821.p1	upregulated	AT1G23460
Acepa_088125.p2	upregulated	AT4G39730
Acepa_073396.p1	upregulated	AT2G41380
Acepa_007134.p1	upregulated	AT5G49460
Acepa_016135.p1	upregulated	AT3G26700
Acepa_071067.p1	upregulated	AT4G38660
Acepa_036655.p1	upregulated	AT1G12240
Acepa_034521.p1	upregulated	AT3G16850
Acepa_034223.p1	upregulated	AT1G76680
Acepa_079311.p1	upregulated	AT1G02850
Acepa_057200.p1	upregulated	AT1G53820
Acepa_023981.p1	upregulated	AT3G08600
Acepa_010444.p1	upregulated	AT2G45470
Acepa_090420.p1	upregulated	AT2G45180
Acepa_030962.p1	upregulated	AT5G17920
Acepa_040655.p1	upregulated	AT1G21310
Acepa_037670.p1	upregulated	AT2G37040
Acepa_028809.p1	upregulated	AT2G40610
Acepa_042469.p2	upregulated	AT1G01060
Acepa_051861.p1	upregulated	AT1G25230
Acepa_022263.p1	upregulated	AT1G61667
Acepa_021584.p1	upregulated	AT4G28250
Acepa_029093.p1	upregulated	AT5G44640
Acepa_010671.p1	upregulated	AT2G17230
Acepa_039046.p1	upregulated	AT3G48990
Acepa_036856.p1	upregulated	AT2G40540
Acepa_030406.p1	upregulated	AT5G39660
Acepa_077910.p1	upregulated	AT1G76160
Acepa_081286.p1	upregulated	AT1G19180
Acepa_023507.p2	upregulated	AT2G29550
Acepa_034811.p1	upregulated	AT1G53700
Acepa_035081.p1	upregulated	AT3G21770
Acepa_040511.p1	upregulated	AT4G35160
Acepa_014615.p1	upregulated	AT2G16440
Acepa_023947.p2	upregulated	AT3G15820
Acepa_098329.p1	upregulated	AT5G67310
Acepa_023478.p1	upregulated	AT4G37850
Acepa_043146.p2	upregulated	AT1G34060
Acepa_022282.p1	upregulated	AT4G23930
Acepa_011324.p1	upregulated	-
Acepa_020697.p1	upregulated	AT2G01820
Acepa_011666.p1	upregulated	AT4G03210
Acepa_103428.p1	upregulated	AT3G29750
Acepa_031029.p1	upregulated	AT5G60710
Acepa_025863.p1	upregulated	AT1G12240
Acepa_037245.p1	upregulated	AT1G62400
Acepa_039217.p1	upregulated	AT3G16520
Acepa_072607.p1	upregulated	AT4G17030
Acepa_016021.p1	upregulated	AT1G10550
Acepa_067617.p1	upregulated	AT1G43160
Acepa_068481.p1	upregulated	AT2G18969
Acepa_043212.p1	upregulated	AT5G55710
Acepa_069764.p1	upregulated	AT4G25830
Acepa_045692.p1	upregulated	AT1G64980
Acepa_032435.p1	upregulated	AT5G20060
Acepa_053094.p2	upregulated	AT1G22370
Acepa_007251.p1	upregulated	AT1G23480
Acepa_090269.p1	upregulated	AT5G46940
Acepa_040439.p1	upregulated	AT1G12240
Acepa_022738.p1	upregulated	AT3G12700
Acepa_007253.p1	upregulated	AT5G03760
Acepa_041308.p1	upregulated	AT1G10070
Acepa_053575.p1	upregulated	AT3G21950
Acepa_016030.p1	upregulated	AT1G77380
Acepa_067888.p1	upregulated	AT1G32540
Acepa_042369.p1	upregulated	AT5G11880
Acepa_077756.p1	upregulated	AT1G53820
Acepa_051477.p1	upregulated	AT1G78380
Acepa_041499.p1	upregulated	AT5G44635
Acepa_017045.p1	upregulated	AT4G15800
Acepa_071566.p1	upregulated	AT4G28310
Acepa_005003.p1	upregulated	AT2G22760
Acepa_074386.p1	upregulated	AT1G49640
Acepa_030875.p1	upregulated	AT3G15680
Acepa_079043.p1	upregulated	AT5G06860
Acepa_012658.p1	upregulated	AT1G45191
Acepa_103427.p1	upregulated	AT3G29750
Acepa_041097.p1	upregulated	AT4G39330
Acepa_081789.p2	upregulated	-
Acepa_055393.p1	upregulated	AT3G07470
Acepa_044984.p1	upregulated	AT2G40435
Acepa_037239.p4	upregulated	AT4G13710
Acepa_041060.p1	upregulated	AT1G62660
Acepa_012575.p1	upregulated	AT4G00360
Acepa_029623.p1	upregulated	AT2G32280
Acepa_076777.p1	upregulated	-
Acepa_026018.p1	upregulated	AT4G17970
Acepa_013660.p1	upregulated	AT1G22330
Acepa_085162.p1	upregulated	AT3G45970
Acepa_001165.p1	upregulated	-
Acepa_080477.p1	upregulated	-
Acepa_042710.p1	upregulated	AT1G08010
Acepa_009044.p1	upregulated	AT2G44300
Acepa_080112.p1	upregulated	AT5G09220
Acepa_041123.p1	upregulated	AT1G12240
Acepa_035820.p3	upregulated	AT1G21310
Acepa_075802.p1	upregulated	AT5G06860
Acepa_025855.p1	upregulated	AT3G25780
Acepa_039578.p1	upregulated	AT1G47670
Acepa_015016.p1	upregulated	AT5G06860
Acepa_025326.p2	upregulated	AT5G20820
Acepa_073643.p1	upregulated	AT5G64570
Acepa_076667.p1	upregulated	AT3G21950
Acepa_082648.p1	upregulated	-
Acepa_019963.p1	upregulated	AT1G60590
Acepa_012344.p1	upregulated	AT3G14390
Acepa_094744.p1	upregulated	AT4G23820
Acepa_007042.p1	upregulated	AT1G14390
Acepa_075948.p1	upregulated	AT5G65810
Acepa_083670.p1	upregulated	AT5G48930
Acepa_104421.p1	upregulated	AT3G45140
Acepa_043068.p1	upregulated	AT2G46830
Acepa_076673.p1	upregulated	AT3G21950
Acepa_038399.p1	upregulated	-
Acepa_050221.p1	upregulated	-
Acepa_014483.p1	upregulated	AT4G11290
Acepa_040512.p2	upregulated	AT5G17920
Acepa_047793.p1	upregulated	AT4G13510
Acepa_011751.p1	upregulated	AT3G06880
Acepa_058628.p1	upregulated	AT5G17230
Acepa_092895.p1	upregulated	AT5G47610
Acepa_086085.p1	upregulated	AT5G54970
Acepa_077792.p1	upregulated	AT4G11290
Acepa_103929.p1	upregulated	-
Acepa_026103.p1	upregulated	AT5G15780
Acepa_020751.p1	upregulated	AT1G68470
Acepa_013441.p1	upregulated	AT2G25810
Acepa_018544.p1	upregulated	AT2G40330
Acepa_048285.p1	upregulated	-
Acepa_016391.p1	upregulated	AT1G32170
Acepa_019966.p2	upregulated	AT1G10640
Acepa_082646.p1	upregulated	-
Acepa_019770.p1	upregulated	AT1G79720
Acepa_037362.p1	upregulated	AT2G38080
Acepa_040310.p1	upregulated	-
Acepa_026182.p1	upregulated	AT2G15780
Acepa_029786.p1	upregulated	AT1G17840
Acepa_011615.p1	upregulated	AT5G06860
Acepa_040754.p1	upregulated	AT4G14960
Acepa_019503.p1	upregulated	AT1G62440
Acepa_033011.p1	upregulated	AT5G61890
Acepa_015609.p1	upregulated	AT3G22142
Acepa_095838.p1	upregulated	AT4G25810
Acepa_044156.p1	upregulated	-
Acepa_037902.p1	upregulated	-
Acepa_024257.p1	upregulated	-
Acepa_033185.p1	upregulated	AT4G21020
Acepa_019965.p1	upregulated	AT1G60590
Acepa_021862.p1	upregulated	AT2G15325
Acepa_037340.p1	upregulated	AT5G12940
Acepa_055336.p1	upregulated	AT1G67510
Acepa_072171.p1	upregulated	AT2G26710
Acepa_034262.p1	upregulated	AT1G44900
Acepa_027404.p1	upregulated	AT1G19640
Acepa_099951.p1	upregulated	AT2G02860
Acepa_036285.p1	upregulated	AT4G35160
Acepa_078014.p1	upregulated	AT2G16760
Acepa_067378.p1	upregulated	AT5G13330
Acepa_015329.p1	upregulated	AT1G76160
Acepa_009631.p2	upregulated	AT5G25460
Acepa_102141.p1	upregulated	AT2G45130
Acepa_028487.p1	upregulated	AT4G12730
Acepa_014956.p1	upregulated	AT5G67400
Acepa_024419.p1	upregulated	AT3G55620
Acepa_030280.p1	upregulated	AT5G46220
Acepa_015985.p1	upregulated	AT4G39330
Acepa_027842.p1	upregulated	AT5G06860
Acepa_022886.p1	upregulated	AT2G24490
Acepa_006883.p1	upregulated	AT1G08080
Acepa_047375.p1	upregulated	AT4G28100
Acepa_074560.p1	upregulated	AT5G55050
Acepa_032014.p1	upregulated	AT5G62430
Acepa_031390.p1	upregulated	-
Acepa_009871.p1	upregulated	AT4G06744
Acepa_029149.p1	upregulated	AT2G32990
Acepa_031117.p1	upregulated	AT4G37810
Acepa_015921.p1	upregulated	AT4G34530
Acepa_067766.p1	upregulated	AT1G18740
Acepa_067960.p1	upregulated	AT1G55265
Acepa_068496.p1	upregulated	AT2G28100
Acepa_017659.p1	upregulated	AT2G05790
Acepa_025062.p1	upregulated	AT4G39830
Acepa_039316.p1	upregulated	AT5G54160
Acepa_036600.p1	upregulated	AT2G17230
Acepa_095045.p1	upregulated	AT4G25830
Acepa_101477.p1	upregulated	AT1G35250
Acepa_102805.p1	upregulated	AT3G28580
Acepa_037451.p1	upregulated	AT1G12240
Acepa_065463.p1	upregulated	AT3G02885
Acepa_024766.p1	upregulated	AT1G62660
Acepa_016055.p1	upregulated	AT5G53420
Acepa_010818.p1	upregulated	AT1G10650
Acepa_042553.p1	upregulated	AT1G11580
Acepa_025620.p1	upregulated	AT3G54710
Acepa_038820.p3	upregulated	-
Acepa_009133.p1	upregulated	AT4G39490
Acepa_054300.p1	upregulated	AT4G32940
Acepa_038507.p1	upregulated	AT1G76680
Acepa_065899.p1	upregulated	AT2G46490
Acepa_027843.p1	upregulated	AT5G06860
Acepa_081169.p1	upregulated	AT3G28580
Acepa_053394.p1	upregulated	AT2G01150
Acepa_037352.p1	upregulated	AT1G06520
Acepa_042646.p1	upregulated	AT4G13940
Acepa_010489.p1	upregulated	AT5G03300
Acepa_024557.p1	upregulated	AT2G41510
Acepa_080314.p1	upregulated	AT2G37170
Acepa_025858.p1	upregulated	AT1G12240
Acepa_087872.p1	upregulated	AT4G32800
Acepa_041944.p1	upregulated	-
Acepa_074674.p1	upregulated	AT1G19025
Acepa_036362.p1	upregulated	-
Acepa_011906.p1	upregulated	-
Acepa_094743.p1	upregulated	AT4G23820
Acepa_098102.p1	upregulated	AT5G42170
Acepa_035890.p1	upregulated	AT4G19020
Acepa_074489.p1	upregulated	AT3G59220
Acepa_035141.p1	upregulated	AT5G56890
Acepa_028907.p1	upregulated	AT3G55120
Acepa_023812.p1	upregulated	AT2G33330
Acepa_047105.p1	upregulated	AT1G80160
Acepa_070516.p1	upregulated	AT3G18830
Acepa_096803.p2	upregulated	AT5G46050
Acepa_014217.p1	upregulated	AT5G08640
Acepa_028244.p1	upregulated	AT1G51090
Acepa_080512.p1	upregulated	AT5G47450
Acepa_021706.p1	upregulated	AT1G78430
Acepa_026700.p1	upregulated	AT5G58380
Acepa_072351.p1	upregulated	AT4G01700
Acepa_070640.p1	upregulated	AT3G04720
Acepa_009518.p1	upregulated	AT4G22130
Acepa_034143.p1	upregulated	AT1G10850
Acepa_018036.p1	upregulated	AT4G20170
Acepa_047903.p2	upregulated	AT3G23550
Acepa_072878.p1	upregulated	AT5G24580
Acepa_066241.p1	upregulated	AT1G51090
Acepa_037085.p1	upregulated	AT2G47160
Acepa_036779.p1	upregulated	-
Acepa_039443.p1	upregulated	AT5G24580
Acepa_041811.p1	upregulated	AT1G34060
Acepa_023160.p1	upregulated	AT3G53190
Acepa_047391.p1	upregulated	AT5G13930
Acepa_029033.p1	upregulated	AT3G51000
Acepa_011459.p1	upregulated	AT1G70370
Acepa_039954.p1	upregulated	AT4G11050
Acepa_034215.p1	upregulated	AT1G34060
Acepa_071347.p1	upregulated	AT5G02230
Acepa_011466.p1	upregulated	AT5G62100
Acepa_076668.p1	upregulated	AT5G38020
Acepa_049200.p1	upregulated	AT5G64570
Acepa_081108.p1	upregulated	AT5G28010
Acepa_076184.p1	upregulated	AT2G25770
Acepa_052393.p1	upregulated	AT3G48360
Acepa_039941.p1	upregulated	-
Acepa_030996.p1	upregulated	AT1G70280
Acepa_029203.p1	upregulated	AT3G29670
Acepa_019964.p1	upregulated	AT1G60590
Acepa_008859.p1	upregulated	AT5G10770
Acepa_028820.p1	upregulated	AT5G55730
Acepa_027171.p1	upregulated	AT1G19180
Acepa_095966.p1	upregulated	AT5G20270
Acepa_012934.p1	upregulated	AT2G30490
Acepa_026145.p2	upregulated	AT1G01490
Acepa_018191.p1	upregulated	AT4G39840
Acepa_011597.p1	upregulated	AT3G07320
Acepa_020595.p1	upregulated	AT4G13710
Acepa_035363.p1	upregulated	AT1G12460
Acepa_094856.p1	upregulated	AT5G42860
Acepa_084205.p1	upregulated	AT1G18880
Acepa_043239.p1	upregulated	AT5G12380
Acepa_039963.p1	upregulated	AT3G07990
Acepa_022070.p1	upregulated	AT3G18830
Acepa_048751.p1	upregulated	AT1G51210
Acepa_037634.p1	upregulated	AT2G46960
Acepa_015669.p1	upregulated	AT2G18969
Acepa_041543.p2	upregulated	-
Acepa_034684.p1	upregulated	AT2G30490
Acepa_010647.p1	upregulated	AT2G26870
Acepa_079473.p1	upregulated	AT2G38290
Acepa_026482.p1	upregulated	AT3G52990
Acepa_042360.p1	upregulated	AT1G68400
Acepa_044338.p1	upregulated	AT3G20390
Acepa_103747.p1	upregulated	AT1G58360
Acepa_027403.p1	upregulated	AT5G04370
Acepa_036830.p1	upregulated	AT1G11545
Acepa_079483.p1	upregulated	AT4G30420
Acepa_009748.p1	upregulated	AT4G25260
Acepa_012876.p1	upregulated	AT1G25510
Acepa_082882.p1	upregulated	AT5G64030
Acepa_010562.p1	upregulated	AT4G11050
Acepa_102134.p1	upregulated	AT3G59970
Acepa_018388.p1	upregulated	AT4G23160
Acepa_010932.p1	upregulated	AT1G22400
Acepa_041657.p1	upregulated	AT5G60020
Acepa_057159.p1	upregulated	AT1G18880
Acepa_080478.p1	upregulated	-
Acepa_042767.p1	upregulated	AT5G46280
Acepa_036662.p1	upregulated	AT1G34040
Acepa_033031.p2	upregulated	-
Acepa_026809.p1	upregulated	AT3G26310
Acepa_015331.p2	upregulated	AT1G76160
Acepa_099545.p1	upregulated	AT4G16260
Acepa_037176.p1	upregulated	AT5G65360
Acepa_072038.p1	upregulated	AT2G28900
Acepa_041085.p1	upregulated	AT1G68570
Acepa_010617.p1	upregulated	AT2G45130
Acepa_022596.p1	upregulated	AT1G19900
Acepa_002359.p1	upregulated	AT1G26100
Acepa_037487.p1	upregulated	AT1G24540
Acepa_041913.p1	upregulated	AT1G34060
Acepa_100919.p1	upregulated	AT1G33540
Acepa_027402.p1	upregulated	AT5G04370
Acepa_018059.p1	upregulated	AT3G23820
Acepa_014214.p1	upregulated	AT5G08640
Acepa_028775.p1	upregulated	AT5G66580
Acepa_068557.p1	upregulated	AT3G06890
Acepa_072400.p1	upregulated	AT5G02230
Acepa_023991.p1	upregulated	AT5G06860
Acepa_021075.p1	upregulated	AT3G50560
Acepa_039869.p3	upregulated	AT1G21310
Acepa_038083.p1	upregulated	AT2G46960
Acepa_059802.p1	upregulated	AT5G60900
Acepa_077760.p1	upregulated	AT1G53820
Acepa_036835.p1	upregulated	AT2G04160
Acepa_025860.p1	upregulated	AT1G12240
Acepa_009745.p1	upregulated	AT1G62760
Acepa_014744.p1	upregulated	-
Acepa_072287.p2	upregulated	AT3G49470
Acepa_042470.p2	upregulated	AT1G12240
Acepa_071418.p3	upregulated	-
Acepa_078465.p1	upregulated	AT1G58420
Acepa_035733.p1	upregulated	AT5G45280
Acepa_083954.p2	upregulated	-
Acepa_106973.p1	upregulated	AT5G14980
Acepa_086262.p1	upregulated	AT2G28780
Acepa_036025.p1	upregulated	AT3G49220
Acepa_053829.p1	downregulated	AT3G07350
Acepa_081445.p3	downregulated	AT2G25940
Acepa_015850.p1	downregulated	AT1G23870
Acepa_031970.p1	downregulated	AT5G50360
Acepa_045919.p1	downregulated	-
Acepa_102568.p1	downregulated	AT2G25770
Acepa_031995.p1	downregulated	AT4G19850
Acepa_107844.p1	downregulated	AT1G76650
Acepa_078239.p1	downregulated	AT1G62660
Acepa_078330.p1	downregulated	AT3G13750
Acepa_061092.p1	downregulated	-
Acepa_016583.p1	downregulated	AT1G13080
Acepa_040807.p1	downregulated	AT1G08320
Acepa_022290.p1	downregulated	AT1G01320
Acepa_010560.p1	downregulated	AT1G20510
Acepa_084460.p1	downregulated	AT3G48360
Acepa_049012.p2	downregulated	AT5G02020
Acepa_061127.p2	downregulated	AT5G24950
Acepa_011641.p1	downregulated	AT5G03860
Acepa_040006.p4	downregulated	-
Acepa_011643.p1	downregulated	AT5G03860
Acepa_099923.p1	downregulated	AT1G01490
Acepa_076034.p1	downregulated	AT3G11180
Acepa_079650.p1	downregulated	AT1G01490
Acepa_061091.p1	downregulated	-
Acepa_004219.p1	downregulated	AT1G78160
Acepa_056773.p1	downregulated	AT5G46050
Acepa_102812.p1	downregulated	AT5G56550
Acepa_033858.p1	downregulated	AT5G46050
Acepa_096511.p1	downregulated	AT2G42620
Acepa_021506.p1	downregulated	AT3G11110
Acepa_082879.p1	downregulated	AT2G33770
Acepa_098134.p1	downregulated	AT3G22970
Acepa_042849.p1	downregulated	AT2G46570
Acepa_001090.p1	downregulated	AT5G16340
Acepa_040772.p1	downregulated	AT1G22360
Acepa_047812.p1	downregulated	AT1G68050
Acepa_066664.p1	downregulated	AT2G29380
Acepa_015427.p1	downregulated	-
Acepa_014079.p2	downregulated	AT2G15890
Acepa_036377.p2	downregulated	AT1G52340
Acepa_057408.p1	downregulated	AT1G79040
Acepa_102215.p1	downregulated	AT5G13630
Acepa_025314.p1	downregulated	AT3G10020
Acepa_009700.p1	downregulated	AT5G44680
Acepa_078838.p1	downregulated	AT4G19850
Acepa_076592.p1	downregulated	AT2G39210
Acepa_075702.p2	downregulated	AT5G49360
Acepa_094276.p1	downregulated	AT1G79040
Acepa_028218.p1	downregulated	AT1G56600
Acepa_013520.p1	downregulated	AT1G75950
Acepa_080565.p1	downregulated	AT1G12240
Acepa_032366.p1	downregulated	AT1G53035
Acepa_015679.p1	downregulated	AT5G50920
Acepa_010302.p1	downregulated	AT1G79040
Acepa_064395.p1	downregulated	AT5G03230
Acepa_020798.p1	downregulated	-
Acepa_104535.p1	downregulated	AT4G28080
Acepa_009037.p2	downregulated	AT1G62660
Acepa_100650.p1	downregulated	-
Acepa_009701.p1	downregulated	AT5G44680
Acepa_037716.p1	downregulated	AT5G02810
Acepa_009698.p1	downregulated	AT5G44680
Acepa_010678.p1	downregulated	AT3G13750
Acepa_035995.p1	downregulated	AT1G22770
Acepa_031126.p1	downregulated	AT4G21970
Acepa_016643.p1	downregulated	AT3G03990
Acepa_011384.p1	downregulated	AT4G27450
Acepa_071039.p1	downregulated	AT3G24760
Acepa_017164.p1	downregulated	AT2G25900
Acepa_035880.p1	downregulated	AT3G13750
Acepa_019838.p1	downregulated	AT1G02640
Acepa_025628.p1	downregulated	AT3G46130
Acepa_010676.p1	downregulated	AT3G13750
Acepa_081444.p1	downregulated	AT4G32940
Acepa_046146.p1	downregulated	AT1G21000
Acepa_008298.p1	downregulated	AT3G07160
Acepa_014109.p1	downregulated	AT2G34140
Acepa_058275.p1	downregulated	AT4G01080
Acepa_034720.p2	downregulated	AT3G48360
Acepa_102315.p1	downregulated	AT5G63800
Acepa_011031.p1	downregulated	AT5G02810
Acepa_061294.p1	downregulated	AT1G22240
Acepa_011383.p1	downregulated	AT3G15450
Acepa_033807.p1	downregulated	AT4G32940
Acepa_078234.p1	downregulated	AT1G62660
Acepa_051872.p1	downregulated	AT1G02640
Acepa_077579.p1	downregulated	-
Acepa_039218.p1	downregulated	AT5G04040
Acepa_014681.p1	downregulated	AT1G56220
Acepa_040192.p1	downregulated	AT3G46090
Acepa_036877.p1	downregulated	AT5G02810
Acepa_069974.p1	downregulated	-
Acepa_042871.p1	downregulated	AT1G15740
Acepa_012573.p1	downregulated	AT2G29420
Acepa_055174.p1	downregulated	AT5G61960
Acepa_099921.p1	downregulated	AT1G01490
Acepa_009310.p1	downregulated	AT1G19530
Acepa_032463.p1	downregulated	-
Acepa_036931.p2	downregulated	-
Acepa_030830.p1	downregulated	AT1G06330
Acepa_012820.p1	downregulated	AT1G72180
Acepa_011644.p1	downregulated	AT5G03860
Acepa_070472.p1	downregulated	AT1G56600
Acepa_096594.p1	downregulated	-
Acepa_032261.p2	downregulated	AT1G71000
Acepa_022159.p1	downregulated	AT4G38470
Acepa_078578.p1	downregulated	AT3G07350
Acepa_081336.p1	downregulated	AT3G22970
Acepa_041186.p1	downregulated	AT5G02810
Acepa_014680.p1	downregulated	AT1G56220
Acepa_087765.p1	downregulated	AT4G08330
Acepa_041130.p1	downregulated	AT5G46050
Acepa_051873.p2	downregulated	AT1G02640
Acepa_019192.p1	downregulated	AT2G37240
Acepa_025877.p1	downregulated	AT3G24255
Acepa_011109.p1	downregulated	AT3G07350
Acepa_013340.p1	downregulated	AT1G08320
Acepa_043053.p2	downregulated	-
Acepa_015127.p1	downregulated	AT3G22970
Acepa_015951.p1	downregulated	AT1G12240
Acepa_027006.p1	downregulated	AT3G16720
Acepa_054998.p1	downregulated	AT1G01490
Acepa_036987.p1	downregulated	AT1G22360
Acepa_032262.p1	downregulated	AT1G71000
Acepa_067821.p1	downregulated	-
Acepa_013755.p1	downregulated	AT1G21000
Acepa_093943.p1	downregulated	AT5G03795
Acepa_061182.p1	downregulated	AT4G35160
Acepa_032020.p1	downregulated	-
Acepa_023298.p1	downregulated	AT2G23180
Acepa_056502.p1	downregulated	AT5G50920
Acepa_094987.p1	downregulated	AT2G40340
Acepa_100627.p1	downregulated	-
Acepa_052077.p1	downregulated	AT2G38290
Acepa_100626.p1	downregulated	-

## Sheet: Asia-23 0 hpi vs 24 hpi
Gene ID	DE results	TAIR ID			GO annotatied transcripts
Acepa_068980.p1	upregulated	AT1G27730			Response to stress	Response to biotic stimulus
Acepa_076185.p1	upregulated	AT2G25770		Upregulated transcripts	130	61
Acepa_100419.p1	upregulated	AT2G25770		Downregulated transcripts	22	8
Acepa_011661.p1	upregulated	AT5G02070
Acepa_010806.p1	upregulated	AT1G66370
Acepa_021432.p1	upregulated	AT5G05340
Acepa_077695.p1	upregulated	AT5G65980
Acepa_027380.p1	upregulated	AT3G12170
Acepa_060679.p1	upregulated	AT3G21420
Acepa_009523.p1	upregulated	-
Acepa_022533.p1	upregulated	AT1G20190
Acepa_024647.p1	upregulated	AT2G22880
Acepa_028906.p1	upregulated	AT3G55120
Acepa_047449.p1	upregulated	AT1G08050
Acepa_000089.p1	upregulated	AT4G28310
Acepa_018543.p1	upregulated	AT2G40330
Acepa_080208.p1	upregulated	-
Acepa_042555.p1	upregulated	AT1G67630
Acepa_103602.p1	upregulated	AT3G19000
Acepa_017555.p1	upregulated	AT1G75220
Acepa_017052.p1	upregulated	AT3G51590
Acepa_027404.p1	upregulated	AT1G19640
Acepa_046742.p2	upregulated	AT1G18210
Acepa_032882.p1	upregulated	AT2G32300
Acepa_020274.p1	upregulated	AT4G05220
Acepa_017917.p3	upregulated	AT1G67590
Acepa_072185.p1	upregulated	AT4G11600
Acepa_083122.p1	upregulated	AT1G34060
Acepa_028821.p1	upregulated	AT5G55730
Acepa_034477.p1	upregulated	AT4G19020
Acepa_053632.p1	upregulated	AT1G66540
Acepa_094818.p1	upregulated	AT5G61160
Acepa_011591.p1	upregulated	AT5G15490
Acepa_010486.p1	upregulated	AT5G03300
Acepa_042408.p1	upregulated	AT1G62760
Acepa_048973.p1	upregulated	AT1G54970
Acepa_037814.p1	upregulated	AT3G24480
Acepa_053737.p1	upregulated	AT3G16370
Acepa_068523.p1	upregulated	AT1G64980
Acepa_092793.p2	upregulated	AT5G01740
Acepa_081111.p1	upregulated	AT2G40330
Acepa_004919.p1	upregulated	AT3G54060
Acepa_024033.p1	upregulated	AT1G76240
Acepa_033620.p1	upregulated	AT1G07790
Acepa_009518.p1	upregulated	AT4G22130
Acepa_041753.p1	upregulated	AT5G41880
Acepa_015947.p1	upregulated	AT3G22600
Acepa_097139.p1	upregulated	AT1G68280
Acepa_009148.p2	upregulated	AT2G29550
Acepa_036817.p1	upregulated	AT1G34040
Acepa_092467.p1	upregulated	AT1G67730
Acepa_021646.p1	upregulated	AT4G34200
Acepa_047904.p1	upregulated	AT3G23560
Acepa_074928.p2	upregulated	AT1G10070
Acepa_012126.p1	upregulated	AT3G12145
Acepa_034088.p1	upregulated	AT4G39490
Acepa_011986.p1	upregulated	AT3G05740
Acepa_020246.p1	upregulated	AT3G20390
Acepa_088439.p1	upregulated	AT1G53540
Acepa_031082.p1	upregulated	AT3G07990
Acepa_009749.p1	upregulated	AT5G62360
Acepa_024030.p1	upregulated	AT1G63120
Acepa_025448.p1	upregulated	AT3G10080
Acepa_079091.p1	upregulated	AT5G23760
Acepa_042658.p1	upregulated	AT1G12570
Acepa_046699.p1	upregulated	AT4G37260
Acepa_067709.p2	upregulated	AT5G59845
Acepa_043043.p1	upregulated	AT2G26640
Acepa_035234.p1	upregulated	AT1G08030
Acepa_040117.p1	upregulated	AT3G61490
Acepa_035838.p1	upregulated	AT1G68530
Acepa_077792.p1	upregulated	AT4G11290
Acepa_035566.p1	upregulated	AT1G67320
Acepa_042180.p1	upregulated	AT2G47160
Acepa_078151.p1	upregulated	AT3G24660
Acepa_081618.p1	upregulated	AT2G47140
Acepa_081286.p1	upregulated	AT1G19180
Acepa_055051.p1	upregulated	AT2G29570
Acepa_042485.p1	upregulated	AT5G49810
Acepa_006393.p1	upregulated	AT1G76690
Acepa_012968.p1	upregulated	AT1G12280
Acepa_010488.p1	upregulated	AT5G03300
Acepa_039903.p1	upregulated	AT1G22610
Acepa_058506.p1	upregulated	AT2G17230
Acepa_056072.p1	upregulated	AT5G06860
Acepa_040959.p1	upregulated	AT4G39830
Acepa_047418.p1	upregulated	AT1G24360
Acepa_029873.p1	upregulated	AT3G61750
Acepa_058196.p1	upregulated	AT2G47140
Acepa_014745.p1	upregulated	-
Acepa_039031.p2	upregulated	AT3G54700
Acepa_105649.p1	upregulated	AT5G44210
Acepa_021700.p1	upregulated	AT3G16370
Acepa_038053.p1	upregulated	AT2G40550
Acepa_061163.p1	upregulated	AT5G50700
Acepa_045706.p1	upregulated	AT4G25700
Acepa_012619.p1	upregulated	AT5G03760
Acepa_033914.p1	upregulated	AT1G65010
Acepa_016893.p1	upregulated	AT1G24360
Acepa_083686.p1	upregulated	AT5G03300
Acepa_034509.p1	upregulated	AT1G62440
Acepa_055776.p1	upregulated	AT5G09220
Acepa_020558.p1	upregulated	AT3G51590
Acepa_029912.p1	upregulated	AT5G62220
Acepa_041691.p1	upregulated	AT2G20340
Acepa_012617.p1	upregulated	AT5G03760
Acepa_102052.p1	upregulated	AT2G20340
Acepa_014448.p1	upregulated	AT1G08250
Acepa_041732.p1	upregulated	AT5G11880
Acepa_053092.p1	upregulated	AT2G20340
Acepa_051728.p1	upregulated	AT5G65780
Acepa_072204.p1	upregulated	AT3G23250
Acepa_040063.p1	upregulated	AT2G20680
Acepa_023652.p1	upregulated	-
Acepa_021706.p1	upregulated	AT1G78430
Acepa_025178.p1	upregulated	AT5G50200
Acepa_035554.p1	upregulated	AT2G04780
Acepa_022729.p1	upregulated	AT1G22410
Acepa_083676.p2	upregulated	AT5G57840
Acepa_068193.p1	upregulated	AT5G01740
Acepa_039496.p2	upregulated	AT1G21310
Acepa_022405.p1	upregulated	AT4G36220
Acepa_017918.p1	upregulated	AT1G67590
Acepa_104773.p1	upregulated	AT4G23160
Acepa_055869.p1	upregulated	AT3G48270
Acepa_037350.p1	upregulated	AT5G13750
Acepa_032268.p1	upregulated	AT5G62940
Acepa_023410.p1	upregulated	AT5G09700
Acepa_027844.p1	upregulated	AT5G06860
Acepa_035460.p3	upregulated	AT1G23200
Acepa_095360.p1	upregulated	-
Acepa_095656.p1	upregulated	AT1G14290
Acepa_069186.p1	upregulated	AT1G08880
Acepa_035271.p2	upregulated	AT1G21310
Acepa_035197.p1	upregulated	AT4G39490
Acepa_044021.p1	upregulated	AT2G27470
Acepa_071727.p1	upregulated	AT5G06720
Acepa_084802.p1	upregulated	AT4G13930
Acepa_052757.p1	upregulated	AT4G16260
Acepa_039519.p1	upregulated	AT5G23420
Acepa_099600.p1	upregulated	-
Acepa_073482.p1	upregulated	AT5G41210
Acepa_028393.p1	upregulated	-
Acepa_037376.p1	upregulated	AT4G36360
Acepa_072195.p1	upregulated	AT2G47460
Acepa_052619.p1	upregulated	AT2G36970
Acepa_032326.p1	upregulated	-
Acepa_023533.p1	upregulated	AT4G35160
Acepa_024841.p1	upregulated	AT2G27140
Acepa_005686.p1	upregulated	AT3G59340
Acepa_017097.p1	upregulated	AT4G24380
Acepa_035459.p1	upregulated	AT1G62660
Acepa_092483.p1	upregulated	AT2G32300
Acepa_014050.p1	upregulated	AT5G45280
Acepa_031254.p1	upregulated	AT1G14290
Acepa_100286.p1	upregulated	AT2G31390
Acepa_055947.p1	upregulated	AT2G30490
Acepa_035057.p1	upregulated	AT2G23180
Acepa_020651.p1	upregulated	AT3G30180
Acepa_105854.p1	upregulated	AT3G06035
Acepa_085159.p1	upregulated	AT3G45970
Acepa_021750.p1	upregulated	AT1G09310
Acepa_038166.p2	upregulated	AT3G50660
Acepa_010484.p1	upregulated	AT5G03300
Acepa_024138.p1	upregulated	AT2G46630
Acepa_016152.p1	upregulated	AT4G13710
Acepa_031148.p1	upregulated	-
Acepa_076184.p1	upregulated	AT2G25770
Acepa_042046.p1	upregulated	AT4G20940
Acepa_037765.p1	upregulated	AT3G61490
Acepa_031267.p1	upregulated	AT1G24540
Acepa_046270.p1	upregulated	-
Acepa_034223.p1	upregulated	AT1G76680
Acepa_015890.p1	upregulated	AT1G09430
Acepa_005294.p1	upregulated	AT1G14290
Acepa_058195.p1	upregulated	AT2G47140
Acepa_034280.p1	upregulated	AT4G13710
Acepa_038119.p1	upregulated	AT2G22250
Acepa_055294.p1	upregulated	AT5G45280
Acepa_045009.p1	upregulated	AT5G43250
Acepa_025860.p1	upregulated	AT1G12240
Acepa_022567.p1	upregulated	AT5G50290
Acepa_033011.p1	upregulated	AT5G61890
Acepa_068470.p1	upregulated	AT1G55210
Acepa_047631.p1	upregulated	AT5G06860
Acepa_037902.p1	upregulated	-
Acepa_042503.p1	upregulated	AT2G37790
Acepa_034343.p1	upregulated	AT3G07990
Acepa_039963.p1	upregulated	AT3G07990
Acepa_028508.p1	upregulated	AT1G08280
Acepa_018544.p1	upregulated	AT2G40330
Acepa_029691.p1	upregulated	AT1G76690
Acepa_029145.p1	upregulated	AT5G05340
Acepa_096746.p1	upregulated	AT5G28010
Acepa_082074.p1	upregulated	AT3G21240
Acepa_035567.p1	upregulated	AT1G76680
Acepa_056073.p1	upregulated	AT5G06860
Acepa_093105.p1	upregulated	AT3G20390
Acepa_036237.p1	upregulated	-
Acepa_015817.p1	upregulated	AT4G12730
Acepa_031117.p1	upregulated	AT4G37810
Acepa_079767.p1	upregulated	AT1G22840
Acepa_069567.p1	upregulated	AT3G46940
Acepa_011468.p1	upregulated	AT5G52060
Acepa_049349.p1	upregulated	AT1G04040
Acepa_041944.p1	upregulated	-
Acepa_011467.p1	upregulated	AT5G52060
Acepa_020707.p3	upregulated	AT2G44160
Acepa_019233.p1	upregulated	AT2G36870
Acepa_023007.p1	upregulated	AT5G06390
Acepa_045707.p1	upregulated	AT5G52570
Acepa_060671.p1	upregulated	AT1G34060
Acepa_035680.p1	upregulated	AT4G20940
Acepa_035241.p1	upregulated	AT3G52990
Acepa_033750.p2	upregulated	AT1G68530
Acepa_035011.p1	upregulated	AT2G40330
Acepa_042305.p1	upregulated	AT4G14960
Acepa_102134.p1	upregulated	AT3G59970
Acepa_071430.p1	upregulated	AT2G23180
Acepa_029990.p1	upregulated	AT5G20970
Acepa_042767.p1	upregulated	AT5G46280
Acepa_052074.p3	upregulated	-
Acepa_083302.p1	upregulated	AT4G25260
Acepa_020677.p1	upregulated	AT5G02750
Acepa_040866.p1	upregulated	AT4G31890
Acepa_037061.p1	upregulated	AT1G74670
Acepa_040229.p2	upregulated	AT1G02205
Acepa_078769.p1	upregulated	AT2G35660
Acepa_083677.p1	upregulated	AT5G48930
Acepa_046350.p1	upregulated	AT2G26640
Acepa_021565.p1	upregulated	AT2G46960
Acepa_023653.p1	upregulated	AT1G24020
Acepa_082751.p1	upregulated	AT1G17020
Acepa_093551.p1	upregulated	AT4G00880
Acepa_047448.p1	upregulated	AT5G60710
Acepa_036160.p1	upregulated	AT1G12240
Acepa_041049.p1	upregulated	AT2G20680
Acepa_035959.p1	upregulated	AT5G20950
Acepa_083120.p1	upregulated	AT1G34060
Acepa_034127.p1	upregulated	AT4G08770
Acepa_095657.p1	upregulated	AT1G14290
Acepa_085073.p2	upregulated	AT1G15170
Acepa_095775.p1	upregulated	AT3G45970
Acepa_059820.p1	upregulated	AT4G28570
Acepa_005788.p1	upregulated	AT4G27435
Acepa_083263.p1	upregulated	AT3G23560
Acepa_023752.p1	upregulated	AT5G62700
Acepa_013744.p1	upregulated	AT1G30570
Acepa_104772.p1	upregulated	AT4G23160
Acepa_040655.p1	upregulated	AT1G21310
Acepa_081170.p1	upregulated	AT3G28580
Acepa_076061.p1	upregulated	AT1G49670
Acepa_035498.p1	upregulated	AT2G26640
Acepa_038015.p1	upregulated	AT5G17920
Acepa_022406.p1	upregulated	AT4G36220
Acepa_016713.p1	upregulated	AT5G05320
Acepa_055137.p1	upregulated	AT5G54160
Acepa_055868.p2	upregulated	AT3G26300
Acepa_032414.p1	upregulated	AT5G46940
Acepa_024335.p1	upregulated	AT2G30620
Acepa_035372.p1	upregulated	AT5G17920
Acepa_097716.p1	upregulated	AT1G03220
Acepa_042522.p1	upregulated	AT3G21240
Acepa_085174.p1	upregulated	AT5G45280
Acepa_041465.p1	upregulated	AT4G34131
Acepa_038271.p1	upregulated	AT1G15950
Acepa_050631.p1	upregulated	AT5G05340
Acepa_077756.p1	upregulated	AT1G53820
Acepa_080250.p1	upregulated	AT5G47870
Acepa_059815.p1	upregulated	AT5G14180
Acepa_074801.p1	upregulated	AT5G20950
Acepa_083785.p1	upregulated	AT1G66920
Acepa_021999.p2	upregulated	AT5G14920
Acepa_021863.p1	upregulated	AT2G15325
Acepa_059605.p1	upregulated	ATMG00810
Acepa_025708.p1	upregulated	AT4G32940
Acepa_082113.p1	upregulated	AT3G13790
Acepa_018023.p1	upregulated	AT3G18180
Acepa_037764.p1	upregulated	AT1G12240
Acepa_040754.p1	upregulated	AT4G14960
Acepa_054218.p1	upregulated	-
Acepa_100906.p1	upregulated	AT4G05020
Acepa_094072.p1	upregulated	AT1G49480
Acepa_069840.p2	upregulated	AT1G11700
Acepa_010509.p1	upregulated	AT5G50850
Acepa_035824.p1	upregulated	AT5G65360
Acepa_032240.p1	upregulated	AT4G39730
Acepa_076975.p1	upregulated	AT4G00430
Acepa_070280.p1	upregulated	AT3G23250
Acepa_098058.p1	upregulated	AT5G06720
Acepa_037643.p1	upregulated	AT5G23940
Acepa_018970.p1	upregulated	AT4G01870
Acepa_023366.p1	upregulated	AT5G47920
Acepa_019223.p1	upregulated	AT5G05340
Acepa_076621.p1	upregulated	AT1G71110
Acepa_035193.p2	upregulated	-
Acepa_016598.p1	upregulated	AT3G17470
Acepa_096407.p1	upregulated	AT4G35160
Acepa_044590.p1	upregulated	AT3G25980
Acepa_039715.p1	upregulated	AT1G24020
Acepa_075723.p1	upregulated	AT2G44940
Acepa_039818.p1	upregulated	AT5G66750
Acepa_070639.p1	upregulated	AT3G04720
Acepa_041649.p1	upregulated	AT2G23180
Acepa_016154.p1	upregulated	AT4G13710
Acepa_010932.p1	upregulated	AT1G22400
Acepa_082722.p1	upregulated	AT4G19390
Acepa_039239.p1	upregulated	AT5G45280
Acepa_009745.p1	upregulated	AT1G62760
Acepa_040212.p1	upregulated	AT5G57800
Acepa_042685.p1	upregulated	AT1G13280
Acepa_036912.p2	upregulated	AT4G28680
Acepa_066361.p1	upregulated	AT1G10550
Acepa_040491.p1	upregulated	AT1G21310
Acepa_020042.p1	upregulated	AT2G01660
Acepa_074560.p1	upregulated	AT5G55050
Acepa_043064.p1	upregulated	AT4G36020
Acepa_067766.p1	upregulated	AT1G18740
Acepa_019232.p1	upregulated	AT2G36870
Acepa_037451.p1	upregulated	AT1G12240
Acepa_052235.p1	upregulated	AT2G40330
Acepa_068291.p1	upregulated	-
Acepa_016382.p1	upregulated	AT1G02850
Acepa_011906.p1	upregulated	-
Acepa_102253.p1	upregulated	AT5G05340
Acepa_047903.p2	upregulated	AT3G23550
Acepa_098157.p1	upregulated	-
Acepa_085070.p1	upregulated	AT1G15170
Acepa_074802.p1	upregulated	AT5G20950
Acepa_067305.p1	upregulated	AT5G22650
Acepa_036580.p1	upregulated	AT3G45140
Acepa_023949.p1	upregulated	AT3G15820
Acepa_011466.p1	upregulated	AT5G62100
Acepa_100746.p1	upregulated	AT5G45280
Acepa_034949.p1	upregulated	AT1G22400
Acepa_055133.p1	upregulated	AT5G54160
Acepa_018821.p1	upregulated	AT1G23460
Acepa_088125.p2	upregulated	AT4G39730
Acepa_037176.p1	upregulated	AT5G65360
Acepa_007134.p1	upregulated	AT5G49460
Acepa_039813.p1	upregulated	AT5G48930
Acepa_036655.p1	upregulated	AT1G12240
Acepa_034521.p1	upregulated	AT3G16850
Acepa_039954.p1	upregulated	AT4G11050
Acepa_006522.p1	upregulated	AT5G02560
Acepa_057200.p1	upregulated	AT1G53820
Acepa_023981.p1	upregulated	AT3G08600
Acepa_034684.p1	upregulated	AT2G30490
Acepa_010444.p1	upregulated	AT2G45470
Acepa_029403.p1	upregulated	AT1G29640
Acepa_030962.p1	upregulated	AT5G17920
Acepa_015330.p1	upregulated	AT1G76160
Acepa_037670.p1	upregulated	AT2G37040
Acepa_071566.p1	upregulated	AT4G28310
Acepa_039676.p1	upregulated	AT3G54400
Acepa_040781.p1	upregulated	AT3G18170
Acepa_022263.p1	upregulated	AT1G61667
Acepa_021584.p1	upregulated	AT4G28250
Acepa_029093.p1	upregulated	AT5G44640
Acepa_042400.p1	upregulated	AT3G23840
Acepa_068859.p1	upregulated	AT3G28345
Acepa_006519.p1	upregulated	AT5G59870
Acepa_073396.p1	upregulated	AT2G41380
Acepa_035081.p1	upregulated	AT3G21770
Acepa_031585.p1	upregulated	AT2G45050
Acepa_014615.p1	upregulated	AT2G16440
Acepa_024823.p1	upregulated	-
Acepa_023947.p2	upregulated	AT3G15820
Acepa_098329.p1	upregulated	AT5G67310
Acepa_026482.p1	upregulated	AT3G52990
Acepa_043146.p2	upregulated	AT1G34060
Acepa_022282.p1	upregulated	AT4G23930
Acepa_068387.p1	upregulated	AT4G39730
Acepa_020697.p1	upregulated	AT2G01820
Acepa_058364.p1	upregulated	AT1G76680
Acepa_014269.p1	upregulated	AT1G12570
Acepa_046832.p1	upregulated	-
Acepa_036384.p1	upregulated	AT4G37320
Acepa_025863.p1	upregulated	AT1G12240
Acepa_023010.p1	upregulated	AT4G37340
Acepa_016021.p1	upregulated	AT1G10550
Acepa_040846.p1	upregulated	AT5G17920
Acepa_067617.p1	upregulated	AT1G43160
Acepa_033829.p1	upregulated	AT1G76680
Acepa_068481.p1	upregulated	AT2G18969
Acepa_042470.p2	upregulated	AT1G12240
Acepa_069764.p1	upregulated	AT4G25830
Acepa_008941.p1	upregulated	AT1G11545
Acepa_032435.p1	upregulated	AT5G20060
Acepa_090269.p1	upregulated	AT5G46940
Acepa_040439.p1	upregulated	AT1G12240
Acepa_041308.p1	upregulated	AT1G10070
Acepa_009892.p1	upregulated	AT5G13870
Acepa_067888.p1	upregulated	AT1G32540
Acepa_072607.p1	upregulated	AT4G17030
Acepa_042369.p1	upregulated	AT5G11880
Acepa_016862.p1	upregulated	AT5G65360
Acepa_040971.p1	upregulated	AT2G25770
Acepa_078715.p1	upregulated	AT1G09390
Acepa_041499.p1	upregulated	AT5G44635
Acepa_104622.p1	upregulated	AT1G65790
Acepa_024187.p1	upregulated	AT1G75710
Acepa_074228.p1	upregulated	-
Acepa_036662.p1	upregulated	AT1G34040
Acepa_004827.p1	upregulated	AT5G24330
Acepa_024766.p1	upregulated	AT1G62660
Acepa_001350.p1	upregulated	-
Acepa_074386.p1	upregulated	AT1G49640
Acepa_070470.p1	upregulated	AT1G06550
Acepa_029033.p1	upregulated	AT3G51000
Acepa_041097.p1	upregulated	AT4G39330
Acepa_081789.p2	upregulated	-
Acepa_040109.p1	upregulated	AT4G39330
Acepa_044984.p1	upregulated	AT2G40435
Acepa_037239.p4	upregulated	AT4G13710
Acepa_018603.p1	upregulated	AT1G32100
Acepa_041060.p1	upregulated	AT1G62660
Acepa_012575.p1	upregulated	AT4G00360
Acepa_009077.p1	upregulated	AT2G25770
Acepa_009948.p1	upregulated	AT2G39700
Acepa_026018.p1	upregulated	AT4G17970
Acepa_013660.p1	upregulated	AT1G22330
Acepa_012131.p1	upregulated	AT1G34040
Acepa_034262.p1	upregulated	AT1G44900
Acepa_042710.p1	upregulated	AT1G08010
Acepa_095838.p1	upregulated	AT4G25810
Acepa_035820.p3	upregulated	AT1G21310
Acepa_037270.p1	upregulated	AT2G38110
Acepa_075802.p1	upregulated	AT5G06860
Acepa_025855.p1	upregulated	AT3G25780
Acepa_015016.p1	upregulated	AT5G06860
Acepa_039603.p1	upregulated	AT4G13940
Acepa_034626.p3	upregulated	AT4G02330
Acepa_010062.p1	upregulated	AT5G15740
Acepa_078014.p1	upregulated	AT2G16760
Acepa_073643.p1	upregulated	AT5G64570
Acepa_052399.p1	upregulated	AT5G63160
Acepa_080512.p1	upregulated	AT5G47450
Acepa_012344.p1	upregulated	AT3G14390
Acepa_044552.p1	upregulated	AT3G47570
Acepa_007042.p1	upregulated	AT1G14390
Acepa_010240.p1	upregulated	AT5G65360
Acepa_053492.p1	upregulated	-
Acepa_038399.p1	upregulated	-
Acepa_079587.p1	upregulated	AT3G27640
Acepa_034936.p1	upregulated	AT5G07990
Acepa_014483.p1	upregulated	AT4G11290
Acepa_040512.p2	upregulated	AT5G17920
Acepa_047793.p1	upregulated	AT4G13510
Acepa_011751.p1	upregulated	AT3G06880
Acepa_100907.p1	upregulated	AT4G05020
Acepa_017633.p1	upregulated	AT3G02230
Acepa_035239.p1	upregulated	AT5G08020
Acepa_086085.p1	upregulated	AT5G54970
Acepa_031376.p1	upregulated	-
Acepa_068770.p1	upregulated	AT2G41480
Acepa_103929.p1	upregulated	-
Acepa_097269.p1	upregulated	AT5G59870
Acepa_020751.p1	upregulated	AT1G68470
Acepa_053090.p1	upregulated	AT2G20340
Acepa_016391.p1	upregulated	AT1G32170
Acepa_010724.p1	upregulated	AT1G02500
Acepa_019770.p1	upregulated	AT1G79720
Acepa_037362.p1	upregulated	AT2G38080
Acepa_078307.p1	upregulated	AT4G19120
Acepa_028222.p1	upregulated	AT3G13790
Acepa_030987.p1	upregulated	AT1G09320
Acepa_026182.p1	upregulated	AT2G15780
Acepa_070578.p2	upregulated	AT1G32100
Acepa_011615.p1	upregulated	AT5G06860
Acepa_021585.p2	upregulated	-
Acepa_019503.p1	upregulated	AT1G62440
Acepa_068769.p1	upregulated	AT2G41480
Acepa_019058.p1	upregulated	AT1G01050
Acepa_015609.p1	upregulated	AT3G22142
Acepa_009044.p1	upregulated	AT2G44300
Acepa_085163.p1	upregulated	AT5G67020
Acepa_000818.p1	upregulated	AT1G02205
Acepa_010471.p1	upregulated	AT3G27060
Acepa_095270.p1	upregulated	AT1G68530
Acepa_010346.p1	upregulated	-
Acepa_107880.p1	upregulated	AT3G02820
Acepa_066119.p1	upregulated	-
Acepa_036285.p1	upregulated	AT4G35160
Acepa_039055.p1	upregulated	AT4G35630
Acepa_067378.p1	upregulated	AT5G13330
Acepa_015329.p1	upregulated	AT1G76160
Acepa_037894.p2	upregulated	AT1G49670
Acepa_050787.p1	upregulated	AT2G29570
Acepa_096323.p2	upregulated	-
Acepa_011097.p1	upregulated	AT5G17920
Acepa_014956.p1	upregulated	AT5G67400
Acepa_034233.p1	upregulated	AT2G28490
Acepa_015985.p1	upregulated	AT4G39330
Acepa_101553.p1	upregulated	AT4G07960
Acepa_078650.p1	upregulated	AT1G68750
Acepa_022886.p1	upregulated	AT2G24490
Acepa_040524.p1	upregulated	AT1G76680
Acepa_102252.p1	upregulated	AT5G05340
Acepa_047375.p1	upregulated	AT4G28100
Acepa_028013.p1	upregulated	AT3G60270
Acepa_029598.p1	upregulated	AT5G45280
Acepa_009871.p1	upregulated	AT4G06744
Acepa_029149.p1	upregulated	AT2G32990
Acepa_040799.p1	upregulated	AT5G06390
Acepa_045793.p1	upregulated	AT1G75750
Acepa_034111.p1	upregulated	AT1G70370
Acepa_080112.p1	upregulated	AT5G09220
Acepa_079799.p1	upregulated	AT2G20340
Acepa_068496.p1	upregulated	AT2G28100
Acepa_017478.p1	upregulated	AT5G48930
Acepa_009133.p1	upregulated	AT4G39490
Acepa_031646.p1	upregulated	AT4G11600
Acepa_025062.p1	upregulated	AT4G39830
Acepa_039316.p1	upregulated	AT5G54160
Acepa_036600.p1	upregulated	AT2G17230
Acepa_002359.p1	upregulated	AT1G26100
Acepa_096603.p1	upregulated	AT1G32100
Acepa_102805.p1	upregulated	AT3G28580
Acepa_096115.p1	upregulated	AT3G61490
Acepa_053627.p4	upregulated	AT4G37340
Acepa_060689.p1	upregulated	AT1G69790
Acepa_065463.p1	upregulated	AT3G02885
Acepa_025858.p1	upregulated	AT1G12240
Acepa_028487.p1	upregulated	AT4G12730
Acepa_010818.p1	upregulated	AT1G10650
Acepa_096322.p2	upregulated	-
Acepa_042553.p1	upregulated	AT1G11580
Acepa_071067.p1	upregulated	AT4G38660
Acepa_025620.p1	upregulated	AT3G54710
Acepa_038820.p3	upregulated	-
Acepa_096797.p1	upregulated	AT3G54320
Acepa_054300.p1	upregulated	AT4G32940
Acepa_035605.p1	upregulated	AT5G44640
Acepa_038507.p1	upregulated	AT1G76680
Acepa_029524.p1	upregulated	AT2G35120
Acepa_065899.p1	upregulated	AT2G46490
Acepa_027843.p1	upregulated	AT5G06860
Acepa_081169.p1	upregulated	AT3G28580
Acepa_042646.p1	upregulated	AT4G13940
Acepa_021862.p1	upregulated	AT2G15325
Acepa_042117.p1	upregulated	AT3G21240
Acepa_025166.p1	upregulated	AT5G08020
Acepa_018602.p1	upregulated	AT1G32100
Acepa_010489.p1	upregulated	AT5G03300
Acepa_027403.p1	upregulated	AT5G04370
Acepa_046091.p1	upregulated	AT1G32450
Acepa_039610.p1	upregulated	AT2G37040
Acepa_091051.p1	upregulated	AT3G54940
Acepa_036362.p1	upregulated	-
Acepa_041543.p2	upregulated	-
Acepa_098102.p1	upregulated	AT5G42170
Acepa_022483.p1	upregulated	AT4G14960
Acepa_074489.p1	upregulated	AT3G59220
Acepa_010562.p1	upregulated	AT4G11050
Acepa_017045.p1	upregulated	AT4G15800
Acepa_028907.p1	upregulated	AT3G55120
Acepa_023812.p1	upregulated	AT2G33330
Acepa_039869.p3	upregulated	AT1G21310
Acepa_014217.p1	upregulated	AT5G08640
Acepa_045622.p1	upregulated	AT4G16260
Acepa_005650.p1	upregulated	AT5G50200
Acepa_028244.p1	upregulated	AT1G51090
Acepa_027262.p1	upregulated	AT2G30870
Acepa_039920.p1	upregulated	AT4G36360
Acepa_037710.p1	upregulated	AT1G49670
Acepa_072351.p1	upregulated	AT4G01700
Acepa_070640.p1	upregulated	AT3G04720
Acepa_023991.p1	upregulated	AT5G06860
Acepa_019607.p1	upregulated	AT1G74030
Acepa_101343.p1	upregulated	AT3G20390
Acepa_066768.p2	upregulated	AT5G55730
Acepa_018036.p1	upregulated	AT4G20170
Acepa_074409.p1	upregulated	-
Acepa_072878.p1	upregulated	AT5G24580
Acepa_066241.p1	upregulated	AT1G51090
Acepa_037085.p1	upregulated	AT2G47160
Acepa_048888.p1	upregulated	AT2G41380
Acepa_076056.p1	upregulated	AT2G25770
Acepa_023160.p1	upregulated	AT3G53190
Acepa_047391.p1	upregulated	AT5G13930
Acepa_011459.p1	upregulated	AT1G70370
Acepa_034215.p1	upregulated	AT1G34060
Acepa_071347.p1	upregulated	AT5G02230
Acepa_044338.p1	upregulated	AT3G20390
Acepa_028151.p1	upregulated	AT4G27830
Acepa_075948.p1	upregulated	AT5G65810
Acepa_103385.p1	upregulated	AT4G23160
Acepa_081108.p1	upregulated	AT5G28010
Acepa_084533.p1	upregulated	AT2G45510
Acepa_029694.p1	upregulated	AT1G76690
Acepa_015130.p1	upregulated	AT2G45300
Acepa_009890.p1	upregulated	AT5G13870
Acepa_052393.p1	upregulated	AT3G48360
Acepa_030996.p1	upregulated	AT1G70280
Acepa_023532.p1	upregulated	AT4G35160
Acepa_076836.p1	upregulated	AT1G10370
Acepa_029028.p1	upregulated	AT4G11290
Acepa_028820.p1	upregulated	AT5G55730
Acepa_019236.p1	upregulated	AT1G27680
Acepa_012934.p1	upregulated	AT2G30490
Acepa_018191.p1	upregulated	AT4G39840
Acepa_011597.p1	upregulated	AT3G07320
Acepa_044353.p2	upregulated	AT5G05365
Acepa_048607.p2	upregulated	AT2G18180
Acepa_005530.p1	upregulated	AT1G06620
Acepa_049249.p1	upregulated	AT5G63390
Acepa_043239.p1	upregulated	AT5G12380
Acepa_022596.p1	upregulated	AT1G19900
Acepa_004998.p1	upregulated	AT2G39870
Acepa_006367.p1	upregulated	AT1G58360
Acepa_025707.p1	upregulated	AT2G25940
Acepa_066993.p1	upregulated	AT1G16905
Acepa_015669.p1	upregulated	AT2G18969
Acepa_079473.p1	upregulated	AT2G38290
Acepa_023478.p1	upregulated	AT4G37850
Acepa_035890.p1	upregulated	AT4G19020
Acepa_103747.p1	upregulated	AT1G58360
Acepa_018334.p1	upregulated	AT4G39330
Acepa_030499.p1	upregulated	AT2G22880
Acepa_022738.p1	upregulated	AT3G12700
Acepa_053394.p1	upregulated	AT2G01150
Acepa_043100.p1	upregulated	AT5G54160
Acepa_079483.p1	upregulated	AT4G30420
Acepa_009748.p1	upregulated	AT4G25260
Acepa_045526.p1	upregulated	AT1G09540
Acepa_012876.p1	upregulated	AT1G25510
Acepa_067890.p1	upregulated	AT2G15760
Acepa_020248.p1	upregulated	AT3G20390
Acepa_094587.p1	upregulated	AT5G67550
Acepa_073663.p1	upregulated	AT1G44100
Acepa_080282.p1	upregulated	AT2G36780
Acepa_041657.p1	upregulated	AT5G60020
Acepa_096159.p1	upregulated	AT5G10310
Acepa_083670.p1	upregulated	AT5G48930
Acepa_101331.p1	upregulated	AT4G14350
Acepa_037639.p1	upregulated	AT4G11050
Acepa_040310.p1	upregulated	-
Acepa_026809.p1	upregulated	AT3G26310
Acepa_015331.p2	upregulated	AT1G76160
Acepa_099545.p1	upregulated	AT4G16260
Acepa_066460.p1	upregulated	AT1G67730
Acepa_027842.p1	upregulated	AT5G06860
Acepa_095045.p1	upregulated	AT4G25830
Acepa_037487.p1	upregulated	AT1G24540
Acepa_041913.p1	upregulated	AT1G34060
Acepa_020653.p1	upregulated	AT3G30180
Acepa_027402.p1	upregulated	AT5G04370
Acepa_018059.p1	upregulated	AT3G23820
Acepa_014214.p1	upregulated	AT5G08640
Acepa_028775.p1	upregulated	AT5G66580
Acepa_079043.p1	upregulated	AT5G06860
Acepa_085162.p1	upregulated	AT3G45970
Acepa_038808.p1	upregulated	AT3G12500
Acepa_047105.p1	upregulated	AT1G80160
Acepa_038083.p1	upregulated	AT2G46960
Acepa_059802.p1	upregulated	AT5G60900
Acepa_077760.p1	upregulated	AT1G53820
Acepa_036835.p1	upregulated	AT2G04160
Acepa_098103.p1	upregulated	AT1G29660
Acepa_019111.p1	upregulated	-
Acepa_058241.p1	upregulated	AT4G14305
Acepa_071417.p1	upregulated	AT2G26640
Acepa_026145.p2	upregulated	AT1G01490
Acepa_045896.p1	upregulated	AT5G67550
Acepa_018640.p1	upregulated	AT3G59140
Acepa_011657.p1	upregulated	AT4G37080
Acepa_078465.p1	upregulated	AT1G58420
Acepa_035733.p1	upregulated	AT5G45280
Acepa_103486.p1	upregulated	AT2G27920
Acepa_038174.p2	upregulated	AT1G76680
Acepa_036025.p1	upregulated	AT3G49220
Acepa_032291.p2	upregulated	-
Acepa_101296.p1	downregulated	-
Acepa_018889.p1	downregulated	AT3G16360
Acepa_045919.p1	downregulated	-
Acepa_061091.p1	downregulated	-
Acepa_102568.p1	downregulated	AT2G25770
Acepa_107844.p1	downregulated	AT1G76650
Acepa_078239.p1	downregulated	AT1G62660
Acepa_016583.p1	downregulated	AT1G13080
Acepa_022290.p1	downregulated	AT1G01320
Acepa_051872.p1	downregulated	AT1G02640
Acepa_010678.p1	downregulated	AT3G13750
Acepa_033912.p1	downregulated	AT5G63800
Acepa_011641.p1	downregulated	AT5G03860
Acepa_011643.p1	downregulated	AT5G03860
Acepa_013294.p1	downregulated	-
Acepa_076034.p1	downregulated	AT3G11180
Acepa_100864.p1	downregulated	AT3G16360
Acepa_035215.p1	downregulated	AT5G63800
Acepa_034723.p1	downregulated	AT4G03510
Acepa_056773.p1	downregulated	AT5G46050
Acepa_100812.p1	downregulated	AT2G41250
Acepa_102812.p1	downregulated	AT5G56550
Acepa_033858.p1	downregulated	AT5G46050
Acepa_076926.p2	downregulated	AT1G80110
Acepa_096511.p1	downregulated	AT2G42620
Acepa_025877.p1	downregulated	AT3G24255
Acepa_015093.p1	downregulated	AT3G17940
Acepa_072985.p1	downregulated	AT5G22090
Acepa_080565.p1	downregulated	AT1G12240
Acepa_014079.p2	downregulated	AT2G15890
Acepa_102215.p1	downregulated	AT5G13630
Acepa_070472.p1	downregulated	AT1G56600
Acepa_009700.p1	downregulated	AT5G44680
Acepa_056502.p1	downregulated	AT5G50920
Acepa_097918.p1	downregulated	AT1G65390
Acepa_042378.p1	downregulated	AT4G33010
Acepa_018890.p1	downregulated	AT3G16360
Acepa_075702.p2	downregulated	AT5G49360
Acepa_020798.p1	downregulated	-
Acepa_104535.p1	downregulated	AT4G28080
Acepa_011644.p1	downregulated	AT5G03860
Acepa_009037.p2	downregulated	AT1G62660
Acepa_100650.p1	downregulated	-
Acepa_015951.p1	downregulated	AT1G12240
Acepa_035880.p1	downregulated	AT3G13750
Acepa_009698.p1	downregulated	AT5G44680
Acepa_102279.p1	downregulated	AT1G03090
Acepa_022817.p1	downregulated	AT1G30820
Acepa_031126.p1	downregulated	AT4G21970
Acepa_100627.p1	downregulated	-
Acepa_024151.p1	downregulated	AT4G19850
Acepa_011384.p1	downregulated	AT4G27450
Acepa_074946.p1	downregulated	AT3G51895
Acepa_009104.p1	downregulated	AT5G49730
Acepa_079988.p1	downregulated	AT2G39130
Acepa_049012.p2	downregulated	AT5G02020
Acepa_041721.p1	downregulated	AT5G63800
Acepa_019838.p1	downregulated	AT1G02640
Acepa_055883.p1	downregulated	AT5G24490
Acepa_033050.p1	downregulated	-
Acepa_021066.p1	downregulated	AT3G16360
Acepa_085297.p1	downregulated	AT4G35160
Acepa_011383.p1	downregulated	AT3G15450
Acepa_078234.p1	downregulated	AT1G62660
Acepa_009229.p1	downregulated	AT5G50920
Acepa_077579.p1	downregulated	-
Acepa_008810.p1	downregulated	AT5G10930
Acepa_009701.p1	downregulated	AT5G44680
Acepa_075204.p1	downregulated	AT5G64530
Acepa_009310.p1	downregulated	AT1G19530
Acepa_036931.p2	downregulated	-
Acepa_035158.p1	downregulated	AT3G51895
Acepa_011824.p1	downregulated	AT5G04885
Acepa_010676.p1	downregulated	AT3G13750
Acepa_085290.p1	downregulated	AT4G35160
Acepa_102315.p1	downregulated	AT5G63800
Acepa_085991.p1	downregulated	AT5G49740
Acepa_011826.p1	downregulated	AT5G20950
Acepa_040006.p4	downregulated	-
Acepa_028604.p1	downregulated	AT4G19170
Acepa_015094.p1	downregulated	AT3G17940
Acepa_104475.p1	downregulated	AT5G49740
Acepa_028407.p1	downregulated	AT2G39130
Acepa_022159.p1	downregulated	AT4G38470
Acepa_046456.p1	downregulated	AT2G16050
Acepa_061092.p1	downregulated	-
Acepa_051873.p2	downregulated	AT1G02640
Acepa_045399.p1	downregulated	AT5G66440
Acepa_011827.p1	downregulated	AT5G20950
Acepa_032566.p1	downregulated	AT5G04560
Acepa_097915.p1	downregulated	AT1G65390
Acepa_018891.p1	downregulated	AT3G16360
Acepa_100385.p1	downregulated	AT4G33010
Acepa_027006.p1	downregulated	AT3G16720
Acepa_061180.p1	downregulated	AT4G35160
Acepa_041130.p1	downregulated	AT5G46050
Acepa_050617.p1	downregulated	AT5G58770
Acepa_032020.p1	downregulated	-
Acepa_023298.p1	downregulated	AT2G23180
Acepa_061182.p1	downregulated	AT4G35160
Acepa_100626.p1	downregulated	-

## Sheet: Asia-23 0 hpi vs 32 hpi
Gene ID	DE results	TAIR ID			GO annotatied transcripts
Acepa_100419.p1	upregulated	AT2G25770			Response to stress	Response to biotic stimulus
Acepa_021432.p1	upregulated	AT5G05340		Upregulated transcripts	66	23
Acepa_027380.p1	upregulated	AT3G12170		Downregulated transcripts	11	2
Acepa_024647.p1	upregulated	AT2G22880
Acepa_000089.p1	upregulated	AT4G28310
Acepa_018543.p1	upregulated	AT2G40330
Acepa_080208.p1	upregulated	-
Acepa_042555.p1	upregulated	AT1G67630
Acepa_103602.p1	upregulated	AT3G19000
Acepa_071545.p1	upregulated	AT3G15680
Acepa_019058.p1	upregulated	AT1G01050
Acepa_045996.p1	upregulated	AT5G43860
Acepa_032882.p1	upregulated	AT2G32300
Acepa_031254.p1	upregulated	AT1G14290
Acepa_038053.p1	upregulated	AT2G40550
Acepa_017917.p3	upregulated	AT1G67590
Acepa_070646.p1	upregulated	AT1G12110
Acepa_094818.p1	upregulated	AT5G61160
Acepa_048973.p1	upregulated	AT1G54970
Acepa_092793.p2	upregulated	AT5G01740
Acepa_055868.p2	upregulated	AT3G26300
Acepa_024033.p1	upregulated	AT1G76240
Acepa_041753.p1	upregulated	AT5G41880
Acepa_015947.p1	upregulated	AT3G22600
Acepa_009148.p2	upregulated	AT2G29550
Acepa_042014.p1	upregulated	AT5G37260
Acepa_036817.p1	upregulated	AT1G34040
Acepa_047904.p1	upregulated	AT3G23560
Acepa_074928.p2	upregulated	AT1G10070
Acepa_012126.p1	upregulated	AT3G12145
Acepa_034088.p1	upregulated	AT4G39490
Acepa_011986.p1	upregulated	AT3G05740
Acepa_020246.p1	upregulated	AT3G20390
Acepa_035838.p1	upregulated	AT1G68530
Acepa_077792.p1	upregulated	AT4G11290
Acepa_035566.p1	upregulated	AT1G67320
Acepa_016188.p1	upregulated	-
Acepa_042180.p1	upregulated	AT2G47160
Acepa_081618.p1	upregulated	AT2G47140
Acepa_042485.p1	upregulated	AT5G49810
Acepa_056072.p1	upregulated	AT5G06860
Acepa_040959.p1	upregulated	AT4G39830
Acepa_077136.p1	upregulated	-
Acepa_058196.p1	upregulated	AT2G47140
Acepa_014745.p1	upregulated	-
Acepa_044338.p1	upregulated	AT3G20390
Acepa_012619.p1	upregulated	AT5G03760
Acepa_020248.p1	upregulated	AT3G20390
Acepa_014615.p1	upregulated	AT2G16440
Acepa_029912.p1	upregulated	AT5G62220
Acepa_041691.p1	upregulated	AT2G20340
Acepa_012617.p1	upregulated	AT5G03760
Acepa_014448.p1	upregulated	AT1G08250
Acepa_031571.p1	upregulated	AT3G45140
Acepa_041732.p1	upregulated	AT5G11880
Acepa_053092.p1	upregulated	AT2G20340
Acepa_051728.p1	upregulated	AT5G65780
Acepa_072204.p1	upregulated	AT3G23250
Acepa_034888.p1	upregulated	AT5G23660
Acepa_025178.p1	upregulated	AT5G50200
Acepa_019391.p1	upregulated	AT3G23740
Acepa_039496.p2	upregulated	AT1G21310
Acepa_017918.p1	upregulated	AT1G67590
Acepa_104773.p1	upregulated	AT4G23160
Acepa_037350.p1	upregulated	AT5G13750
Acepa_027844.p1	upregulated	AT5G06860
Acepa_035460.p3	upregulated	AT1G23200
Acepa_095360.p1	upregulated	-
Acepa_095656.p1	upregulated	AT1G14290
Acepa_069186.p1	upregulated	AT1G08880
Acepa_035197.p1	upregulated	AT4G39490
Acepa_044021.p1	upregulated	AT2G27470
Acepa_071727.p1	upregulated	AT5G06720
Acepa_084802.p1	upregulated	AT4G13930
Acepa_020867.p1	upregulated	AT4G20520
Acepa_039519.p1	upregulated	AT5G23420
Acepa_028393.p1	upregulated	-
Acepa_072195.p1	upregulated	AT2G47460
Acepa_023533.p1	upregulated	AT4G35160
Acepa_035459.p1	upregulated	AT1G62660
Acepa_035295.p1	upregulated	AT3G19910
Acepa_021750.p1	upregulated	AT1G09310
Acepa_038166.p2	upregulated	AT3G50660
Acepa_024138.p1	upregulated	AT2G46630
Acepa_036954.p1	upregulated	AT3G42170
Acepa_009890.p1	upregulated	AT5G13870
Acepa_046379.p1	upregulated	AT2G41760
Acepa_034223.p1	upregulated	AT1G76680
Acepa_048584.p1	upregulated	AT5G41920
Acepa_058195.p1	upregulated	AT2G47140
Acepa_009892.p1	upregulated	AT5G13870
Acepa_022567.p1	upregulated	AT5G50290
Acepa_037902.p1	upregulated	-
Acepa_038083.p1	upregulated	AT2G46960
Acepa_036526.p1	upregulated	AT5G20950
Acepa_018544.p1	upregulated	AT2G40330
Acepa_029145.p1	upregulated	AT5G05340
Acepa_056237.p1	upregulated	AT2G34630
Acepa_096746.p1	upregulated	AT5G28010
Acepa_093105.p1	upregulated	AT3G20390
Acepa_036237.p1	upregulated	-
Acepa_049349.p1	upregulated	AT1G04040
Acepa_041944.p1	upregulated	-
Acepa_019233.p1	upregulated	AT2G36870
Acepa_060671.p1	upregulated	AT1G34060
Acepa_104772.p1	upregulated	AT4G23160
Acepa_026809.p1	upregulated	AT3G26310
Acepa_042767.p1	upregulated	AT5G46280
Acepa_029805.p1	upregulated	AT4G13540
Acepa_037061.p1	upregulated	AT1G74670
Acepa_078769.p1	upregulated	AT2G35660
Acepa_034477.p1	upregulated	AT4G19020
Acepa_021565.p1	upregulated	AT2G46960
Acepa_036160.p1	upregulated	AT1G12240
Acepa_035959.p1	upregulated	AT5G20950
Acepa_034127.p1	upregulated	AT4G08770
Acepa_039239.p1	upregulated	AT5G45280
Acepa_085073.p2	upregulated	AT1G15170
Acepa_081170.p1	upregulated	AT3G28580
Acepa_076061.p1	upregulated	AT1G49670
Acepa_016713.p1	upregulated	AT5G05320
Acepa_049184.p1	upregulated	-
Acepa_023823.p1	upregulated	-
Acepa_096908.p1	upregulated	AT4G13080
Acepa_041465.p1	upregulated	AT4G34131
Acepa_050631.p1	upregulated	AT5G05340
Acepa_074801.p1	upregulated	AT5G20950
Acepa_037466.p1	upregulated	AT5G37260
Acepa_082113.p1	upregulated	AT3G13790
Acepa_037764.p1	upregulated	AT1G12240
Acepa_100906.p1	upregulated	AT4G05020
Acepa_101472.p1	upregulated	AT1G75990
Acepa_032240.p1	upregulated	AT4G39730
Acepa_076975.p1	upregulated	AT4G00430
Acepa_098058.p1	upregulated	AT5G06720
Acepa_018970.p1	upregulated	AT4G01870
Acepa_019223.p1	upregulated	AT5G05340
Acepa_037894.p2	upregulated	AT1G49670
Acepa_035193.p2	upregulated	-
Acepa_096407.p1	upregulated	AT4G35160
Acepa_030875.p1	upregulated	AT3G15680
Acepa_039715.p1	upregulated	AT1G24020
Acepa_039818.p1	upregulated	AT5G66750
Acepa_070639.p1	upregulated	AT3G04720
Acepa_041649.p1	upregulated	AT2G23180
Acepa_040212.p1	upregulated	AT5G57800
Acepa_019503.p1	upregulated	AT1G62440
Acepa_040491.p1	upregulated	AT1G21310
Acepa_020042.p1	upregulated	AT2G01660
Acepa_045793.p1	upregulated	AT1G75750
Acepa_037451.p1	upregulated	AT1G12240
Acepa_036185.p1	upregulated	AT3G24255
Acepa_011906.p1	upregulated	-
Acepa_055246.p1	upregulated	AT1G34040
Acepa_074409.p1	upregulated	-
Acepa_093156.p1	upregulated	AT5G66400
Acepa_074802.p1	upregulated	AT5G20950
Acepa_052393.p1	upregulated	AT3G48360
Acepa_023532.p1	upregulated	AT4G35160
Acepa_036580.p1	upregulated	AT3G45140
Acepa_044353.p2	upregulated	AT5G05365
Acepa_023949.p1	upregulated	AT3G15820
Acepa_034949.p1	upregulated	AT1G22400
Acepa_049249.p1	upregulated	AT5G63390
Acepa_032881.p1	upregulated	AT3G24255
Acepa_088125.p2	upregulated	AT4G39730
Acepa_037176.p1	upregulated	AT5G65360
Acepa_056931.p1	upregulated	AT5G56530
Acepa_039813.p1	upregulated	AT5G48930
Acepa_006522.p1	upregulated	AT5G02560
Acepa_057200.p1	upregulated	AT1G53820
Acepa_072953.p1	upregulated	-
Acepa_040655.p1	upregulated	AT1G21310
Acepa_071566.p1	upregulated	AT4G28310
Acepa_039676.p1	upregulated	AT3G54400
Acepa_040781.p1	upregulated	AT3G18170
Acepa_081286.p1	upregulated	AT1G19180
Acepa_040511.p1	upregulated	AT4G35160
Acepa_022088.p2	upregulated	AT3G24255
Acepa_023947.p2	upregulated	AT3G15820
Acepa_098329.p1	upregulated	AT5G67310
Acepa_043146.p2	upregulated	AT1G34060
Acepa_020697.p1	upregulated	AT2G01820
Acepa_027843.p1	upregulated	AT5G06860
Acepa_103747.p1	upregulated	AT1G58360
Acepa_025863.p1	upregulated	AT1G12240
Acepa_042503.p1	upregulated	AT2G37790
Acepa_016021.p1	upregulated	AT1G10550
Acepa_068481.p1	upregulated	AT2G18969
Acepa_069764.p1	upregulated	AT4G25830
Acepa_032435.p1	upregulated	AT5G20060
Acepa_053094.p2	upregulated	AT1G22370
Acepa_040439.p1	upregulated	AT1G12240
Acepa_041308.p1	upregulated	AT1G10070
Acepa_067888.p1	upregulated	AT1G32540
Acepa_042369.p1	upregulated	AT5G11880
Acepa_016862.p1	upregulated	AT5G65360
Acepa_040971.p1	upregulated	AT2G25770
Acepa_051477.p1	upregulated	AT1G78380
Acepa_078715.p1	upregulated	AT1G09390
Acepa_041499.p1	upregulated	AT5G44635
Acepa_074228.p1	upregulated	-
Acepa_036662.p1	upregulated	AT1G34040
Acepa_004827.p1	upregulated	AT5G24330
Acepa_024766.p1	upregulated	AT1G62660
Acepa_041097.p1	upregulated	AT4G39330
Acepa_081789.p2	upregulated	-
Acepa_001165.p1	upregulated	-
Acepa_041060.p1	upregulated	AT1G62660
Acepa_009077.p1	upregulated	AT2G25770
Acepa_034262.p1	upregulated	AT1G44900
Acepa_080477.p1	upregulated	-
Acepa_095838.p1	upregulated	AT4G25810
Acepa_035820.p3	upregulated	AT1G21310
Acepa_037270.p1	upregulated	AT2G38110
Acepa_075802.p1	upregulated	AT5G06860
Acepa_082648.p1	upregulated	-
Acepa_010932.p1	upregulated	AT1G22400
Acepa_053492.p1	upregulated	-
Acepa_104421.p1	upregulated	AT3G45140
Acepa_076673.p1	upregulated	AT3G21950
Acepa_050221.p1	upregulated	-
Acepa_014483.p1	upregulated	AT4G11290
Acepa_047793.p1	upregulated	AT4G13510
Acepa_100907.p1	upregulated	AT4G05020
Acepa_035239.p1	upregulated	AT5G08020
Acepa_086085.p1	upregulated	AT5G54970
Acepa_068770.p1	upregulated	AT2G41480
Acepa_103929.p1	upregulated	-
Acepa_097269.p1	upregulated	AT5G59870
Acepa_016391.p1	upregulated	AT1G32170
Acepa_099600.p1	upregulated	-
Acepa_026182.p1	upregulated	AT2G15780
Acepa_070578.p2	upregulated	AT1G32100
Acepa_066361.p1	upregulated	AT1G10550
Acepa_015609.p1	upregulated	AT3G22142
Acepa_033185.p1	upregulated	AT4G21020
Acepa_027404.p1	upregulated	AT1G19640
Acepa_036285.p1	upregulated	AT4G35160
Acepa_067378.p1	upregulated	AT5G13330
Acepa_083263.p1	upregulated	AT3G23560
Acepa_078650.p1	upregulated	AT1G68750
Acepa_022886.p1	upregulated	AT2G24490
Acepa_029149.p1	upregulated	AT2G32990
Acepa_080112.p1	upregulated	AT5G09220
Acepa_096797.p1	upregulated	AT3G54320
Acepa_012344.p1	upregulated	AT3G14390
Acepa_025062.p1	upregulated	AT4G39830
Acepa_039316.p1	upregulated	AT5G54160
Acepa_096603.p1	upregulated	AT1G32100
Acepa_102805.p1	upregulated	AT3G28580
Acepa_025858.p1	upregulated	AT1G12240
Acepa_065899.p1	upregulated	AT2G46490
Acepa_025620.p1	upregulated	AT3G54710
Acepa_038820.p3	upregulated	-
Acepa_009133.p1	upregulated	AT4G39490
Acepa_059802.p1	upregulated	AT5G60900
Acepa_069442.p1	upregulated	AT1G21280
Acepa_069567.p1	upregulated	AT3G46940
Acepa_081169.p1	upregulated	AT3G28580
Acepa_025166.p1	upregulated	AT5G08020
Acepa_046091.p1	upregulated	AT1G32450
Acepa_039610.p1	upregulated	AT2G37040
Acepa_091051.p1	upregulated	AT3G54940
Acepa_035501.p1	upregulated	AT1G47710
Acepa_041543.p2	upregulated	-
Acepa_098102.p1	upregulated	AT5G42170
Acepa_035890.p1	upregulated	AT4G19020
Acepa_039869.p3	upregulated	AT1G21310
Acepa_014217.p1	upregulated	AT5G08640
Acepa_070640.p1	upregulated	AT3G04720
Acepa_101343.p1	upregulated	AT3G20390
Acepa_018036.p1	upregulated	AT4G20170
Acepa_023007.p1	upregulated	AT5G06390
Acepa_047903.p2	upregulated	AT3G23550
Acepa_037085.p1	upregulated	AT2G47160
Acepa_085070.p1	upregulated	AT1G15170
Acepa_047391.p1	upregulated	AT5G13930
Acepa_000770.p1	upregulated	AT4G23160
Acepa_071347.p1	upregulated	AT5G02230
Acepa_081108.p1	upregulated	AT5G28010
Acepa_076184.p1	upregulated	AT2G25770
Acepa_039941.p1	upregulated	-
Acepa_041630.p1	upregulated	AT5G20950
Acepa_019236.p1	upregulated	AT1G27680
Acepa_072287.p2	upregulated	AT3G49470
Acepa_011597.p1	upregulated	AT3G07320
Acepa_043239.p1	upregulated	AT5G12380
Acepa_039963.p1	upregulated	AT3G07990
Acepa_037634.p1	upregulated	AT2G46960
Acepa_034684.p1	upregulated	AT2G30490
Acepa_011324.p1	upregulated	-
Acepa_053608.p1	upregulated	AT1G68750
Acepa_030499.p1	upregulated	AT2G22880
Acepa_027403.p1	upregulated	AT5G04370
Acepa_079483.p1	upregulated	AT4G30420
Acepa_018598.p1	upregulated	AT5G65940
Acepa_018388.p1	upregulated	AT4G23160
Acepa_010240.p1	upregulated	AT5G65360
Acepa_080282.p1	upregulated	AT2G36780
Acepa_067617.p1	upregulated	AT1G43160
Acepa_083670.p1	upregulated	AT5G48930
Acepa_040310.p1	upregulated	-
Acepa_033031.p2	upregulated	-
Acepa_020558.p1	upregulated	AT3G51590
Acepa_073396.p1	upregulated	AT2G41380
Acepa_027842.p1	upregulated	AT5G06860
Acepa_071430.p1	upregulated	AT2G23180
Acepa_041913.p1	upregulated	AT1G34060
Acepa_014214.p1	upregulated	AT5G08640
Acepa_079043.p1	upregulated	AT5G06860
Acepa_036655.p1	upregulated	AT1G12240
Acepa_047105.p1	upregulated	AT1G80160
Acepa_025860.p1	upregulated	AT1G12240
Acepa_026145.p2	upregulated	AT1G01490
Acepa_042470.p2	upregulated	AT1G12240
Acepa_078465.p1	upregulated	AT1G58420
Acepa_101296.p1	downregulated	-
Acepa_078330.p1	downregulated	AT3G13750
Acepa_049012.p2	downregulated	AT5G02020
Acepa_011641.p1	downregulated	AT5G03860
Acepa_011643.p1	downregulated	AT5G03860
Acepa_025398.p1	downregulated	AT5G22090
Acepa_016124.p2	downregulated	AT5G07470
Acepa_059263.p1	downregulated	AT5G06560
Acepa_035880.p1	downregulated	AT3G13750
Acepa_044206.p1	downregulated	AT3G07350
Acepa_025397.p1	downregulated	AT5G22090
Acepa_102215.p1	downregulated	AT5G13630
Acepa_009700.p1	downregulated	AT5G44680
Acepa_075702.p2	downregulated	AT5G49360
Acepa_016125.p1	downregulated	AT5G07470
Acepa_100650.p1	downregulated	-
Acepa_009701.p1	downregulated	AT5G44680
Acepa_037716.p1	downregulated	AT5G02810
Acepa_009698.p1	downregulated	AT5G44680
Acepa_035995.p1	downregulated	AT1G22770
Acepa_095753.p1	downregulated	AT5G64170
Acepa_011384.p1	downregulated	AT4G27450
Acepa_059265.p1	downregulated	AT5G06580
Acepa_042749.p1	downregulated	AT2G20180
Acepa_010676.p1	downregulated	AT3G13750
Acepa_011383.p1	downregulated	AT3G15450
Acepa_070256.p1	downregulated	AT2G20180
Acepa_070258.p1	downregulated	AT2G20180
Acepa_036877.p1	downregulated	AT5G02810
Acepa_009310.p1	downregulated	AT1G19530
Acepa_049490.p1	downregulated	AT2G46790
Acepa_011644.p1	downregulated	AT5G03860
Acepa_022159.p1	downregulated	AT4G38470
Acepa_070257.p1	downregulated	AT2G20180
Acepa_041186.p1	downregulated	AT5G02810
Acepa_010678.p1	downregulated	AT3G13750
Acepa_050617.p1	downregulated	AT5G58770

## Sheet: Asia-24 0 hpi vs 4 hpi
Gene ID	DE results	TAIR ID			GO annotatied transcripts
Acepa_022839.p1	upregulated	AT5G60460			Response to stress	Response to biotic stimulus
Acepa_039132.p1	upregulated	AT1G55020		Upregulated transcripts	122	64
Acepa_020507.p1	upregulated	AT3G59970		Downregulated transcripts	29	12
Acepa_012138.p1	upregulated	AT3G02430
Acepa_097305.p1	upregulated	AT2G32530
Acepa_028247.p1	upregulated	AT1G49670
Acepa_011661.p1	upregulated	AT5G02070
Acepa_016961.p1	upregulated	AT3G21690
Acepa_047563.p1	upregulated	AT2G18340
Acepa_017490.p2	upregulated	AT4G35160
Acepa_100030.p1	upregulated	AT4G28365
Acepa_028702.p1	upregulated	AT2G17120
Acepa_022533.p1	upregulated	AT1G20190
Acepa_086553.p1	upregulated	-
Acepa_054038.p1	upregulated	AT1G13680
Acepa_017110.p1	upregulated	AT1G62790
Acepa_024647.p1	upregulated	AT2G22880
Acepa_018543.p1	upregulated	AT2G40330
Acepa_026160.p1	upregulated	AT2G17070
Acepa_103602.p1	upregulated	AT3G19000
Acepa_084092.p1	upregulated	AT1G79560
Acepa_072610.p1	upregulated	AT1G56430
Acepa_030962.p1	upregulated	AT5G17920
Acepa_051998.p1	upregulated	AT2G01050
Acepa_032882.p1	upregulated	AT2G32300
Acepa_021069.p1	upregulated	AT1G23340
Acepa_031254.p1	upregulated	AT1G14290
Acepa_031392.p1	upregulated	AT2G37430
Acepa_040417.p1	upregulated	AT4G20520
Acepa_016262.p1	upregulated	AT5G67150
Acepa_099683.p1	upregulated	AT2G46960
Acepa_083122.p1	upregulated	AT1G34060
Acepa_036605.p1	upregulated	AT3G12580
Acepa_000182.p1	upregulated	AT3G45140
Acepa_094818.p1	upregulated	AT5G61160
Acepa_011591.p1	upregulated	AT5G15490
Acepa_047072.p1	upregulated	-
Acepa_010486.p1	upregulated	AT5G03300
Acepa_048973.p1	upregulated	AT1G54970
Acepa_047387.p1	upregulated	AT5G40370
Acepa_019163.p1	upregulated	AT5G02290
Acepa_035231.p1	upregulated	AT2G32530
Acepa_060215.p2	upregulated	-
Acepa_092793.p2	upregulated	AT5G01740
Acepa_023652.p1	upregulated	-
Acepa_081111.p1	upregulated	AT2G40330
Acepa_072744.p1	upregulated	AT1G76570
Acepa_040066.p1	upregulated	AT2G42320
Acepa_059302.p1	upregulated	-
Acepa_104339.p1	upregulated	AT1G34060
Acepa_029313.p1	upregulated	AT3G16150
Acepa_015947.p1	upregulated	AT3G22600
Acepa_097139.p1	upregulated	AT1G68280
Acepa_045682.p1	upregulated	AT2G15490
Acepa_092467.p1	upregulated	AT1G67730
Acepa_045318.p1	upregulated	AT3G49720
Acepa_029093.p1	upregulated	AT5G44640
Acepa_079567.p1	upregulated	AT2G27660
Acepa_047904.p1	upregulated	AT3G23560
Acepa_074928.p2	upregulated	AT1G10070
Acepa_012126.p1	upregulated	AT3G12145
Acepa_034088.p1	upregulated	AT4G39490
Acepa_077747.p1	upregulated	AT1G67070
Acepa_053750.p1	upregulated	-
Acepa_087182.p1	upregulated	AT5G19040
Acepa_070664.p1	upregulated	AT1G05370
Acepa_070293.p1	upregulated	AT3G63540
Acepa_079479.p1	upregulated	-
Acepa_009523.p1	upregulated	-
Acepa_025448.p1	upregulated	AT3G10080
Acepa_050757.p1	upregulated	AT3G54040
Acepa_043078.p1	upregulated	AT1G55020
Acepa_050797.p1	upregulated	AT5G19440
Acepa_042658.p1	upregulated	AT1G12570
Acepa_094752.p1	upregulated	AT5G39210
Acepa_043043.p1	upregulated	AT2G26640
Acepa_019666.p1	upregulated	AT1G11740
Acepa_036439.p1	upregulated	AT2G39130
Acepa_035838.p1	upregulated	AT1G68530
Acepa_077792.p1	upregulated	AT4G11290
Acepa_023379.p3	upregulated	-
Acepa_024033.p1	upregulated	AT1G76240
Acepa_032176.p1	upregulated	AT1G05010
Acepa_081618.p1	upregulated	AT2G47140
Acepa_018210.p1	upregulated	-
Acepa_022180.p1	upregulated	-
Acepa_057147.p1	upregulated	AT3G48890
Acepa_006393.p1	upregulated	AT1G76690
Acepa_010488.p1	upregulated	AT5G03300
Acepa_056072.p1	upregulated	AT5G06860
Acepa_019162.p1	upregulated	AT4G35600
Acepa_077641.p1	upregulated	AT1G80160
Acepa_047418.p1	upregulated	AT1G24360
Acepa_030319.p2	upregulated	-
Acepa_058196.p1	upregulated	AT2G47140
Acepa_014217.p1	upregulated	AT5G08640
Acepa_072089.p1	upregulated	AT2G02980
Acepa_105649.p1	upregulated	AT5G44210
Acepa_100849.p1	upregulated	AT5G03300
Acepa_049348.p1	upregulated	AT1G04040
Acepa_061163.p1	upregulated	AT5G50700
Acepa_094070.p1	upregulated	AT3G19630
Acepa_058182.p1	upregulated	AT1G75540
Acepa_016893.p1	upregulated	AT1G24360
Acepa_083686.p1	upregulated	AT5G03300
Acepa_059950.p1	upregulated	AT3G16150
Acepa_057387.p1	upregulated	AT1G75780
Acepa_032923.p1	upregulated	AT5G36910
Acepa_041691.p1	upregulated	AT2G20340
Acepa_033750.p2	upregulated	AT1G68530
Acepa_017251.p1	upregulated	AT2G38360
Acepa_102052.p1	upregulated	AT2G20340
Acepa_095656.p1	upregulated	AT1G14290
Acepa_031571.p1	upregulated	AT3G45140
Acepa_041732.p1	upregulated	AT5G11880
Acepa_013354.p1	upregulated	AT1G23200
Acepa_053092.p1	upregulated	AT2G20340
Acepa_051728.p1	upregulated	AT5G65780
Acepa_104418.p1	upregulated	AT3G45140
Acepa_072204.p1	upregulated	AT3G23250
Acepa_012380.p1	upregulated	AT2G01050
Acepa_029350.p1	upregulated	AT3G60870
Acepa_100029.p1	upregulated	AT4G28365
Acepa_025178.p1	upregulated	AT5G50200
Acepa_082646.p1	upregulated	-
Acepa_019058.p1	upregulated	AT1G01050
Acepa_071347.p1	upregulated	AT5G02230
Acepa_068193.p1	upregulated	AT5G01740
Acepa_039496.p2	upregulated	AT1G21310
Acepa_022405.p1	upregulated	AT4G36220
Acepa_039118.p1	upregulated	AT5G64410
Acepa_051296.p1	upregulated	AT5G61210
Acepa_027844.p1	upregulated	AT5G06860
Acepa_035460.p3	upregulated	AT1G23200
Acepa_051999.p1	upregulated	-
Acepa_028703.p1	upregulated	AT2G17120
Acepa_014448.p1	upregulated	AT1G08250
Acepa_035554.p1	upregulated	AT2G04780
Acepa_035197.p1	upregulated	AT4G39490
Acepa_049108.p1	upregulated	-
Acepa_029742.p1	upregulated	AT1G56600
Acepa_031663.p1	upregulated	AT2G39980
Acepa_019709.p1	upregulated	AT3G54170
Acepa_016713.p1	upregulated	AT5G05320
Acepa_076561.p1	upregulated	AT1G19180
Acepa_065927.p1	upregulated	AT2G31670
Acepa_050849.p1	upregulated	AT5G55050
Acepa_028222.p1	upregulated	AT3G13790
Acepa_075468.p1	upregulated	AT1G02400
Acepa_050406.p1	upregulated	AT3G47570
Acepa_077623.p1	upregulated	AT2G35980
Acepa_035459.p1	upregulated	AT1G62660
Acepa_092483.p1	upregulated	AT2G32300
Acepa_021821.p1	upregulated	-
Acepa_097961.p1	upregulated	-
Acepa_100286.p1	upregulated	AT2G31390
Acepa_038241.p1	upregulated	AT1G55020
Acepa_017736.p1	upregulated	AT2G46960
Acepa_020651.p1	upregulated	AT3G30180
Acepa_105854.p1	upregulated	AT3G06035
Acepa_042122.p1	upregulated	AT2G22250
Acepa_010484.p1	upregulated	AT5G03300
Acepa_036954.p1	upregulated	AT3G42170
Acepa_031267.p1	upregulated	AT1G24540
Acepa_056005.p1	upregulated	-
Acepa_035726.p1	upregulated	AT5G38970
Acepa_034223.p1	upregulated	AT1G76680
Acepa_005294.p1	upregulated	AT1G14290
Acepa_058195.p1	upregulated	AT2G47140
Acepa_077621.p1	upregulated	AT2G35980
Acepa_034643.p1	upregulated	AT1G22360
Acepa_014662.p1	upregulated	AT4G02800
Acepa_023644.p2	upregulated	-
Acepa_094069.p1	upregulated	AT3G19630
Acepa_015533.p1	upregulated	-
Acepa_022197.p1	upregulated	AT1G08080
Acepa_035195.p2	upregulated	AT3G11080
Acepa_022735.p1	upregulated	AT1G49740
Acepa_036973.p1	upregulated	AT4G32300
Acepa_047631.p1	upregulated	AT5G06860
Acepa_080246.p1	upregulated	AT5G47870
Acepa_037902.p1	upregulated	-
Acepa_038083.p1	upregulated	AT2G46960
Acepa_037094.p1	upregulated	ATMG01250
Acepa_018544.p1	upregulated	AT2G40330
Acepa_029691.p1	upregulated	AT1G76690
Acepa_070052.p1	upregulated	AT5G01320
Acepa_029145.p1	upregulated	AT5G05340
Acepa_085260.p1	upregulated	AT3G24500
Acepa_096746.p1	upregulated	AT5G28010
Acepa_054043.p1	upregulated	AT1G13680
Acepa_035567.p1	upregulated	AT1G76680
Acepa_056073.p1	upregulated	AT5G06860
Acepa_022199.p1	upregulated	AT2G28210
Acepa_085163.p1	upregulated	AT5G67020
Acepa_033831.p1	upregulated	AT4G37330
Acepa_060214.p1	upregulated	-
Acepa_021905.p1	upregulated	AT5G48050
Acepa_048396.p1	upregulated	AT5G48290
Acepa_019780.p1	upregulated	-
Acepa_070788.p1	upregulated	AT1G48880
Acepa_016569.p1	upregulated	AT2G44500
Acepa_046497.p1	upregulated	AT5G63450
Acepa_098102.p1	upregulated	AT5G42170
Acepa_015130.p1	upregulated	AT2G45300
Acepa_032073.p2	upregulated	AT1G24620
Acepa_035241.p1	upregulated	AT3G52990
Acepa_077841.p1	upregulated	-
Acepa_035011.p1	upregulated	AT2G40330
Acepa_066460.p1	upregulated	AT1G67730
Acepa_102134.p1	upregulated	AT3G59970
Acepa_043022.p1	upregulated	AT1G65840
Acepa_055961.p1	upregulated	AT1G76810
Acepa_099017.p1	upregulated	AT1G14870
Acepa_039873.p1	upregulated	AT3G12580
Acepa_032301.p1	upregulated	AT5G50260
Acepa_040229.p2	upregulated	AT1G02205
Acepa_078769.p1	upregulated	AT2G35660
Acepa_048901.p1	upregulated	AT5G08170
Acepa_050804.p1	upregulated	AT5G19440
Acepa_021565.p1	upregulated	AT2G46960
Acepa_041966.p1	upregulated	AT1G50410
Acepa_020595.p1	upregulated	AT4G13710
Acepa_083120.p1	upregulated	AT1G34060
Acepa_034127.p1	upregulated	AT4G08770
Acepa_065899.p1	upregulated	AT2G46490
Acepa_037223.p1	upregulated	AT1G02205
Acepa_039239.p1	upregulated	AT5G45280
Acepa_006626.p1	upregulated	AT2G22795
Acepa_039031.p2	upregulated	AT3G54700
Acepa_032435.p1	upregulated	AT5G20060
Acepa_024321.p1	upregulated	ATMG01250
Acepa_100887.p1	upregulated	AT1G51210
Acepa_051052.p1	upregulated	AT1G22460
Acepa_076061.p1	upregulated	AT1G49670
Acepa_035498.p1	upregulated	AT2G26640
Acepa_038015.p1	upregulated	AT5G17920
Acepa_097327.p1	upregulated	AT3G25250
Acepa_001065.p1	upregulated	AT3G21690
Acepa_055137.p1	upregulated	AT5G54160
Acepa_055868.p2	upregulated	AT3G26300
Acepa_032414.p1	upregulated	AT5G46940
Acepa_023123.p1	upregulated	-
Acepa_053577.p1	upregulated	AT5G04370
Acepa_035372.p1	upregulated	AT5G17920
Acepa_097716.p1	upregulated	AT1G03220
Acepa_005530.p1	upregulated	AT1G06620
Acepa_048982.p1	upregulated	AT5G47230
Acepa_027404.p1	upregulated	AT1G19640
Acepa_038271.p1	upregulated	AT1G15950
Acepa_050631.p1	upregulated	AT5G05340
Acepa_033078.p1	upregulated	-
Acepa_037601.p1	upregulated	AT5G02500
Acepa_000201.p1	upregulated	AT3G54950
Acepa_035057.p1	upregulated	AT2G23180
Acepa_006884.p1	upregulated	AT1G08080
Acepa_042132.p1	upregulated	AT1G55020
Acepa_021863.p1	upregulated	AT2G15325
Acepa_059605.p1	upregulated	ATMG00810
Acepa_036882.p1	upregulated	AT1G22380
Acepa_095657.p1	upregulated	AT1G14290
Acepa_037764.p1	upregulated	AT1G12240
Acepa_068524.p1	upregulated	AT1G64980
Acepa_076761.p3	upregulated	AT3G15470
Acepa_100906.p1	upregulated	AT4G05020
Acepa_076450.p1	upregulated	AT3G05500
Acepa_012674.p1	upregulated	AT1G54730
Acepa_070280.p1	upregulated	AT3G23250
Acepa_098058.p1	upregulated	AT5G06720
Acepa_090451.p1	upregulated	-
Acepa_005015.p1	upregulated	AT1G14360
Acepa_039700.p1	upregulated	AT1G32450
Acepa_023594.p1	upregulated	AT1G76650
Acepa_014569.p1	upregulated	AT3G56200
Acepa_029203.p1	upregulated	AT3G29670
Acepa_025794.p1	upregulated	AT3G02580
Acepa_054773.p1	upregulated	AT5G48050
Acepa_016598.p1	upregulated	AT3G17470
Acepa_044121.p1	upregulated	AT3G25900
Acepa_092028.p1	upregulated	AT2G39980
Acepa_081178.p1	upregulated	AT5G50200
Acepa_100920.p1	upregulated	AT1G33540
Acepa_019614.p1	upregulated	AT1G72970
Acepa_070639.p1	upregulated	AT3G04720
Acepa_076382.p1	upregulated	-
Acepa_040971.p1	upregulated	AT2G25770
Acepa_042792.p1	upregulated	AT5G51460
Acepa_032727.p1	upregulated	-
Acepa_036374.p1	upregulated	AT3G24255
Acepa_032867.p1	upregulated	AT5G15100
Acepa_007924.p1	upregulated	AT2G05940
Acepa_053090.p1	upregulated	AT2G20340
Acepa_042685.p1	upregulated	AT1G13280
Acepa_036912.p2	upregulated	AT4G28680
Acepa_066361.p1	upregulated	AT1G10550
Acepa_040491.p1	upregulated	AT1G21310
Acepa_100727.p1	upregulated	AT1G14290
Acepa_006695.p1	upregulated	AT3G49720
Acepa_020653.p1	upregulated	AT3G30180
Acepa_069547.p1	upregulated	AT1G04760
Acepa_045207.p1	upregulated	-
Acepa_074560.p1	upregulated	AT5G55050
Acepa_030812.p1	upregulated	-
Acepa_043064.p1	upregulated	AT4G36020
Acepa_045793.p1	upregulated	AT1G75750
Acepa_037451.p1	upregulated	AT1G12240
Acepa_041325.p1	upregulated	AT4G20520
Acepa_017735.p1	upregulated	AT2G46960
Acepa_029316.p1	upregulated	AT3G16150
Acepa_011906.p1	upregulated	-
Acepa_031059.p1	upregulated	AT3G14420
Acepa_100907.p1	upregulated	AT4G05020
Acepa_049713.p1	upregulated	AT2G01300
Acepa_074409.p1	upregulated	-
Acepa_095144.p1	upregulated	AT5G51890
Acepa_009078.p1	upregulated	AT5G28840
Acepa_027280.p1	upregulated	AT5G13330
Acepa_069661.p1	upregulated	-
Acepa_027774.p1	upregulated	AT1G56670
Acepa_038386.p1	upregulated	AT5G02500
Acepa_034949.p1	upregulated	AT1G22400
Acepa_032881.p1	upregulated	AT3G24255
Acepa_018970.p1	upregulated	AT4G01870
Acepa_008860.p1	upregulated	AT5G10770
Acepa_050754.p2	upregulated	-
Acepa_012497.p1	upregulated	AT1G56430
Acepa_056931.p1	upregulated	AT5G56530
Acepa_039813.p1	upregulated	AT5G48930
Acepa_036655.p1	upregulated	AT1G12240
Acepa_070028.p1	upregulated	AT5G01470
Acepa_080656.p1	upregulated	AT3G22850
Acepa_034029.p1	upregulated	AT1G44350
Acepa_040098.p1	upregulated	AT3G12580
Acepa_040281.p1	upregulated	-
Acepa_057200.p1	upregulated	AT1G53820
Acepa_034684.p1	upregulated	AT2G30490
Acepa_029403.p1	upregulated	AT1G29640
Acepa_028666.p1	upregulated	-
Acepa_078687.p1	upregulated	-
Acepa_031484.p1	upregulated	AT1G70780
Acepa_057965.p1	upregulated	-
Acepa_040655.p1	upregulated	AT1G21310
Acepa_037670.p1	upregulated	AT2G37040
Acepa_030500.p1	upregulated	AT2G22880
Acepa_037388.p1	upregulated	AT4G37320
Acepa_040781.p1	upregulated	AT3G18170
Acepa_039372.p1	upregulated	AT5G56350
Acepa_077910.p1	upregulated	AT1G76160
Acepa_062370.p1	upregulated	AT4G33230
Acepa_081286.p1	upregulated	AT1G19180
Acepa_022406.p1	upregulated	AT4G36220
Acepa_041095.p1	upregulated	AT1G60220
Acepa_073858.p1	upregulated	AT1G44350
Acepa_033011.p1	upregulated	AT5G61890
Acepa_019161.p1	upregulated	AT5G02290
Acepa_026482.p1	upregulated	AT3G52990
Acepa_058364.p1	upregulated	AT1G76680
Acepa_014269.p1	upregulated	AT1G12570
Acepa_018511.p1	upregulated	AT5G18880
Acepa_037176.p1	upregulated	AT5G65360
Acepa_076304.p1	upregulated	-
Acepa_008817.p1	upregulated	AT1G55020
Acepa_039217.p1	upregulated	AT3G16520
Acepa_078151.p1	upregulated	AT3G24660
Acepa_042503.p1	upregulated	AT2G37790
Acepa_030071.p1	upregulated	AT2G29420
Acepa_016021.p1	upregulated	AT1G10550
Acepa_054963.p1	upregulated	-
Acepa_033829.p1	upregulated	AT1G76680
Acepa_077838.p1	upregulated	AT3G47570
Acepa_069764.p1	upregulated	AT4G25830
Acepa_045692.p1	upregulated	AT1G64980
Acepa_026287.p1	upregulated	-
Acepa_070988.p1	upregulated	AT2G43120
Acepa_007251.p1	upregulated	AT1G23480
Acepa_040439.p1	upregulated	AT1G12240
Acepa_049543.p1	upregulated	AT4G13080
Acepa_007253.p1	upregulated	AT5G03760
Acepa_041308.p1	upregulated	AT1G10070
Acepa_037727.p1	upregulated	AT3G21690
Acepa_028705.p1	upregulated	AT2G17120
Acepa_060064.p1	upregulated	AT5G47020
Acepa_042369.p1	upregulated	AT5G11880
Acepa_073630.p1	upregulated	AT1G10820
Acepa_008818.p1	upregulated	AT1G55020
Acepa_018770.p2	upregulated	-
Acepa_074228.p1	upregulated	-
Acepa_029315.p1	upregulated	AT3G16150
Acepa_024766.p1	upregulated	AT1G62660
Acepa_035894.p2	upregulated	-
Acepa_005003.p1	upregulated	AT2G22760
Acepa_028704.p1	upregulated	AT2G17120
Acepa_074386.p1	upregulated	AT1G49640
Acepa_040846.p1	upregulated	AT5G17920
Acepa_076557.p1	upregulated	AT1G19180
Acepa_074243.p1	upregulated	-
Acepa_050021.p1	upregulated	AT1G65610
Acepa_103448.p1	upregulated	AT1G63430
Acepa_041097.p1	upregulated	AT4G39330
Acepa_041284.p1	upregulated	AT1G77330
Acepa_009357.p1	upregulated	-
Acepa_032866.p1	upregulated	AT5G15100
Acepa_041060.p1	upregulated	AT1G62660
Acepa_011925.p1	upregulated	AT4G14960
Acepa_009077.p1	upregulated	AT2G25770
Acepa_079798.p1	upregulated	-
Acepa_021159.p1	upregulated	AT2G28590
Acepa_018415.p1	upregulated	AT5G06870
Acepa_041692.p1	upregulated	AT4G32870
Acepa_012131.p1	upregulated	AT1G34040
Acepa_067608.p1	upregulated	-
Acepa_065590.p2	upregulated	AT5G40690
Acepa_042710.p1	upregulated	AT1G08010
Acepa_095838.p1	upregulated	AT4G25810
Acepa_037519.p1	upregulated	AT4G21700
Acepa_057019.p1	upregulated	AT1G49670
Acepa_037270.p1	upregulated	AT2G38110
Acepa_075802.p1	upregulated	AT5G06860
Acepa_032354.p1	upregulated	-
Acepa_034626.p3	upregulated	AT4G02330
Acepa_075710.p1	upregulated	AT5G43650
Acepa_005651.p1	upregulated	AT4G24715
Acepa_025326.p2	upregulated	AT5G20820
Acepa_053394.p1	upregulated	AT2G01150
Acepa_101257.p1	upregulated	AT1G65840
Acepa_102599.p1	upregulated	-
Acepa_033098.p1	upregulated	AT4G20520
Acepa_052399.p1	upregulated	AT5G63160
Acepa_039603.p1	upregulated	AT4G13940
Acepa_017834.p1	upregulated	AT1G56580
Acepa_031646.p1	upregulated	AT4G11600
Acepa_100564.p1	upregulated	AT5G02290
Acepa_045614.p1	upregulated	AT2G27510
Acepa_007042.p1	upregulated	AT1G14390
Acepa_039316.p1	upregulated	AT5G54160
Acepa_053492.p1	upregulated	-
Acepa_098352.p1	upregulated	AT1G79620
Acepa_104421.p1	upregulated	AT3G45140
Acepa_033897.p1	upregulated	AT5G02500
Acepa_051996.p1	upregulated	-
Acepa_053632.p1	upregulated	AT1G66540
Acepa_104013.p1	upregulated	AT1G68290
Acepa_014483.p1	upregulated	AT4G11290
Acepa_095423.p1	upregulated	AT4G25260
Acepa_040512.p2	upregulated	AT5G17920
Acepa_047793.p1	upregulated	AT4G13510
Acepa_032291.p2	upregulated	-
Acepa_092877.p1	upregulated	AT3G46640
Acepa_046350.p1	upregulated	AT2G26640
Acepa_097910.p2	upregulated	AT4G02800
Acepa_031376.p1	upregulated	-
Acepa_083496.p1	upregulated	AT1G42700
Acepa_103929.p1	upregulated	-
Acepa_040827.p1	upregulated	AT1G15150
Acepa_083670.p1	upregulated	AT5G48930
Acepa_016391.p1	upregulated	AT1G32170
Acepa_015125.p1	upregulated	AT1G14590
Acepa_093711.p1	upregulated	AT1G08230
Acepa_010724.p1	upregulated	AT1G02500
Acepa_101483.p1	upregulated	-
Acepa_079797.p2	upregulated	-
Acepa_040310.p1	upregulated	-
Acepa_042906.p1	upregulated	AT5G45280
Acepa_099600.p1	upregulated	-
Acepa_026182.p1	upregulated	AT2G15780
Acepa_070578.p2	upregulated	AT1G32100
Acepa_029786.p1	upregulated	AT1G17840
Acepa_011615.p1	upregulated	AT5G06860
Acepa_019503.p1	upregulated	AT1G62440
Acepa_068769.p1	upregulated	AT2G41480
Acepa_016962.p1	upregulated	AT3G21690
Acepa_015609.p1	upregulated	AT3G22142
Acepa_058861.p1	upregulated	AT4G27500
Acepa_000818.p1	upregulated	AT1G02205
Acepa_021862.p1	upregulated	AT2G15325
Acepa_067452.p1	upregulated	AT1G68570
Acepa_097408.p1	upregulated	AT3G13510
Acepa_054714.p1	upregulated	AT1G14290
Acepa_066119.p1	upregulated	-
Acepa_093668.p1	upregulated	AT5G64410
Acepa_036989.p1	upregulated	AT4G30210
Acepa_039055.p1	upregulated	AT4G35630
Acepa_067378.p1	upregulated	AT5G13330
Acepa_007629.p1	upregulated	-
Acepa_102141.p1	upregulated	AT2G45130
Acepa_011097.p1	upregulated	AT5G17920
Acepa_075997.p1	upregulated	AT5G06060
Acepa_095421.p1	upregulated	AT3G54040
Acepa_082311.p1	upregulated	AT5G64950
Acepa_006638.p1	upregulated	AT1G67070
Acepa_015985.p1	upregulated	AT4G39330
Acepa_048398.p1	upregulated	AT5G48290
Acepa_098223.p1	upregulated	AT1G48120
Acepa_040524.p1	upregulated	AT1G76680
Acepa_006883.p1	upregulated	AT1G08080
Acepa_102252.p1	upregulated	AT5G05340
Acepa_010503.p1	upregulated	AT1G61290
Acepa_042086.p1	upregulated	AT1G14290
Acepa_025133.p1	upregulated	AT4G23160
Acepa_029598.p1	upregulated	AT5G45280
Acepa_013110.p1	upregulated	AT4G30590
Acepa_025855.p1	upregulated	AT3G25780
Acepa_037539.p2	upregulated	ATMG01250
Acepa_068770.p1	upregulated	AT2G41480
Acepa_097387.p1	upregulated	AT2G32300
Acepa_079799.p1	upregulated	AT2G20340
Acepa_021158.p1	upregulated	AT2G45750
Acepa_017478.p1	upregulated	AT5G48930
Acepa_009133.p1	upregulated	AT4G39490
Acepa_012344.p1	upregulated	AT3G14390
Acepa_025062.p1	upregulated	AT4G39830
Acepa_036600.p1	upregulated	AT2G17230
Acepa_095045.p1	upregulated	AT4G25830
Acepa_030019.p1	upregulated	-
Acepa_096603.p1	upregulated	AT1G32100
Acepa_102805.p1	upregulated	AT3G28580
Acepa_060689.p1	upregulated	AT1G69790
Acepa_010528.p1	upregulated	AT4G37360
Acepa_080250.p1	upregulated	AT5G47870
Acepa_101401.p1	upregulated	AT2G32300
Acepa_106623.p1	upregulated	-
Acepa_016055.p1	upregulated	AT5G53420
Acepa_052476.p1	upregulated	-
Acepa_076396.p1	upregulated	AT4G23160
Acepa_011532.p1	upregulated	AT5G39080
Acepa_096797.p1	upregulated	AT3G54320
Acepa_101477.p1	upregulated	AT1G35250
Acepa_038507.p1	upregulated	AT1G76680
Acepa_069442.p1	upregulated	AT1G21280
Acepa_027843.p1	upregulated	AT5G06860
Acepa_094754.p1	upregulated	AT5G39210
Acepa_042646.p1	upregulated	AT4G13940
Acepa_005243.p1	upregulated	AT1G44760
Acepa_033033.p2	upregulated	ATMG01250
Acepa_010489.p1	upregulated	AT5G03300
Acepa_096747.p2	upregulated	-
Acepa_026920.p1	upregulated	AT1G42990
Acepa_023160.p1	upregulated	AT3G53190
Acepa_077952.p1	upregulated	AT1G53000
Acepa_049349.p1	upregulated	AT1G04040
Acepa_091051.p1	upregulated	AT3G54940
Acepa_038350.p1	upregulated	AT2G01050
Acepa_041543.p2	upregulated	-
Acepa_020707.p3	upregulated	AT2G44160
Acepa_074489.p1	upregulated	AT3G59220
Acepa_014661.p1	upregulated	AT4G02800
Acepa_017045.p1	upregulated	AT4G15800
Acepa_068557.p1	upregulated	AT3G06890
Acepa_040669.p1	upregulated	AT4G26200
Acepa_064744.p2	upregulated	-
Acepa_039942.p1	upregulated	AT1G55020
Acepa_047105.p1	upregulated	AT1G80160
Acepa_013622.p1	upregulated	AT1G65840
Acepa_083211.p1	upregulated	AT5G10770
Acepa_029692.p1	upregulated	AT1G76680
Acepa_101911.p1	upregulated	AT4G24520
Acepa_085246.p1	upregulated	-
Acepa_039143.p1	upregulated	AT4G20520
Acepa_074227.p1	upregulated	-
Acepa_070640.p1	upregulated	AT3G04720
Acepa_017421.p1	upregulated	AT1G68290
Acepa_024882.p1	upregulated	AT4G33470
Acepa_033203.p1	upregulated	AT5G07480
Acepa_035193.p2	upregulated	-
Acepa_027403.p1	upregulated	AT5G04370
Acepa_023007.p1	upregulated	AT5G06390
Acepa_035778.p1	upregulated	AT2G32530
Acepa_076056.p1	upregulated	AT2G25770
Acepa_099663.p1	upregulated	AT3G21865
Acepa_046091.p1	upregulated	AT1G32450
Acepa_023752.p1	upregulated	AT5G62700
Acepa_073247.p1	upregulated	-
Acepa_015386.p1	upregulated	AT1G78240
Acepa_039610.p1	upregulated	AT2G37040
Acepa_059450.p1	upregulated	-
Acepa_039596.p1	upregulated	AT1G55020
Acepa_029033.p1	upregulated	AT3G51000
Acepa_046954.p1	upregulated	-
Acepa_103385.p1	upregulated	AT4G23160
Acepa_023533.p1	upregulated	AT4G35160
Acepa_052395.p1	upregulated	-
Acepa_081108.p1	upregulated	AT5G28010
Acepa_016963.p1	upregulated	AT3G21690
Acepa_029694.p1	upregulated	AT1G76690
Acepa_054376.p1	upregulated	AT4G34660
Acepa_052393.p1	upregulated	AT3G48360
Acepa_055294.p1	upregulated	AT5G45280
Acepa_023532.p1	upregulated	AT4G35160
Acepa_008859.p1	upregulated	AT5G10770
Acepa_029028.p1	upregulated	AT4G11290
Acepa_023010.p1	upregulated	AT4G37340
Acepa_042313.p1	upregulated	AT1G55020
Acepa_101258.p1	upregulated	AT1G65840
Acepa_036580.p1	upregulated	AT3G45140
Acepa_012934.p1	upregulated	AT2G30490
Acepa_018191.p1	upregulated	AT4G39840
Acepa_011597.p1	upregulated	AT3G07320
Acepa_097943.p1	upregulated	-
Acepa_038119.p1	upregulated	AT2G22250
Acepa_031482.p1	upregulated	AT2G32300
Acepa_022682.p1	upregulated	-
Acepa_034440.p1	upregulated	AT5G57110
Acepa_040591.p1	upregulated	AT1G55020
Acepa_046390.p1	upregulated	AT1G48590
Acepa_043239.p1	upregulated	AT5G12380
Acepa_010697.p2	upregulated	-
Acepa_094602.p1	upregulated	AT3G06240
Acepa_103036.p1	upregulated	AT3G02100
Acepa_037634.p1	upregulated	AT2G46960
Acepa_030867.p1	upregulated	AT5G12020
Acepa_066993.p1	upregulated	AT1G16905
Acepa_014058.p1	upregulated	AT1G19840
Acepa_102253.p1	upregulated	AT5G05340
Acepa_044353.p2	upregulated	AT5G05365
Acepa_026164.p1	upregulated	AT5G25265
Acepa_079473.p1	upregulated	AT2G38290
Acepa_072724.p2	upregulated	-
Acepa_023478.p1	upregulated	AT4G37850
Acepa_034089.p1	upregulated	AT4G32300
Acepa_039439.p1	upregulated	-
Acepa_030499.p1	upregulated	AT2G22880
Acepa_106973.p1	upregulated	AT5G14980
Acepa_037350.p1	upregulated	AT5G13750
Acepa_047903.p2	upregulated	AT3G23550
Acepa_080249.p1	upregulated	AT5G47870
Acepa_036139.p1	upregulated	AT2G32300
Acepa_037163.p1	upregulated	AT1G55020
Acepa_029586.p2	upregulated	AT4G35650
Acepa_026809.p1	upregulated	AT3G26310
Acepa_100919.p1	upregulated	AT1G33540
Acepa_018263.p1	upregulated	AT2G32530
Acepa_046535.p1	upregulated	AT5G59070
Acepa_080282.p1	upregulated	AT2G36780
Acepa_067617.p1	upregulated	AT1G43160
Acepa_010135.p1	upregulated	AT3G21865
Acepa_101331.p1	upregulated	AT4G14350
Acepa_033031.p2	upregulated	-
Acepa_104274.p1	upregulated	AT1G23200
Acepa_029607.p1	upregulated	-
Acepa_012797.p1	upregulated	AT5G66280
Acepa_012118.p1	upregulated	AT5G48930
Acepa_010617.p1	upregulated	AT2G45130
Acepa_043916.p1	upregulated	-
Acepa_040645.p1	upregulated	-
Acepa_071430.p1	upregulated	AT2G23180
Acepa_027402.p1	upregulated	AT5G04370
Acepa_042117.p1	upregulated	AT3G21240
Acepa_014214.p1	upregulated	AT5G08640
Acepa_014817.p1	upregulated	AT5G42020
Acepa_076564.p1	upregulated	AT1G19180
Acepa_079043.p1	upregulated	AT5G06860
Acepa_064237.p1	upregulated	AT1G30190
Acepa_023991.p1	upregulated	AT5G06860
Acepa_073563.p1	upregulated	AT1G35710
Acepa_039869.p3	upregulated	AT1G21310
Acepa_023712.p1	upregulated	-
Acepa_059802.p1	upregulated	AT5G60900
Acepa_077760.p1	upregulated	AT1G53820
Acepa_016750.p1	upregulated	AT2G23610
Acepa_071417.p1	upregulated	AT2G26640
Acepa_042470.p2	upregulated	AT1G12240
Acepa_078465.p1	upregulated	AT1G58420
Acepa_032087.p2	upregulated	AT2G27510
Acepa_096757.p1	upregulated	-
Acepa_007011.p1	upregulated	AT1G56580
Acepa_023854.p1	upregulated	AT1G33800
Acepa_101395.p1	upregulated	AT3G21810
Acepa_038174.p2	upregulated	AT1G76680
Acepa_008861.p1	upregulated	AT5G10770
Acepa_037034.p1	upregulated	AT1G45207
Acepa_024427.p1	downregulated	AT1G44960
Acepa_045919.p1	downregulated	-
Acepa_099111.p1	downregulated	AT4G32480
Acepa_078330.p1	downregulated	AT3G13750
Acepa_052232.p2	downregulated	AT2G45960
Acepa_032941.p1	downregulated	-
Acepa_042332.p1	downregulated	AT4G19170
Acepa_034466.p1	downregulated	AT1G36370
Acepa_022290.p1	downregulated	AT1G01320
Acepa_016563.p1	downregulated	AT1G65390
Acepa_050642.p2	downregulated	-
Acepa_051872.p1	downregulated	AT1G02640
Acepa_069184.p1	downregulated	AT1G55760
Acepa_041834.p1	downregulated	-
Acepa_021437.p1	downregulated	AT5G09220
Acepa_012966.p1	downregulated	-
Acepa_096878.p1	downregulated	AT5G57850
Acepa_097565.p1	downregulated	AT4G23160
Acepa_097080.p1	downregulated	ATMG01250
Acepa_019391.p1	downregulated	AT3G23740
Acepa_102812.p1	downregulated	AT5G56550
Acepa_036104.p1	downregulated	AT1G28110
Acepa_033858.p1	downregulated	AT5G46050
Acepa_053529.p2	downregulated	-
Acepa_081220.p1	downregulated	AT2G24210
Acepa_098134.p1	downregulated	AT3G22970
Acepa_094276.p1	downregulated	AT1G79040
Acepa_035880.p1	downregulated	AT3G13750
Acepa_005847.p1	downregulated	AT4G23160
Acepa_039297.p1	downregulated	-
Acepa_044206.p1	downregulated	AT3G07350
Acepa_080565.p1	downregulated	AT1G12240
Acepa_094886.p1	downregulated	AT5G18610
Acepa_077274.p1	downregulated	AT3G24030
Acepa_057408.p1	downregulated	AT1G79040
Acepa_102215.p1	downregulated	AT5G13630
Acepa_084801.p1	downregulated	AT1G22020
Acepa_077967.p1	downregulated	AT1G10500
Acepa_058117.p1	downregulated	AT3G11210
Acepa_013981.p1	downregulated	AT5G13460
Acepa_042309.p1	downregulated	AT3G19010
Acepa_009700.p1	downregulated	AT5G44680
Acepa_078239.p1	downregulated	AT1G62660
Acepa_102032.p1	downregulated	AT3G48740
Acepa_054502.p1	downregulated	-
Acepa_069971.p1	downregulated	-
Acepa_056502.p1	downregulated	AT5G50920
Acepa_081324.p1	downregulated	-
Acepa_039098.p1	downregulated	AT4G22390
Acepa_036981.p1	downregulated	AT1G79730
Acepa_053094.p2	downregulated	AT1G22370
Acepa_013267.p1	downregulated	AT2G26980
Acepa_013214.p1	downregulated	AT4G29210
Acepa_010302.p1	downregulated	AT1G79040
Acepa_075702.p2	downregulated	AT5G49360
Acepa_012566.p1	downregulated	AT5G64940
Acepa_040419.p1	downregulated	AT5G13630
Acepa_016125.p1	downregulated	AT5G07470
Acepa_061353.p1	downregulated	AT4G23160
Acepa_046717.p1	downregulated	-
Acepa_097533.p1	downregulated	-
Acepa_077141.p1	downregulated	-
Acepa_073944.p1	downregulated	ATMG00300
Acepa_104535.p1	downregulated	AT4G28080
Acepa_033337.p1	downregulated	-
Acepa_009037.p2	downregulated	AT1G62660
Acepa_100650.p1	downregulated	-
Acepa_015951.p1	downregulated	AT1G12240
Acepa_009701.p1	downregulated	AT5G44680
Acepa_009866.p1	downregulated	-
Acepa_050114.p1	downregulated	AT1G17220
Acepa_009698.p1	downregulated	AT5G44680
Acepa_019393.p1	downregulated	AT3G23740
Acepa_048485.p1	downregulated	AT2G29990
Acepa_019265.p1	downregulated	ATMG00300
Acepa_042378.p1	downregulated	AT4G33010
Acepa_011692.p1	downregulated	ATMG00850
Acepa_034052.p1	downregulated	AT5G15270
Acepa_054168.p1	downregulated	AT3G19010
Acepa_021788.p1	downregulated	-
Acepa_090358.p1	downregulated	-
Acepa_018094.p2	downregulated	AT5G28780
Acepa_034565.p1	downregulated	AT3G06240
Acepa_037822.p1	downregulated	AT3G57520
Acepa_011220.p1	downregulated	AT2G04030
Acepa_019838.p1	downregulated	AT1G02640
Acepa_055432.p2	downregulated	-
Acepa_073332.p1	downregulated	AT3G17450
Acepa_100424.p1	downregulated	AT3G52990
Acepa_024151.p1	downregulated	AT4G19850
Acepa_033406.p1	downregulated	-
Acepa_098653.p1	downregulated	AT1G05910
Acepa_028131.p1	downregulated	AT3G59060
Acepa_060728.p2	downregulated	-
Acepa_059338.p1	downregulated	AT3G24320
Acepa_078234.p1	downregulated	AT1G62660
Acepa_048413.p1	downregulated	AT3G51030
Acepa_059426.p1	downregulated	AT1G17870
Acepa_036377.p2	downregulated	AT1G52340
Acepa_009170.p1	downregulated	AT1G77330
Acepa_049560.p1	downregulated	-
Acepa_015882.p1	downregulated	AT3G24255
Acepa_053876.p1	downregulated	-
Acepa_059837.p2	downregulated	AT1G43760
Acepa_017403.p1	downregulated	-
Acepa_017518.p1	downregulated	AT4G32010
Acepa_083931.p3	downregulated	-
Acepa_109042.p1	downregulated	-
Acepa_066388.p1	downregulated	-
Acepa_036931.p2	downregulated	-
Acepa_077985.p1	downregulated	AT5G10180
Acepa_098406.p1	downregulated	-
Acepa_059219.p1	downregulated	-
Acepa_055107.p1	downregulated	AT3G46780
Acepa_044312.p1	downregulated	-
Acepa_011824.p1	downregulated	AT5G04885
Acepa_061127.p2	downregulated	AT5G24950
Acepa_102315.p1	downregulated	AT5G63800
Acepa_011826.p1	downregulated	AT5G20950
Acepa_055271.p1	downregulated	-
Acepa_037326.p2	downregulated	AT2G25170
Acepa_015679.p1	downregulated	AT5G50920
Acepa_032998.p1	downregulated	AT3G24255
Acepa_028604.p1	downregulated	AT4G19170
Acepa_075056.p1	downregulated	AT4G23160
Acepa_099024.p1	downregulated	-
Acepa_056676.p1	downregulated	AT3G18290
Acepa_104475.p1	downregulated	AT5G49740
Acepa_028272.p1	downregulated	AT5G57030
Acepa_042627.p2	downregulated	-
Acepa_018432.p2	downregulated	-
Acepa_010676.p1	downregulated	AT3G13750
Acepa_081336.p1	downregulated	AT3G22970
Acepa_042955.p1	downregulated	AT1G36370
Acepa_094916.p1	downregulated	AT5G18880
Acepa_018760.p2	downregulated	AT3G24255
Acepa_031330.p1	downregulated	AT5G40370
Acepa_051873.p2	downregulated	AT1G02640
Acepa_047869.p1	downregulated	AT1G52870
Acepa_035397.p1	downregulated	AT3G57520
Acepa_010678.p1	downregulated	AT3G13750
Acepa_099864.p1	downregulated	AT3G57520
Acepa_012320.p2	downregulated	AT3G57050
Acepa_101654.p1	downregulated	AT5G11600
Acepa_045399.p1	downregulated	AT5G66440
Acepa_011827.p1	downregulated	AT5G20950
Acepa_032566.p1	downregulated	AT5G04560
Acepa_081741.p1	downregulated	AT5G24870
Acepa_047312.p1	downregulated	AT3G13690
Acepa_089787.p2	downregulated	-
Acepa_057808.p1	downregulated	-
Acepa_012925.p1	downregulated	-
Acepa_100385.p1	downregulated	AT4G33010
Acepa_072831.p1	downregulated	-
Acepa_027006.p1	downregulated	AT3G16720
Acepa_041130.p1	downregulated	AT5G46050
Acepa_054170.p1	downregulated	AT3G19010
Acepa_055174.p1	downregulated	AT5G61960
Acepa_036480.p1	downregulated	-
Acepa_034881.p1	downregulated	AT3G42170
Acepa_066651.p1	downregulated	AT1G47580
Acepa_017322.p1	downregulated	AT1G73170
Acepa_095753.p1	downregulated	AT5G64170
Acepa_098800.p1	downregulated	AT5G01120
Acepa_040147.p1	downregulated	AT5G53860
Acepa_061182.p1	downregulated	AT4G35160

## Sheet: Asia-24 0 hpi vs 8 hpi
Gene ID	DE results	TAIR ID			GO annotatied transcripts
Acepa_039132.p1	upregulated	AT1G55020			Response to stress	Response to biotic stimulus
Acepa_097305.p1	upregulated	AT2G32530		Upregulated transcripts	102	57
Acepa_028247.p1	upregulated	AT1G49670		Downregulated transcripts	28	11
Acepa_047563.p1	upregulated	AT2G18340
Acepa_095556.p1	upregulated	AT2G27080
Acepa_009523.p1	upregulated	-
Acepa_028702.p1	upregulated	AT2G17120
Acepa_036190.p1	upregulated	ATMG00520
Acepa_017110.p1	upregulated	AT1G62790
Acepa_018694.p1	upregulated	AT2G39780
Acepa_000089.p1	upregulated	AT4G28310
Acepa_018543.p1	upregulated	AT2G40330
Acepa_026160.p1	upregulated	AT2G17070
Acepa_103602.p1	upregulated	AT3G19000
Acepa_017052.p1	upregulated	AT3G51590
Acepa_032882.p1	upregulated	AT2G32300
Acepa_031254.p1	upregulated	AT1G14290
Acepa_031392.p1	upregulated	AT2G37430
Acepa_040417.p1	upregulated	AT4G20520
Acepa_099683.p1	upregulated	AT2G46960
Acepa_072185.p1	upregulated	AT4G11600
Acepa_083122.p1	upregulated	AT1G34060
Acepa_070052.p1	upregulated	AT5G01320
Acepa_011591.p1	upregulated	AT5G15490
Acepa_010486.p1	upregulated	AT5G03300
Acepa_048973.p1	upregulated	AT1G54970
Acepa_019163.p1	upregulated	AT5G02290
Acepa_034767.p1	upregulated	AT5G17920
Acepa_081111.p1	upregulated	AT2G40330
Acepa_024033.p1	upregulated	AT1G76240
Acepa_104339.p1	upregulated	AT1G34060
Acepa_097139.p1	upregulated	AT1G68280
Acepa_092028.p1	upregulated	AT2G39980
Acepa_039372.p1	upregulated	AT5G56350
Acepa_045318.p1	upregulated	AT3G49720
Acepa_021646.p1	upregulated	AT4G34200
Acepa_047904.p1	upregulated	AT3G23560
Acepa_074928.p2	upregulated	AT1G10070
Acepa_012126.p1	upregulated	AT3G12145
Acepa_034088.p1	upregulated	AT4G39490
Acepa_053750.p1	upregulated	-
Acepa_039926.p2	upregulated	AT4G31920
Acepa_014963.p1	upregulated	AT1G72280
Acepa_079091.p1	upregulated	AT5G23760
Acepa_043078.p1	upregulated	AT1G55020
Acepa_050797.p1	upregulated	AT5G19440
Acepa_046699.p1	upregulated	AT4G37260
Acepa_043043.p1	upregulated	AT2G26640
Acepa_019666.p1	upregulated	AT1G11740
Acepa_039603.p1	upregulated	AT4G13940
Acepa_036439.p1	upregulated	AT2G39130
Acepa_022405.p1	upregulated	AT4G36220
Acepa_068770.p1	upregulated	AT2G41480
Acepa_032176.p1	upregulated	AT1G05010
Acepa_059588.p1	upregulated	AT5G12470
Acepa_018210.p1	upregulated	-
Acepa_050915.p1	upregulated	AT4G34950
Acepa_055051.p1	upregulated	AT2G29570
Acepa_022180.p1	upregulated	-
Acepa_057147.p1	upregulated	AT3G48890
Acepa_006393.p1	upregulated	AT1G76690
Acepa_010488.p1	upregulated	AT5G03300
Acepa_048975.p1	upregulated	AT1G54730
Acepa_039239.p1	upregulated	AT5G45280
Acepa_056072.p1	upregulated	AT5G06860
Acepa_019162.p1	upregulated	AT4G35600
Acepa_047418.p1	upregulated	AT1G24360
Acepa_058196.p1	upregulated	AT2G47140
Acepa_014217.p1	upregulated	AT5G08640
Acepa_105649.p1	upregulated	AT5G44210
Acepa_100849.p1	upregulated	AT5G03300
Acepa_051296.p1	upregulated	AT5G61210
Acepa_016893.p1	upregulated	AT1G24360
Acepa_083686.p1	upregulated	AT5G03300
Acepa_059950.p1	upregulated	AT3G16150
Acepa_041543.p2	upregulated	-
Acepa_028703.p1	upregulated	AT2G17120
Acepa_041691.p1	upregulated	AT2G20340
Acepa_017251.p1	upregulated	AT2G38360
Acepa_102052.p1	upregulated	AT2G20340
Acepa_096445.p1	upregulated	-
Acepa_095656.p1	upregulated	AT1G14290
Acepa_051052.p1	upregulated	AT1G22460
Acepa_053092.p1	upregulated	AT2G20340
Acepa_051728.p1	upregulated	AT5G65780
Acepa_072204.p1	upregulated	AT3G23250
Acepa_029045.p2	upregulated	AT3G51590
Acepa_025178.p1	upregulated	AT5G50200
Acepa_039496.p2	upregulated	AT1G21310
Acepa_053056.p1	upregulated	AT1G78290
Acepa_037350.p1	upregulated	AT5G13750
Acepa_077173.p1	upregulated	AT2G33380
Acepa_014448.p1	upregulated	AT1G08250
Acepa_035197.p1	upregulated	AT4G39490
Acepa_014964.p1	upregulated	AT1G72280
Acepa_031663.p1	upregulated	AT2G39980
Acepa_019709.p1	upregulated	AT3G54170
Acepa_001065.p1	upregulated	AT3G21690
Acepa_028222.p1	upregulated	AT3G13790
Acepa_052395.p1	upregulated	-
Acepa_012744.p1	upregulated	AT1G64660
Acepa_050406.p1	upregulated	AT3G47570
Acepa_034637.p1	upregulated	AT1G55020
Acepa_077623.p1	upregulated	AT2G35980
Acepa_035459.p1	upregulated	AT1G62660
Acepa_092483.p1	upregulated	AT2G32300
Acepa_021821.p1	upregulated	-
Acepa_084802.p1	upregulated	AT4G13930
Acepa_020651.p1	upregulated	AT3G30180
Acepa_105854.p1	upregulated	AT3G06035
Acepa_085159.p1	upregulated	AT3G45970
Acepa_092112.p1	upregulated	-
Acepa_010484.p1	upregulated	AT5G03300
Acepa_024138.p1	upregulated	AT2G46630
Acepa_036954.p1	upregulated	AT3G42170
Acepa_031267.p1	upregulated	AT1G24540
Acepa_059815.p1	upregulated	AT5G14180
Acepa_034223.p1	upregulated	AT1G76680
Acepa_036984.p1	upregulated	AT1G55020
Acepa_058195.p1	upregulated	AT2G47140
Acepa_077621.p1	upregulated	AT2G35980
Acepa_014662.p1	upregulated	AT4G02800
Acepa_023644.p2	upregulated	-
Acepa_094069.p1	upregulated	AT3G19630
Acepa_041284.p1	upregulated	AT1G77330
Acepa_060916.p1	upregulated	-
Acepa_097716.p1	upregulated	AT1G03220
Acepa_047631.p1	upregulated	AT5G06860
Acepa_037902.p1	upregulated	-
Acepa_042503.p1	upregulated	AT2G37790
Acepa_098352.p1	upregulated	AT1G79620
Acepa_037094.p1	upregulated	ATMG01250
Acepa_018544.p1	upregulated	AT2G40330
Acepa_029691.p1	upregulated	AT1G76690
Acepa_029145.p1	upregulated	AT5G05340
Acepa_085260.p1	upregulated	AT3G24500
Acepa_096746.p1	upregulated	AT5G28010
Acepa_096750.p1	upregulated	-
Acepa_035567.p1	upregulated	AT1G76680
Acepa_056073.p1	upregulated	AT5G06860
Acepa_085456.p1	upregulated	-
Acepa_022199.p1	upregulated	AT2G28210
Acepa_058861.p1	upregulated	AT4G27500
Acepa_021905.p1	upregulated	AT5G48050
Acepa_020707.p3	upregulated	AT2G44160
Acepa_048396.p1	upregulated	AT5G48290
Acepa_070788.p1	upregulated	AT1G48880
Acepa_016569.p1	upregulated	AT2G44500
Acepa_011097.p1	upregulated	AT5G17920
Acepa_035241.p1	upregulated	AT3G52990
Acepa_040591.p1	upregulated	AT1G55020
Acepa_035011.p1	upregulated	AT2G40330
Acepa_026809.p1	upregulated	AT3G26310
Acepa_055961.p1	upregulated	AT1G76810
Acepa_099017.p1	upregulated	AT1G14870
Acepa_103735.p1	upregulated	AT1G64060
Acepa_039873.p1	upregulated	AT3G12580
Acepa_032301.p1	upregulated	AT5G50260
Acepa_014689.p1	upregulated	-
Acepa_050804.p1	upregulated	AT5G19440
Acepa_035778.p1	upregulated	AT2G32530
Acepa_021565.p1	upregulated	AT2G46960
Acepa_041966.p1	upregulated	AT1G50410
Acepa_080282.p1	upregulated	AT2G36780
Acepa_083120.p1	upregulated	AT1G34060
Acepa_095657.p1	upregulated	AT1G14290
Acepa_095421.p1	upregulated	AT3G54040
Acepa_059820.p1	upregulated	AT4G28570
Acepa_024321.p1	upregulated	ATMG01250
Acepa_101331.p1	upregulated	AT4G14350
Acepa_081170.p1	upregulated	AT3G28580
Acepa_076061.p1	upregulated	AT1G49670
Acepa_038015.p1	upregulated	AT5G17920
Acepa_022406.p1	upregulated	AT4G36220
Acepa_016713.p1	upregulated	AT5G05320
Acepa_066993.p1	upregulated	AT1G16905
Acepa_055868.p2	upregulated	AT3G26300
Acepa_053577.p1	upregulated	AT5G04370
Acepa_035372.p1	upregulated	AT5G17920
Acepa_066119.p1	upregulated	-
Acepa_050631.p1	upregulated	AT5G05340
Acepa_037601.p1	upregulated	AT5G02500
Acepa_041163.p1	upregulated	AT4G34950
Acepa_046350.p1	upregulated	AT2G26640
Acepa_042132.p1	upregulated	AT1G55020
Acepa_021863.p1	upregulated	AT2G15325
Acepa_059605.p1	upregulated	ATMG00810
Acepa_101006.p1	upregulated	AT3G51590
Acepa_036882.p1	upregulated	AT1G22380
Acepa_037764.p1	upregulated	AT1G12240
Acepa_023173.p1	upregulated	AT5G61210
Acepa_076761.p3	upregulated	AT3G15470
Acepa_032065.p1	upregulated	AT1G70680
Acepa_050015.p1	upregulated	AT3G20390
Acepa_100906.p1	upregulated	AT4G05020
Acepa_076450.p1	upregulated	AT3G05500
Acepa_012674.p1	upregulated	AT1G54730
Acepa_070280.p1	upregulated	AT3G23250
Acepa_098058.p1	upregulated	AT5G06720
Acepa_090451.p1	upregulated	-
Acepa_018970.p1	upregulated	AT4G01870
Acepa_019223.p1	upregulated	AT5G05340
Acepa_028428.p1	upregulated	AT2G25240
Acepa_058364.p1	upregulated	AT1G76680
Acepa_016598.p1	upregulated	AT3G17470
Acepa_028705.p1	upregulated	AT2G17120
Acepa_081178.p1	upregulated	AT5G50200
Acepa_019614.p1	upregulated	AT1G72970
Acepa_018380.p1	upregulated	-
Acepa_100512.p1	upregulated	AT4G34131
Acepa_070639.p1	upregulated	AT3G04720
Acepa_009592.p1	upregulated	AT1G43760
Acepa_042792.p1	upregulated	AT5G51460
Acepa_061945.p1	upregulated	-
Acepa_009844.p1	upregulated	-
Acepa_020554.p1	upregulated	AT1G20960
Acepa_053090.p1	upregulated	AT2G20340
Acepa_066361.p1	upregulated	AT1G10550
Acepa_040491.p1	upregulated	AT1G21310
Acepa_006695.p1	upregulated	AT3G49720
Acepa_020653.p1	upregulated	AT3G30180
Acepa_074560.p1	upregulated	AT5G55050
Acepa_030812.p1	upregulated	-
Acepa_043064.p1	upregulated	AT4G36020
Acepa_045793.p1	upregulated	AT1G75750
Acepa_037451.p1	upregulated	AT1G12240
Acepa_037213.p1	upregulated	AT4G26090
Acepa_052235.p1	upregulated	AT2G40330
Acepa_029316.p1	upregulated	AT3G16150
Acepa_024792.p1	upregulated	AT4G22860
Acepa_011906.p1	upregulated	-
Acepa_031059.p1	upregulated	AT3G14420
Acepa_049713.p1	upregulated	AT2G01300
Acepa_029315.p1	upregulated	AT3G16150
Acepa_074409.p1	upregulated	-
Acepa_095144.p1	upregulated	AT5G51890
Acepa_054371.p1	upregulated	AT4G34660
Acepa_052393.p1	upregulated	AT3G48360
Acepa_067305.p1	upregulated	AT5G22650
Acepa_044353.p2	upregulated	AT5G05365
Acepa_027774.p1	upregulated	AT1G56670
Acepa_034949.p1	upregulated	AT1G22400
Acepa_010135.p1	upregulated	AT3G21865
Acepa_012497.p1	upregulated	AT1G56430
Acepa_029793.p2	upregulated	AT4G15020
Acepa_057200.p1	upregulated	AT1G53820
Acepa_077180.p1	upregulated	AT2G33380
Acepa_028666.p1	upregulated	-
Acepa_030962.p1	upregulated	AT5G17920
Acepa_039416.p1	upregulated	AT4G37360
Acepa_075998.p1	upregulated	AT5G06060
Acepa_024766.p1	upregulated	AT1G62660
Acepa_029313.p1	upregulated	AT3G16150
Acepa_077910.p1	upregulated	AT1G76160
Acepa_062370.p1	upregulated	AT4G33230
Acepa_100135.p1	upregulated	AT5G24080
Acepa_035193.p2	upregulated	-
Acepa_014269.p1	upregulated	AT1G12570
Acepa_018511.p1	upregulated	AT5G18880
Acepa_008817.p1	upregulated	AT1G55020
Acepa_043800.p1	upregulated	AT1G59960
Acepa_039217.p1	upregulated	AT3G16520
Acepa_038119.p1	upregulated	AT2G22250
Acepa_023010.p1	upregulated	AT4G37340
Acepa_030071.p1	upregulated	AT2G29420
Acepa_033829.p1	upregulated	AT1G76680
Acepa_077838.p1	upregulated	AT3G47570
Acepa_010298.p1	upregulated	AT3G13080
Acepa_069764.p1	upregulated	AT4G25830
Acepa_044629.p1	upregulated	AT2G39650
Acepa_032435.p1	upregulated	AT5G20060
Acepa_007251.p1	upregulated	AT1G23480
Acepa_040439.p1	upregulated	AT1G12240
Acepa_049543.p1	upregulated	AT4G13080
Acepa_041308.p1	upregulated	AT1G10070
Acepa_060064.p1	upregulated	AT5G47020
Acepa_040971.p1	upregulated	AT2G25770
Acepa_008818.p1	upregulated	AT1G55020
Acepa_018770.p2	upregulated	-
Acepa_074228.p1	upregulated	-
Acepa_071566.p1	upregulated	AT4G28310
Acepa_035894.p2	upregulated	-
Acepa_028704.p1	upregulated	AT2G17120
Acepa_036655.p1	upregulated	AT1G12240
Acepa_040846.p1	upregulated	AT5G17920
Acepa_076557.p1	upregulated	AT1G19180
Acepa_029033.p1	upregulated	AT3G51000
Acepa_041097.p1	upregulated	AT4G39330
Acepa_022197.p1	upregulated	AT1G08080
Acepa_009357.p1	upregulated	-
Acepa_041060.p1	upregulated	AT1G62660
Acepa_011925.p1	upregulated	AT4G14960
Acepa_021159.p1	upregulated	AT2G28590
Acepa_012131.p1	upregulated	AT1G34040
Acepa_042710.p1	upregulated	AT1G08010
Acepa_095838.p1	upregulated	AT4G25810
Acepa_046483.p1	upregulated	AT5G64810
Acepa_036989.p1	upregulated	AT4G30210
Acepa_057019.p1	upregulated	AT1G49670
Acepa_075802.p1	upregulated	AT5G06860
Acepa_034626.p3	upregulated	AT4G02330
Acepa_005651.p1	upregulated	AT4G24715
Acepa_022682.p1	upregulated	-
Acepa_037770.p2	upregulated	AT4G33070
Acepa_036463.p1	upregulated	AT2G31170
Acepa_017834.p1	upregulated	AT1G56580
Acepa_019161.p1	upregulated	AT5G02290
Acepa_100564.p1	upregulated	AT5G02290
Acepa_045614.p1	upregulated	AT2G27510
Acepa_007042.p1	upregulated	AT1G14390
Acepa_053492.p1	upregulated	-
Acepa_037957.p2	upregulated	ATMG01250
Acepa_036374.p1	upregulated	AT3G24255
Acepa_040512.p2	upregulated	AT5G17920
Acepa_047793.p1	upregulated	AT4G13510
Acepa_100907.p1	upregulated	AT4G05020
Acepa_035057.p1	upregulated	AT2G23180
Acepa_097910.p2	upregulated	AT4G02800
Acepa_019780.p1	upregulated	-
Acepa_040827.p1	upregulated	AT1G15150
Acepa_083670.p1	upregulated	AT5G48930
Acepa_010724.p1	upregulated	AT1G02500
Acepa_031376.p1	upregulated	-
Acepa_099600.p1	upregulated	-
Acepa_026182.p1	upregulated	AT2G15780
Acepa_070578.p2	upregulated	AT1G32100
Acepa_029786.p1	upregulated	AT1G17840
Acepa_011615.p1	upregulated	AT5G06860
Acepa_033011.p1	upregulated	AT5G61890
Acepa_010299.p1	upregulated	AT3G13080
Acepa_015609.p1	upregulated	AT3G22142
Acepa_000818.p1	upregulated	AT1G02205
Acepa_011532.p1	upregulated	AT5G39080
Acepa_033185.p1	upregulated	AT4G21020
Acepa_021862.p1	upregulated	AT2G15325
Acepa_067452.p1	upregulated	AT1G68570
Acepa_019607.p1	upregulated	AT1G74030
Acepa_067374.p1	upregulated	AT1G56150
Acepa_097408.p1	upregulated	AT3G13510
Acepa_027404.p1	upregulated	AT1G19640
Acepa_018191.p1	upregulated	AT4G39840
Acepa_067378.p1	upregulated	AT5G13330
Acepa_072744.p1	upregulated	AT1G76570
Acepa_014956.p1	upregulated	AT5G67400
Acepa_082311.p1	upregulated	AT5G64950
Acepa_006638.p1	upregulated	AT1G67070
Acepa_015985.p1	upregulated	AT4G39330
Acepa_048398.p1	upregulated	AT5G48290
Acepa_030500.p1	upregulated	AT2G22880
Acepa_006883.p1	upregulated	AT1G08080
Acepa_102252.p1	upregulated	AT5G05340
Acepa_010503.p1	upregulated	AT1G61290
Acepa_042086.p1	upregulated	AT1G14290
Acepa_025133.p1	upregulated	AT4G23160
Acepa_029598.p1	upregulated	AT5G45280
Acepa_097387.p1	upregulated	AT2G32300
Acepa_021158.p1	upregulated	AT2G45750
Acepa_017478.p1	upregulated	AT5G48930
Acepa_031646.p1	upregulated	AT4G11600
Acepa_025062.p1	upregulated	AT4G39830
Acepa_039316.p1	upregulated	AT5G54160
Acepa_032354.p1	upregulated	-
Acepa_096603.p1	upregulated	AT1G32100
Acepa_102805.p1	upregulated	AT3G28580
Acepa_060689.p1	upregulated	AT1G69790
Acepa_010528.p1	upregulated	AT4G37360
Acepa_041216.p1	upregulated	AT3G05420
Acepa_036029.p1	upregulated	AT3G60750
Acepa_101401.p1	upregulated	AT2G32300
Acepa_106623.p1	upregulated	-
Acepa_075997.p1	upregulated	AT5G06060
Acepa_076396.p1	upregulated	AT4G23160
Acepa_009133.p1	upregulated	AT4G39490
Acepa_038507.p1	upregulated	AT1G76680
Acepa_065899.p1	upregulated	AT2G46490
Acepa_042646.p1	upregulated	AT4G13940
Acepa_040524.p1	upregulated	AT1G76680
Acepa_010489.p1	upregulated	AT5G03300
Acepa_096747.p2	upregulated	-
Acepa_027403.p1	upregulated	AT5G04370
Acepa_046091.p1	upregulated	AT1G32450
Acepa_039610.p1	upregulated	AT2G37040
Acepa_077952.p1	upregulated	AT1G53000
Acepa_038350.p1	upregulated	AT2G01050
Acepa_096749.p1	upregulated	-
Acepa_052399.p1	upregulated	AT5G63160
Acepa_098102.p1	upregulated	AT5G42170
Acepa_012341.p1	upregulated	AT2G35060
Acepa_074489.p1	upregulated	AT3G59220
Acepa_014661.p1	upregulated	AT4G02800
Acepa_097943.p1	upregulated	-
Acepa_040669.p1	upregulated	AT4G26200
Acepa_039942.p1	upregulated	AT1G55020
Acepa_005650.p1	upregulated	AT5G50200
Acepa_029692.p1	upregulated	AT1G76680
Acepa_101911.p1	upregulated	AT4G24520
Acepa_074227.p1	upregulated	-
Acepa_070640.p1	upregulated	AT3G04720
Acepa_041039.p1	upregulated	ATMG00480
Acepa_023007.p1	upregulated	AT5G06390
Acepa_047903.p2	upregulated	AT3G23550
Acepa_048888.p1	upregulated	AT2G41380
Acepa_030604.p1	upregulated	-
Acepa_076056.p1	upregulated	AT2G25770
Acepa_099663.p1	upregulated	AT3G21865
Acepa_059450.p1	upregulated	-
Acepa_039596.p1	upregulated	AT1G55020
Acepa_071347.p1	upregulated	AT5G02230
Acepa_015952.p1	upregulated	AT5G47430
Acepa_103385.p1	upregulated	AT4G23160
Acepa_009078.p1	upregulated	AT5G28840
Acepa_081108.p1	upregulated	AT5G28010
Acepa_029694.p1	upregulated	AT1G76690
Acepa_054376.p1	upregulated	AT4G34660
Acepa_028430.p1	upregulated	AT2G25240
Acepa_027280.p1	upregulated	AT5G13330
Acepa_008859.p1	upregulated	AT5G10770
Acepa_029028.p1	upregulated	AT4G11290
Acepa_042313.p1	upregulated	AT1G55020
Acepa_022891.p1	upregulated	AT5G38700
Acepa_036933.p1	upregulated	AT3G60160
Acepa_031482.p1	upregulated	AT2G32300
Acepa_005530.p1	upregulated	AT1G06620
Acepa_034766.p1	upregulated	AT1G34060
Acepa_036011.p1	upregulated	AT2G39050
Acepa_077841.p1	upregulated	-
Acepa_042938.p1	upregulated	-
Acepa_054218.p1	upregulated	-
Acepa_094602.p1	upregulated	AT3G06240
Acepa_103036.p1	upregulated	AT3G02100
Acepa_026164.p1	upregulated	AT5G25265
Acepa_034684.p1	upregulated	AT2G30490
Acepa_079473.p1	upregulated	AT2G38290
Acepa_026482.p1	upregulated	AT3G52990
Acepa_012496.p1	upregulated	AT5G04950
Acepa_030499.p1	upregulated	AT2G22880
Acepa_085163.p1	upregulated	AT5G67020
Acepa_057745.p1	upregulated	AT3G05420
Acepa_036139.p1	upregulated	AT2G32300
Acepa_067608.p1	upregulated	-
Acepa_018263.p1	upregulated	AT2G32530
Acepa_067617.p1	upregulated	AT1G43160
Acepa_100566.p1	upregulated	AT2G17220
Acepa_040310.p1	upregulated	-
Acepa_035250.p1	upregulated	AT2G39630
Acepa_078014.p1	upregulated	AT2G16760
Acepa_073396.p1	upregulated	AT2G41380
Acepa_043916.p1	upregulated	-
Acepa_095045.p1	upregulated	AT4G25830
Acepa_071430.p1	upregulated	AT2G23180
Acepa_027402.p1	upregulated	AT5G04370
Acepa_014214.p1	upregulated	AT5G08640
Acepa_016391.p1	upregulated	AT1G32170
Acepa_068557.p1	upregulated	AT3G06890
Acepa_048974.p1	upregulated	AT2G48020
Acepa_064237.p1	upregulated	AT1G30190
Acepa_023991.p1	upregulated	AT5G06860
Acepa_056005.p1	upregulated	-
Acepa_023712.p1	upregulated	-
Acepa_050021.p1	upregulated	AT1G65610
Acepa_077760.p1	upregulated	AT1G53820
Acepa_094070.p1	upregulated	AT3G19630
Acepa_042470.p2	upregulated	AT1G12240
Acepa_102134.p1	upregulated	AT3G59970
Acepa_078465.p1	upregulated	AT1G58420
Acepa_032087.p2	upregulated	AT2G27510
Acepa_096757.p1	upregulated	-
Acepa_007011.p1	upregulated	AT1G56580
Acepa_037163.p1	upregulated	AT1G55020
Acepa_077175.p1	upregulated	AT2G33380
Acepa_101395.p1	upregulated	AT3G21810
Acepa_038174.p2	upregulated	AT1G76680
Acepa_026528.p1	upregulated	AT2G41640
Acepa_019280.p2	upregulated	-
Acepa_073563.p1	upregulated	AT1G35710
Acepa_028408.p1	upregulated	AT4G16260
Acepa_018889.p1	downregulated	AT3G16360
Acepa_034044.p1	downregulated	-
Acepa_061091.p1	downregulated	-
Acepa_075709.p1	downregulated	AT5G67030
Acepa_070646.p1	downregulated	AT1G12110
Acepa_099111.p1	downregulated	AT4G32480
Acepa_009471.p1	downregulated	-
Acepa_015384.p1	downregulated	AT1G43760
Acepa_097918.p1	downregulated	AT1G65390
Acepa_077369.p1	downregulated	AT2G44480
Acepa_057809.p1	downregulated	AT5G48050
Acepa_042332.p1	downregulated	AT4G19170
Acepa_016563.p1	downregulated	AT1G65390
Acepa_024925.p1	downregulated	AT5G43700
Acepa_037318.p1	downregulated	AT3G24255
Acepa_048482.p1	downregulated	AT2G29990
Acepa_021437.p1	downregulated	AT5G09220
Acepa_013294.p1	downregulated	-
Acepa_100864.p1	downregulated	AT3G16360
Acepa_067216.p1	downregulated	AT4G00895
Acepa_049464.p1	downregulated	AT3G54500
Acepa_025398.p1	downregulated	AT5G22090
Acepa_102812.p1	downregulated	AT5G56550
Acepa_077985.p1	downregulated	AT5G10180
Acepa_036322.p1	downregulated	AT1G12110
Acepa_009104.p1	downregulated	AT5G49730
Acepa_044206.p1	downregulated	AT3G07350
Acepa_025397.p1	downregulated	AT5G22090
Acepa_102215.p1	downregulated	AT5G13630
Acepa_084801.p1	downregulated	AT1G22020
Acepa_095386.p1	downregulated	AT4G35160
Acepa_009700.p1	downregulated	AT5G44680
Acepa_078838.p1	downregulated	AT4G19850
Acepa_085337.p1	downregulated	AT5G59780
Acepa_049490.p1	downregulated	AT2G46790
Acepa_056502.p1	downregulated	AT5G50920
Acepa_042378.p1	downregulated	AT4G33010
Acepa_033079.p1	downregulated	ATMG00810
Acepa_018890.p1	downregulated	AT3G16360
Acepa_100309.p1	downregulated	AT5G44640
Acepa_080565.p1	downregulated	AT1G12240
Acepa_098906.p1	downregulated	AT2G25930
Acepa_075702.p2	downregulated	AT5G49360
Acepa_016125.p1	downregulated	AT5G07470
Acepa_021066.p1	downregulated	AT3G16360
Acepa_041081.p1	downregulated	AT2G34430
Acepa_030849.p1	downregulated	AT3G62040
Acepa_069920.p1	downregulated	AT1G20030
Acepa_017495.p1	downregulated	AT5G13200
Acepa_100650.p1	downregulated	-
Acepa_009701.p1	downregulated	AT5G44680
Acepa_103396.p1	downregulated	AT1G62660
Acepa_019968.p1	downregulated	AT1G60590
Acepa_073332.p1	downregulated	AT3G17450
Acepa_009698.p1	downregulated	AT5G44680
Acepa_048485.p1	downregulated	AT2G29990
Acepa_009220.p3	downregulated	AT1G49270
Acepa_035995.p1	downregulated	AT1G22770
Acepa_018891.p1	downregulated	AT3G16360
Acepa_066641.p1	downregulated	AT4G10850
Acepa_095753.p1	downregulated	AT5G64170
Acepa_021673.p1	downregulated	AT5G23660
Acepa_100385.p1	downregulated	AT4G33010
Acepa_011936.p2	downregulated	AT4G35150
Acepa_021671.p1	downregulated	AT5G23660
Acepa_059265.p1	downregulated	AT5G06580
Acepa_018912.p2	downregulated	-
Acepa_049012.p2	downregulated	AT5G02020
Acepa_012566.p1	downregulated	AT5G64940
Acepa_053372.p1	downregulated	AT2G23600
Acepa_019961.p2	downregulated	AT1G10640
Acepa_096407.p1	downregulated	AT4G35160
Acepa_015042.p1	downregulated	AT5G07610
Acepa_030848.p1	downregulated	AT3G62040
Acepa_024151.p1	downregulated	AT4G19850
Acepa_033406.p1	downregulated	-
Acepa_011624.p1	downregulated	AT3G13750
Acepa_057869.p1	downregulated	AT5G49660
Acepa_017855.p1	downregulated	AT1G18620
Acepa_011031.p1	downregulated	AT5G02810
Acepa_041123.p1	downregulated	AT1G12240
Acepa_009229.p1	downregulated	AT5G50920
Acepa_036267.p1	downregulated	AT5G49630
Acepa_059426.p1	downregulated	AT1G17870
Acepa_019963.p1	downregulated	AT1G60590
Acepa_036877.p1	downregulated	AT5G02810
Acepa_008810.p1	downregulated	AT5G10930
Acepa_034968.p1	downregulated	AT5G49730
Acepa_029355.p1	downregulated	AT5G25190
Acepa_093931.p1	downregulated	AT5G14940
Acepa_037716.p1	downregulated	AT5G02810
Acepa_045636.p1	downregulated	AT4G30550
Acepa_066388.p1	downregulated	-
Acepa_057810.p1	downregulated	-
Acepa_019965.p1	downregulated	AT1G60590
Acepa_085991.p1	downregulated	AT5G49740
Acepa_031937.p1	downregulated	AT2G20880
Acepa_018806.p1	downregulated	AT2G40610
Acepa_028604.p1	downregulated	AT4G19170
Acepa_104475.p1	downregulated	AT5G49740
Acepa_028272.p1	downregulated	AT5G57030
Acepa_010676.p1	downregulated	AT3G13750
Acepa_100304.p1	downregulated	AT5G44640
Acepa_046456.p1	downregulated	AT2G16050
Acepa_042955.p1	downregulated	AT1G36370
Acepa_052720.p2	downregulated	-
Acepa_009472.p1	downregulated	-
Acepa_026733.p1	downregulated	AT5G03390
Acepa_041186.p1	downregulated	AT5G02810
Acepa_051873.p2	downregulated	AT1G02640
Acepa_012320.p2	downregulated	AT3G57050
Acepa_045399.p1	downregulated	AT5G66440
Acepa_019964.p1	downregulated	AT1G60590
Acepa_107757.p2	downregulated	-
Acepa_015951.p1	downregulated	AT1G12240
Acepa_089787.p2	downregulated	-
Acepa_057808.p1	downregulated	-
Acepa_012925.p1	downregulated	-
Acepa_020361.p1	downregulated	AT3G11410
Acepa_075380.p2	downregulated	AT3G11410
Acepa_031995.p1	downregulated	AT4G19850
Acepa_027006.p1	downregulated	AT3G16720
Acepa_094247.p1	downregulated	AT2G16050
Acepa_047354.p1	downregulated	AT3G07340
Acepa_011124.p2	downregulated	AT5G42260
Acepa_034881.p1	downregulated	AT3G42170
Acepa_011937.p2	downregulated	AT4G35150
Acepa_040419.p1	downregulated	AT5G13630
Acepa_032020.p1	downregulated	-
Acepa_033847.p1	downregulated	AT5G67030
Acepa_097915.p1	downregulated	AT1G65390

## Sheet: Asia-24 0 hpi vs 16 hpi
Gene ID	DE results	TAIR ID			GO annotatied transcripts
Acepa_039534.p1	upregulated	AT3G61510			Response to stress	Response to biotic stimulus
Acepa_078014.p1	upregulated	AT2G16760		Upregulated transcripts	146	70
Acepa_020507.p1	upregulated	AT3G59970		Downregulated transcripts	48	20
Acepa_097305.p1	upregulated	AT2G32530
Acepa_028247.p1	upregulated	AT1G49670
Acepa_011661.p1	upregulated	AT5G02070
Acepa_021432.p1	upregulated	AT5G05340
Acepa_047563.p1	upregulated	AT2G18340
Acepa_027380.p1	upregulated	AT3G12170
Acepa_007992.p1	upregulated	AT5G11790
Acepa_060679.p1	upregulated	AT3G21420
Acepa_100990.p1	upregulated	AT1G77330
Acepa_009523.p1	upregulated	-
Acepa_051728.p1	upregulated	AT5G65780
Acepa_017110.p1	upregulated	AT1G62790
Acepa_000089.p1	upregulated	AT4G28310
Acepa_018543.p1	upregulated	AT2G40330
Acepa_026160.p1	upregulated	AT2G17070
Acepa_042200.p1	upregulated	AT4G14960
Acepa_103602.p1	upregulated	AT3G19000
Acepa_084092.p1	upregulated	AT1G79560
Acepa_072204.p1	upregulated	AT3G23250
Acepa_030962.p1	upregulated	AT5G17920
Acepa_081167.p1	upregulated	AT5G40010
Acepa_051998.p1	upregulated	AT2G01050
Acepa_032882.p1	upregulated	AT2G32300
Acepa_016055.p1	upregulated	AT5G53420
Acepa_034084.p1	upregulated	AT3G29360
Acepa_031392.p1	upregulated	AT2G37430
Acepa_038053.p1	upregulated	AT2G40550
Acepa_040417.p1	upregulated	AT4G20520
Acepa_099683.p1	upregulated	AT2G46960
Acepa_072185.p1	upregulated	AT4G11600
Acepa_034275.p2	upregulated	AT4G14960
Acepa_049034.p1	upregulated	AT1G22882
Acepa_094818.p1	upregulated	AT5G61160
Acepa_011591.p1	upregulated	AT5G15490
Acepa_010486.p1	upregulated	AT5G03300
Acepa_043973.p1	upregulated	AT1G25240
Acepa_048973.p1	upregulated	AT1G54970
Acepa_039283.p1	upregulated	AT3G54700
Acepa_019163.p1	upregulated	AT5G02290
Acepa_037670.p1	upregulated	AT2G37040
Acepa_041095.p1	upregulated	AT1G60220
Acepa_073436.p1	upregulated	-
Acepa_034767.p1	upregulated	AT5G17920
Acepa_092793.p2	upregulated	AT5G01740
Acepa_081111.p1	upregulated	AT2G40330
Acepa_101405.p1	upregulated	AT3G21810
Acepa_033210.p1	upregulated	AT1G22360
Acepa_055868.p2	upregulated	AT3G26300
Acepa_024033.p1	upregulated	AT1G76240
Acepa_022537.p1	upregulated	AT1G34060
Acepa_041753.p1	upregulated	AT5G41880
Acepa_029313.p1	upregulated	AT3G16150
Acepa_051681.p1	upregulated	AT1G77330
Acepa_097139.p1	upregulated	AT1G68280
Acepa_009148.p2	upregulated	AT2G29550
Acepa_092028.p1	upregulated	AT2G39980
Acepa_041966.p1	upregulated	AT1G50410
Acepa_084561.p2	upregulated	AT5G10840
Acepa_039219.p1	upregulated	AT5G17920
Acepa_092467.p1	upregulated	AT1G67730
Acepa_045318.p1	upregulated	AT3G49720
Acepa_035759.p1	upregulated	AT1G78060
Acepa_021646.p1	upregulated	AT4G34200
Acepa_047904.p1	upregulated	AT3G23560
Acepa_074928.p2	upregulated	AT1G10070
Acepa_012126.p1	upregulated	AT3G12145
Acepa_012497.p1	upregulated	AT1G56430
Acepa_011986.p1	upregulated	AT3G05740
Acepa_077747.p1	upregulated	AT1G67070
Acepa_053750.p1	upregulated	-
Acepa_071432.p1	upregulated	AT1G73805
Acepa_087182.p1	upregulated	AT5G19040
Acepa_012495.p1	upregulated	AT1G56430
Acepa_024829.p1	upregulated	AT1G76160
Acepa_070664.p1	upregulated	AT1G05370
Acepa_097661.p1	upregulated	-
Acepa_025448.p1	upregulated	AT3G10080
Acepa_079091.p1	upregulated	AT5G23760
Acepa_014217.p1	upregulated	AT5G08640
Acepa_019666.p1	upregulated	AT1G11740
Acepa_028390.p1	upregulated	AT3G11320
Acepa_022405.p1	upregulated	AT4G36220
Acepa_068770.p1	upregulated	AT2G41480
Acepa_035566.p1	upregulated	AT1G67320
Acepa_068203.p1	upregulated	AT3G28210
Acepa_032176.p1	upregulated	AT1G05010
Acepa_081618.p1	upregulated	AT2G47140
Acepa_035005.p1	upregulated	AT4G19120
Acepa_018210.p1	upregulated	-
Acepa_036473.p1	upregulated	AT5G49810
Acepa_055051.p1	upregulated	AT2G29570
Acepa_022180.p1	upregulated	-
Acepa_057147.p1	upregulated	AT3G48890
Acepa_010488.p1	upregulated	AT5G03300
Acepa_048975.p1	upregulated	AT1G54730
Acepa_058506.p1	upregulated	AT2G17230
Acepa_056072.p1	upregulated	AT5G06860
Acepa_019162.p1	upregulated	AT4G35600
Acepa_047418.p1	upregulated	AT1G24360
Acepa_030319.p2	upregulated	-
Acepa_058196.p1	upregulated	AT2G47140
Acepa_001065.p1	upregulated	AT3G21690
Acepa_072089.p1	upregulated	AT2G02980
Acepa_076448.p1	upregulated	AT1G17710
Acepa_015125.p1	upregulated	AT1G14590
Acepa_105649.p1	upregulated	AT5G44210
Acepa_100849.p1	upregulated	AT5G03300
Acepa_077175.p1	upregulated	AT2G33380
Acepa_034262.p1	upregulated	AT1G44900
Acepa_059820.p1	upregulated	AT4G28570
Acepa_028965.p1	upregulated	AT5G07220
Acepa_011516.p1	upregulated	AT5G58090
Acepa_016893.p1	upregulated	AT1G24360
Acepa_059450.p1	upregulated	-
Acepa_083686.p1	upregulated	AT5G03300
Acepa_028703.p1	upregulated	AT2G17120
Acepa_000909.p1	upregulated	AT4G07960
Acepa_041691.p1	upregulated	AT2G20340
Acepa_017251.p1	upregulated	AT2G38360
Acepa_040706.p1	upregulated	AT2G19880
Acepa_085160.p1	upregulated	AT3G45970
Acepa_102052.p1	upregulated	AT2G20340
Acepa_014448.p1	upregulated	AT1G08250
Acepa_041732.p1	upregulated	AT5G11880
Acepa_051052.p1	upregulated	AT1G22460
Acepa_053092.p1	upregulated	AT2G20340
Acepa_082884.p1	upregulated	AT3G51070
Acepa_042555.p1	upregulated	AT1G67630
Acepa_029350.p1	upregulated	AT3G60870
Acepa_037647.p1	upregulated	AT4G26850
Acepa_077712.p1	upregulated	AT5G37600
Acepa_024279.p1	upregulated	AT5G54160
Acepa_025178.p1	upregulated	AT5G50200
Acepa_049629.p1	upregulated	AT4G14880
Acepa_019058.p1	upregulated	AT1G01050
Acepa_074364.p1	upregulated	AT1G34300
Acepa_068193.p1	upregulated	AT5G01740
Acepa_039496.p2	upregulated	AT1G21310
Acepa_077595.p1	upregulated	AT3G62270
Acepa_017918.p1	upregulated	AT1G67590
Acepa_037350.p1	upregulated	AT5G13750
Acepa_077173.p1	upregulated	AT2G33380
Acepa_027844.p1	upregulated	AT5G06860
Acepa_051999.p1	upregulated	-
Acepa_095656.p1	upregulated	AT1G14290
Acepa_069186.p1	upregulated	AT1G08880
Acepa_035197.p1	upregulated	AT4G39490
Acepa_022406.p1	upregulated	AT4G36220
Acepa_068204.p1	upregulated	AT3G28210
Acepa_084802.p1	upregulated	AT4G13930
Acepa_031663.p1	upregulated	AT2G39980
Acepa_052757.p1	upregulated	AT4G16260
Acepa_050849.p1	upregulated	AT5G55050
Acepa_028222.p1	upregulated	AT3G13790
Acepa_050406.p1	upregulated	AT3G47570
Acepa_023533.p1	upregulated	AT4G35160
Acepa_077623.p1	upregulated	AT2G35980
Acepa_035459.p1	upregulated	AT1G62660
Acepa_035554.p1	upregulated	AT2G04780
Acepa_092483.p1	upregulated	AT2G32300
Acepa_072924.p1	upregulated	AT1G22360
Acepa_097961.p1	upregulated	-
Acepa_055947.p1	upregulated	AT2G30490
Acepa_103747.p1	upregulated	AT1G58360
Acepa_036787.p1	upregulated	AT5G17920
Acepa_076061.p1	upregulated	AT1G49670
Acepa_020651.p1	upregulated	AT3G30180
Acepa_105854.p1	upregulated	AT3G06035
Acepa_085159.p1	upregulated	AT3G45970
Acepa_017101.p1	upregulated	AT5G17920
Acepa_010484.p1	upregulated	AT5G03300
Acepa_024138.p1	upregulated	AT2G46630
Acepa_036954.p1	upregulated	AT3G42170
Acepa_031267.p1	upregulated	AT1G24540
Acepa_037946.p1	upregulated	AT1G53730
Acepa_045942.p1	upregulated	AT5G45550
Acepa_034223.p1	upregulated	AT1G76680
Acepa_048584.p1	upregulated	AT5G41920
Acepa_039519.p1	upregulated	AT5G23420
Acepa_058195.p1	upregulated	AT2G47140
Acepa_077621.p1	upregulated	AT2G35980
Acepa_032149.p1	upregulated	AT5G09530
Acepa_014662.p1	upregulated	AT4G02800
Acepa_023644.p2	upregulated	-
Acepa_034280.p1	upregulated	AT4G13710
Acepa_078151.p1	upregulated	AT3G24660
Acepa_015533.p1	upregulated	-
Acepa_010579.p1	upregulated	AT5G64260
Acepa_022197.p1	upregulated	AT1G08080
Acepa_036973.p1	upregulated	AT4G32300
Acepa_055389.p2	upregulated	AT3G23980
Acepa_037902.p1	upregulated	-
Acepa_042503.p1	upregulated	AT2G37790
Acepa_025708.p1	upregulated	AT4G32940
Acepa_013189.p1	upregulated	AT1G45688
Acepa_037094.p1	upregulated	ATMG01250
Acepa_028508.p1	upregulated	AT1G08280
Acepa_018544.p1	upregulated	AT2G40330
Acepa_029691.p1	upregulated	AT1G76690
Acepa_070052.p1	upregulated	AT5G01320
Acepa_029145.p1	upregulated	AT5G05340
Acepa_085260.p1	upregulated	AT3G24500
Acepa_096746.p1	upregulated	AT5G28010
Acepa_082074.p1	upregulated	AT3G21240
Acepa_027378.p1	upregulated	AT5G56170
Acepa_049041.p1	upregulated	AT1G22882
Acepa_030500.p1	upregulated	AT2G22880
Acepa_035567.p1	upregulated	AT1G76680
Acepa_056073.p1	upregulated	AT5G06860
Acepa_018546.p1	upregulated	AT2G40330
Acepa_085456.p1	upregulated	-
Acepa_022199.p1	upregulated	AT2G28210
Acepa_040799.p1	upregulated	AT5G06390
Acepa_079767.p1	upregulated	AT1G22840
Acepa_009078.p1	upregulated	AT5G28840
Acepa_011468.p1	upregulated	AT5G52060
Acepa_021905.p1	upregulated	AT5G48050
Acepa_011467.p1	upregulated	AT5G52060
Acepa_020707.p3	upregulated	AT2G44160
Acepa_048396.p1	upregulated	AT5G48290
Acepa_070788.p1	upregulated	AT1G48880
Acepa_015130.p1	upregulated	AT2G45300
Acepa_103385.p1	upregulated	AT4G23160
Acepa_035241.p1	upregulated	AT3G52990
Acepa_024257.p1	upregulated	-
Acepa_077841.p1	upregulated	-
Acepa_035011.p1	upregulated	AT2G40330
Acepa_010210.p1	upregulated	AT5G58380
Acepa_012344.p1	upregulated	AT3G14390
Acepa_066460.p1	upregulated	AT1G67730
Acepa_102134.p1	upregulated	AT3G59970
Acepa_067048.p1	upregulated	AT5G14790
Acepa_042767.p1	upregulated	AT5G46280
Acepa_043022.p1	upregulated	AT1G65840
Acepa_055961.p1	upregulated	AT1G76810
Acepa_103735.p1	upregulated	AT1G64060
Acepa_040866.p1	upregulated	AT4G31890
Acepa_067452.p1	upregulated	AT1G68570
Acepa_028702.p1	upregulated	AT2G17120
Acepa_040229.p2	upregulated	AT1G02205
Acepa_031716.p1	upregulated	AT3G54770
Acepa_078769.p1	upregulated	AT2G35660
Acepa_083122.p1	upregulated	AT1G34060
Acepa_034477.p1	upregulated	AT4G19020
Acepa_035778.p1	upregulated	AT2G32530
Acepa_021565.p1	upregulated	AT2G46960
Acepa_023653.p1	upregulated	AT1G24020
Acepa_033776.p1	upregulated	AT2G05940
Acepa_005311.p1	upregulated	AT5G50850
Acepa_036160.p1	upregulated	AT1G12240
Acepa_035959.p1	upregulated	AT5G20950
Acepa_083120.p1	upregulated	AT1G34060
Acepa_065899.p1	upregulated	AT2G46490
Acepa_059950.p1	upregulated	AT3G16150
Acepa_006626.p1	upregulated	AT2G22795
Acepa_023652.p1	upregulated	-
Acepa_059815.p1	upregulated	AT5G14180
Acepa_100887.p1	upregulated	AT1G51210
Acepa_023752.p1	upregulated	AT5G62700
Acepa_019780.p1	upregulated	-
Acepa_101331.p1	upregulated	AT4G14350
Acepa_048316.p1	upregulated	AT4G13660
Acepa_081170.p1	upregulated	AT3G28580
Acepa_038015.p1	upregulated	AT5G17920
Acepa_097327.p1	upregulated	AT3G25250
Acepa_016713.p1	upregulated	AT5G05320
Acepa_055137.p1	upregulated	AT5G54160
Acepa_066993.p1	upregulated	AT1G16905
Acepa_011332.p1	upregulated	AT3G18000
Acepa_042122.p1	upregulated	AT2G22250
Acepa_096908.p1	upregulated	AT4G13080
Acepa_031482.p1	upregulated	AT2G32300
Acepa_035372.p1	upregulated	AT5G17920
Acepa_097716.p1	upregulated	AT1G03220
Acepa_042522.p1	upregulated	AT3G21240
Acepa_038271.p1	upregulated	AT1G15950
Acepa_051637.p1	upregulated	AT4G34420
Acepa_029086.p1	upregulated	AT3G51790
Acepa_055999.p1	upregulated	AT4G35300
Acepa_000201.p1	upregulated	AT3G54950
Acepa_046350.p1	upregulated	AT2G26640
Acepa_080250.p1	upregulated	AT5G47870
Acepa_005788.p1	upregulated	AT4G27435
Acepa_045961.p1	upregulated	AT3G18000
Acepa_068769.p1	upregulated	AT2G41480
Acepa_095775.p1	upregulated	AT3G45970
Acepa_084602.p1	upregulated	AT2G16430
Acepa_059605.p1	upregulated	ATMG00810
Acepa_101006.p1	upregulated	AT3G51590
Acepa_036882.p1	upregulated	AT1G22380
Acepa_026286.p1	upregulated	-
Acepa_095657.p1	upregulated	AT1G14290
Acepa_037764.p1	upregulated	AT1G12240
Acepa_068524.p1	upregulated	AT1G64980
Acepa_024277.p1	upregulated	AT5G54160
Acepa_076761.p3	upregulated	AT3G15470
Acepa_032065.p1	upregulated	AT1G70680
Acepa_050015.p1	upregulated	AT3G20390
Acepa_100906.p1	upregulated	AT4G05020
Acepa_010509.p1	upregulated	AT5G50850
Acepa_040402.p1	upregulated	AT5G01320
Acepa_012674.p1	upregulated	AT1G54730
Acepa_076975.p1	upregulated	AT4G00430
Acepa_090451.p1	upregulated	-
Acepa_018970.p1	upregulated	AT4G01870
Acepa_019223.p1	upregulated	AT5G05340
Acepa_028428.p1	upregulated	AT2G25240
Acepa_035193.p2	upregulated	-
Acepa_072429.p1	upregulated	AT1G01480
Acepa_016598.p1	upregulated	AT3G17470
Acepa_044121.p1	upregulated	AT3G25900
Acepa_028705.p1	upregulated	AT2G17120
Acepa_081178.p1	upregulated	AT5G50200
Acepa_048751.p1	upregulated	AT1G51210
Acepa_019614.p1	upregulated	AT1G72970
Acepa_039818.p1	upregulated	AT5G66750
Acepa_070639.p1	upregulated	AT3G04720
Acepa_015924.p1	upregulated	AT4G20520
Acepa_015131.p1	upregulated	AT2G45300
Acepa_042792.p1	upregulated	AT5G51460
Acepa_032727.p1	upregulated	-
Acepa_071347.p1	upregulated	AT5G02230
Acepa_009844.p1	upregulated	-
Acepa_032867.p1	upregulated	AT5G15100
Acepa_039239.p1	upregulated	AT5G45280
Acepa_053090.p1	upregulated	AT2G20340
Acepa_069506.p1	upregulated	AT1G69370
Acepa_036912.p2	upregulated	AT4G28680
Acepa_066361.p1	upregulated	AT1G10550
Acepa_040491.p1	upregulated	AT1G21310
Acepa_061468.p1	upregulated	AT5G45380
Acepa_100727.p1	upregulated	AT1G14290
Acepa_006695.p1	upregulated	AT3G49720
Acepa_079473.p1	upregulated	AT2G38290
Acepa_034155.p3	upregulated	AT1G50010
Acepa_074560.p1	upregulated	AT5G55050
Acepa_030812.p1	upregulated	-
Acepa_043064.p1	upregulated	AT4G36020
Acepa_045793.p1	upregulated	AT1G75750
Acepa_037451.p1	upregulated	AT1G12240
Acepa_052235.p1	upregulated	AT2G40330
Acepa_029316.p1	upregulated	AT3G16150
Acepa_011906.p1	upregulated	-
Acepa_100907.p1	upregulated	AT4G05020
Acepa_049713.p1	upregulated	AT2G01300
Acepa_005650.p1	upregulated	AT5G50200
Acepa_047903.p2	upregulated	AT3G23550
Acepa_095144.p1	upregulated	AT5G51890
Acepa_085070.p1	upregulated	AT1G15170
Acepa_074802.p1	upregulated	AT5G20950
Acepa_052393.p1	upregulated	AT3G48360
Acepa_023532.p1	upregulated	AT4G35160
Acepa_069661.p1	upregulated	-
Acepa_098058.p1	upregulated	AT5G06720
Acepa_021366.p1	upregulated	AT3G57550
Acepa_011331.p1	upregulated	AT3G18000
Acepa_015985.p1	upregulated	AT4G39330
Acepa_055133.p1	upregulated	AT5G54160
Acepa_080249.p1	upregulated	AT5G47870
Acepa_037176.p1	upregulated	AT5G65360
Acepa_056931.p1	upregulated	AT5G56530
Acepa_040153.p1	upregulated	AT4G14960
Acepa_014956.p1	upregulated	AT5G67400
Acepa_093210.p1	upregulated	AT4G28310
Acepa_006522.p1	upregulated	AT5G02560
Acepa_046474.p1	upregulated	AT4G27950
Acepa_006519.p1	upregulated	AT5G59870
Acepa_057200.p1	upregulated	AT1G53820
Acepa_077180.p1	upregulated	AT2G33380
Acepa_034684.p1	upregulated	AT2G30490
Acepa_048398.p1	upregulated	AT5G48290
Acepa_028666.p1	upregulated	-
Acepa_031484.p1	upregulated	AT1G70780
Acepa_040655.p1	upregulated	AT1G21310
Acepa_022485.p1	upregulated	AT1G50010
Acepa_075998.p1	upregulated	AT5G06060
Acepa_071566.p1	upregulated	AT4G28310
Acepa_018191.p1	upregulated	AT4G39840
Acepa_040781.p1	upregulated	AT3G18170
Acepa_039372.p1	upregulated	AT5G56350
Acepa_010671.p1	upregulated	AT2G17230
Acepa_035451.p1	upregulated	AT3G25570
Acepa_077910.p1	upregulated	AT1G76160
Acepa_059588.p1	upregulated	AT5G12470
Acepa_074244.p1	upregulated	-
Acepa_071727.p1	upregulated	AT5G06720
Acepa_014615.p1	upregulated	AT2G16440
Acepa_100135.p1	upregulated	AT5G24080
Acepa_078304.p1	upregulated	AT4G19120
Acepa_058364.p1	upregulated	AT1G76680
Acepa_018511.p1	upregulated	AT5G18880
Acepa_067920.p1	upregulated	AT3G44220
Acepa_076304.p1	upregulated	-
Acepa_103428.p1	upregulated	AT3G29750
Acepa_043800.p1	upregulated	AT1G59960
Acepa_012496.p1	upregulated	AT5G04950
Acepa_025863.p1	upregulated	AT1G12240
Acepa_037245.p1	upregulated	AT1G62400
Acepa_042712.p1	upregulated	AT5G33320
Acepa_040645.p1	upregulated	-
Acepa_023010.p1	upregulated	AT4G37340
Acepa_016021.p1	upregulated	AT1G10550
Acepa_011101.p1	upregulated	AT5G12250
Acepa_033829.p1	upregulated	AT1G76680
Acepa_077838.p1	upregulated	AT3G47570
Acepa_010298.p1	upregulated	AT3G13080
Acepa_099157.p1	upregulated	AT5G33320
Acepa_069764.p1	upregulated	AT4G25830
Acepa_045692.p1	upregulated	AT1G64980
Acepa_020448.p1	upregulated	AT5G07440
Acepa_032435.p1	upregulated	AT5G20060
Acepa_040439.p1	upregulated	AT1G12240
Acepa_018642.p1	upregulated	AT3G59140
Acepa_088378.p1	upregulated	AT2G26520
Acepa_049543.p1	upregulated	AT4G13080
Acepa_073247.p1	upregulated	-
Acepa_041308.p1	upregulated	AT1G10070
Acepa_037727.p1	upregulated	AT3G21690
Acepa_060209.p1	upregulated	AT3G53810
Acepa_043100.p1	upregulated	AT5G54160
Acepa_060064.p1	upregulated	AT5G47020
Acepa_047840.p1	upregulated	AT3G48880
Acepa_042369.p1	upregulated	AT5G11880
Acepa_040971.p1	upregulated	AT2G25770
Acepa_049143.p1	upregulated	AT3G53620
Acepa_021400.p1	upregulated	AT5G09800
Acepa_012199.p1	upregulated	AT5G01320
Acepa_018770.p2	upregulated	-
Acepa_074228.p1	upregulated	-
Acepa_017102.p1	upregulated	AT5G17920
Acepa_004827.p1	upregulated	AT5G24330
Acepa_024766.p1	upregulated	AT1G62660
Acepa_035894.p2	upregulated	-
Acepa_028704.p1	upregulated	AT2G17120
Acepa_011338.p1	upregulated	AT4G31360
Acepa_038873.p1	upregulated	AT2G45290
Acepa_040846.p1	upregulated	AT5G17920
Acepa_076557.p1	upregulated	AT1G19180
Acepa_081108.p1	upregulated	AT5G28010
Acepa_029033.p1	upregulated	AT3G51000
Acepa_013188.p1	upregulated	AT1G45688
Acepa_041097.p1	upregulated	AT4G39330
Acepa_009357.p1	upregulated	-
Acepa_081789.p2	upregulated	-
Acepa_032866.p1	upregulated	AT5G15100
Acepa_037239.p4	upregulated	AT4G13710
Acepa_041060.p1	upregulated	AT1G62660
Acepa_017136.p1	upregulated	AT1G14870
Acepa_011925.p1	upregulated	AT4G14960
Acepa_029869.p1	upregulated	AT4G39640
Acepa_018794.p1	upregulated	-
Acepa_040109.p1	upregulated	AT4G39330
Acepa_012131.p1	upregulated	AT1G34040
Acepa_055393.p1	upregulated	AT3G07470
Acepa_065590.p2	upregulated	AT5G40690
Acepa_042710.p1	upregulated	AT1G08010
Acepa_095838.p1	upregulated	AT4G25810
Acepa_028859.p1	upregulated	AT5G51460
Acepa_050021.p1	upregulated	AT1G65610
Acepa_035820.p3	upregulated	AT1G21310
Acepa_036989.p1	upregulated	AT4G30210
Acepa_057019.p1	upregulated	AT1G49670
Acepa_075802.p1	upregulated	AT5G06860
Acepa_030071.p1	upregulated	AT2G29420
Acepa_034626.p3	upregulated	AT4G02330
Acepa_085073.p2	upregulated	AT1G15170
Acepa_005651.p1	upregulated	AT4G24715
Acepa_080246.p1	upregulated	AT5G47870
Acepa_025326.p2	upregulated	AT5G20820
Acepa_055132.p1	upregulated	AT5G54160
Acepa_010528.p1	upregulated	AT4G37360
Acepa_101257.p1	upregulated	AT1G65840
Acepa_037770.p2	upregulated	AT4G33070
Acepa_052399.p1	upregulated	AT5G63160
Acepa_092289.p1	upregulated	AT5G24080
Acepa_100196.p1	upregulated	AT5G42830
Acepa_039603.p1	upregulated	AT4G13940
Acepa_078047.p1	upregulated	AT4G39640
Acepa_075883.p1	upregulated	AT5G56960
Acepa_025062.p1	upregulated	AT4G39830
Acepa_007042.p1	upregulated	AT1G14390
Acepa_038962.p1	upregulated	AT3G54950
Acepa_053492.p1	upregulated	-
Acepa_005244.p1	upregulated	AT1G47230
Acepa_041085.p1	upregulated	AT1G68570
Acepa_079587.p1	upregulated	AT3G27640
Acepa_039110.p1	upregulated	AT5G59970
Acepa_020447.p1	upregulated	AT5G07440
Acepa_039421.p1	upregulated	AT5G12250
Acepa_040512.p2	upregulated	AT5G17920
Acepa_047793.p1	upregulated	AT4G13510
Acepa_035057.p1	upregulated	AT2G23180
Acepa_092895.p1	upregulated	AT5G47610
Acepa_035239.p1	upregulated	AT5G08020
Acepa_031376.p1	upregulated	-
Acepa_013944.p1	upregulated	AT4G13420
Acepa_079798.p1	upregulated	-
Acepa_040827.p1	upregulated	AT1G15150
Acepa_021159.p1	upregulated	AT2G28590
Acepa_040546.p1	upregulated	AT5G38260
Acepa_019503.p1	upregulated	AT1G62440
Acepa_092024.p1	upregulated	AT3G24420
Acepa_016391.p1	upregulated	AT1G32170
Acepa_054954.p1	upregulated	AT5G62700
Acepa_039118.p1	upregulated	AT5G64410
Acepa_093711.p1	upregulated	AT1G08230
Acepa_010724.p1	upregulated	AT1G02500
Acepa_010062.p1	upregulated	AT5G15740
Acepa_013140.p1	upregulated	AT5G04870
Acepa_079797.p2	upregulated	-
Acepa_040310.p1	upregulated	-
Acepa_042906.p1	upregulated	AT5G45280
Acepa_078307.p1	upregulated	AT4G19120
Acepa_099600.p1	upregulated	-
Acepa_013405.p1	upregulated	AT1G20970
Acepa_026182.p1	upregulated	AT2G15780
Acepa_070578.p2	upregulated	AT1G32100
Acepa_013638.p1	upregulated	AT1G56720
Acepa_039031.p2	upregulated	AT3G54700
Acepa_011615.p1	upregulated	AT5G06860
Acepa_040754.p1	upregulated	AT4G14960
Acepa_033011.p1	upregulated	AT5G61890
Acepa_010299.p1	upregulated	AT3G13080
Acepa_016962.p1	upregulated	AT3G21690
Acepa_100151.p1	upregulated	AT3G20390
Acepa_015609.p1	upregulated	AT3G22142
Acepa_000818.p1	upregulated	AT1G02205
Acepa_033775.p1	upregulated	AT5G49810
Acepa_097269.p1	upregulated	AT5G59870
Acepa_067374.p1	upregulated	AT1G56150
Acepa_035915.p1	upregulated	AT4G14960
Acepa_029540.p1	upregulated	AT2G36240
Acepa_054714.p1	upregulated	AT1G14290
Acepa_036579.p1	upregulated	AT1G33170
Acepa_066119.p1	upregulated	-
Acepa_025858.p1	upregulated	AT1G12240
Acepa_037519.p1	upregulated	AT4G21700
Acepa_039055.p1	upregulated	AT4G35630
Acepa_054300.p1	upregulated	AT4G32940
Acepa_067378.p1	upregulated	AT5G13330
Acepa_083263.p1	upregulated	AT3G23560
Acepa_007629.p1	upregulated	-
Acepa_050787.p1	upregulated	AT2G29570
Acepa_096323.p2	upregulated	-
Acepa_102141.p1	upregulated	AT2G45130
Acepa_011097.p1	upregulated	AT5G17920
Acepa_068746.p1	upregulated	AT3G20390
Acepa_075997.p1	upregulated	AT5G06060
Acepa_095421.p1	upregulated	AT3G54040
Acepa_082311.p1	upregulated	AT5G64950
Acepa_031646.p1	upregulated	AT4G11600
Acepa_006638.p1	upregulated	AT1G67070
Acepa_066513.p1	upregulated	AT3G11760
Acepa_100746.p1	upregulated	AT5G45280
Acepa_056000.p1	upregulated	AT4G35300
Acepa_022886.p1	upregulated	AT2G24490
Acepa_077523.p1	upregulated	AT2G23450
Acepa_006883.p1	upregulated	AT1G08080
Acepa_102252.p1	upregulated	AT5G05340
Acepa_010503.p1	upregulated	AT1G61290
Acepa_029315.p1	upregulated	AT3G16150
Acepa_042086.p1	upregulated	AT1G14290
Acepa_025133.p1	upregulated	AT4G23160
Acepa_041499.p1	upregulated	AT5G44635
Acepa_025620.p1	upregulated	AT3G54710
Acepa_071271.p1	upregulated	AT5G58090
Acepa_101258.p1	upregulated	AT1G65840
Acepa_098096.p1	upregulated	AT1G22840
Acepa_085162.p1	upregulated	AT3G45970
Acepa_097387.p1	upregulated	AT2G32300
Acepa_079799.p1	upregulated	AT2G20340
Acepa_073394.p1	upregulated	AT2G30620
Acepa_017478.p1	upregulated	AT5G48930
Acepa_009133.p1	upregulated	AT4G39490
Acepa_036266.p1	upregulated	AT3G57550
Acepa_019161.p1	upregulated	AT5G02290
Acepa_039316.p1	upregulated	AT5G54160
Acepa_036600.p1	upregulated	AT2G17230
Acepa_023834.p1	upregulated	AT5G12080
Acepa_102805.p1	upregulated	AT3G28580
Acepa_023433.p1	upregulated	AT1G21280
Acepa_084923.p1	upregulated	AT4G21700
Acepa_060689.p1	upregulated	AT1G69790
Acepa_028408.p1	upregulated	AT4G16260
Acepa_041216.p1	upregulated	AT3G05420
Acepa_099025.p1	upregulated	AT1G01480
Acepa_033914.p1	upregulated	AT1G65010
Acepa_101401.p1	upregulated	AT2G32300
Acepa_106623.p1	upregulated	-
Acepa_046699.p1	upregulated	AT4G37260
Acepa_028487.p1	upregulated	AT4G12730
Acepa_096322.p2	upregulated	-
Acepa_076396.p1	upregulated	AT4G23160
Acepa_096797.p1	upregulated	AT3G54320
Acepa_101477.p1	upregulated	AT1G35250
Acepa_035605.p1	upregulated	AT5G44640
Acepa_038507.p1	upregulated	AT1G76680
Acepa_069442.p1	upregulated	AT1G21280
Acepa_013754.p1	upregulated	AT1G08250
Acepa_042646.p1	upregulated	AT4G13940
Acepa_042117.p1	upregulated	AT3G21240
Acepa_049628.p1	upregulated	AT3G22460
Acepa_033033.p2	upregulated	ATMG01250
Acepa_040524.p1	upregulated	AT1G76680
Acepa_010489.p1	upregulated	AT5G03300
Acepa_027403.p1	upregulated	AT5G04370
Acepa_096236.p1	upregulated	AT2G40890
Acepa_039610.p1	upregulated	AT2G37040
Acepa_049349.p1	upregulated	AT1G04040
Acepa_043774.p1	upregulated	AT4G18700
Acepa_005626.p1	upregulated	AT5G07220
Acepa_041944.p1	upregulated	-
Acepa_038350.p1	upregulated	AT2G01050
Acepa_036362.p1	upregulated	-
Acepa_038694.p1	upregulated	AT3G45980
Acepa_025166.p1	upregulated	AT5G08020
Acepa_035890.p1	upregulated	AT4G19020
Acepa_012341.p1	upregulated	AT2G35060
Acepa_074489.p1	upregulated	AT3G59220
Acepa_017117.p1	upregulated	AT5G61820
Acepa_068557.p1	upregulated	AT3G06890
Acepa_023812.p1	upregulated	AT2G33330
Acepa_040669.p1	upregulated	AT4G26200
Acepa_048974.p1	upregulated	AT2G48020
Acepa_006884.p1	upregulated	AT1G08080
Acepa_013622.p1	upregulated	AT1G65840
Acepa_045622.p1	upregulated	AT4G16260
Acepa_028244.p1	upregulated	AT1G51090
Acepa_016961.p1	upregulated	AT3G21690
Acepa_101911.p1	upregulated	AT4G24520
Acepa_074141.p1	upregulated	AT5G62700
Acepa_037710.p1	upregulated	AT1G49670
Acepa_074227.p1	upregulated	-
Acepa_070640.p1	upregulated	AT3G04720
Acepa_023991.p1	upregulated	AT5G06860
Acepa_019607.p1	upregulated	AT1G74030
Acepa_101343.p1	upregulated	AT3G20390
Acepa_033203.p1	upregulated	AT5G07480
Acepa_018036.p1	upregulated	AT4G20170
Acepa_023007.p1	upregulated	AT5G06390
Acepa_074409.p1	upregulated	-
Acepa_025860.p1	upregulated	AT1G12240
Acepa_066241.p1	upregulated	AT1G51090
Acepa_017834.p1	upregulated	AT1G56580
Acepa_073395.p1	upregulated	AT2G30620
Acepa_076056.p1	upregulated	AT2G25770
Acepa_099663.p1	upregulated	AT3G21865
Acepa_046091.p1	upregulated	AT1G32450
Acepa_015386.p1	upregulated	AT1G78240
Acepa_029439.p1	upregulated	AT1G07180
Acepa_018023.p1	upregulated	AT3G18180
Acepa_011466.p1	upregulated	AT5G62100
Acepa_052395.p1	upregulated	-
Acepa_006407.p1	upregulated	AT5G19380
Acepa_038562.p1	upregulated	AT4G00730
Acepa_016963.p1	upregulated	AT3G21690
Acepa_006520.p1	upregulated	AT5G59870
Acepa_054376.p1	upregulated	AT4G34660
Acepa_049658.p1	upregulated	AT4G27720
Acepa_055294.p1	upregulated	AT5G45280
Acepa_067305.p1	upregulated	AT5G22650
Acepa_008859.p1	upregulated	AT5G10770
Acepa_029028.p1	upregulated	AT4G11290
Acepa_015275.p1	upregulated	AT4G35300
Acepa_012934.p1	upregulated	AT2G30490
Acepa_022891.p1	upregulated	AT5G38700
Acepa_011597.p1	upregulated	AT3G07320
Acepa_097943.p1	upregulated	-
Acepa_094856.p1	upregulated	AT5G42860
Acepa_038119.p1	upregulated	AT2G22250
Acepa_023160.p1	upregulated	AT3G53190
Acepa_005530.p1	upregulated	AT1G06620
Acepa_036011.p1	upregulated	AT2G39050
Acepa_043239.p1	upregulated	AT5G12380
Acepa_027774.p1	upregulated	AT1G56670
Acepa_010697.p2	upregulated	-
Acepa_094602.p1	upregulated	AT3G06240
Acepa_101446.p1	upregulated	AT1G15950
Acepa_103036.p1	upregulated	AT3G02100
Acepa_025707.p1	upregulated	AT2G25940
Acepa_079567.p1	upregulated	AT2G27660
Acepa_027843.p1	upregulated	AT5G06860
Acepa_027759.p1	upregulated	AT5G50760
Acepa_102253.p1	upregulated	AT5G05340
Acepa_044353.p2	upregulated	AT5G05365
Acepa_041543.p2	upregulated	-
Acepa_035947.p2	upregulated	AT2G13610
Acepa_021367.p1	upregulated	AT2G41880
Acepa_073663.p1	upregulated	AT1G44100
Acepa_045319.p1	upregulated	AT3G49720
Acepa_040836.p1	upregulated	AT2G44610
Acepa_094344.p1	upregulated	AT2G22250
Acepa_098102.p1	upregulated	AT5G42170
Acepa_050631.p1	upregulated	AT5G05340
Acepa_026482.p1	upregulated	AT3G52990
Acepa_022483.p1	upregulated	AT4G14960
Acepa_034089.p1	upregulated	AT4G32300
Acepa_039439.p1	upregulated	-
Acepa_030499.p1	upregulated	AT2G22880
Acepa_085163.p1	upregulated	AT5G67020
Acepa_081169.p1	upregulated	AT3G28580
Acepa_040162.p1	upregulated	AT1G07270
Acepa_057745.p1	upregulated	AT3G05420
Acepa_079483.p1	upregulated	AT4G30420
Acepa_012118.p1	upregulated	AT5G48930
Acepa_045526.p1	upregulated	AT1G09540
Acepa_021138.p1	upregulated	AT1G33170
Acepa_031114.p1	upregulated	AT1G21070
Acepa_014661.p1	upregulated	AT4G02800
Acepa_036139.p1	upregulated	AT2G32300
Acepa_026809.p1	upregulated	AT3G26310
Acepa_018263.p1	upregulated	AT2G32530
Acepa_078123.p1	upregulated	AT1G74030
Acepa_067617.p1	upregulated	AT1G43160
Acepa_010135.p1	upregulated	AT3G21865
Acepa_083670.p1	upregulated	AT5G48930
Acepa_046483.p1	upregulated	AT5G64810
Acepa_033098.p1	upregulated	AT4G20520
Acepa_035163.p1	upregulated	AT4G14960
Acepa_025114.p1	upregulated	AT5G10840
Acepa_037421.p1	upregulated	AT1G22840
Acepa_075207.p1	upregulated	AT1G16390
Acepa_012797.p1	upregulated	AT5G66280
Acepa_027842.p1	upregulated	AT5G06860
Acepa_010617.p1	upregulated	AT2G45130
Acepa_095045.p1	upregulated	AT4G25830
Acepa_096603.p1	upregulated	AT1G32100
Acepa_020653.p1	upregulated	AT3G30180
Acepa_027402.p1	upregulated	AT5G04370
Acepa_014214.p1	upregulated	AT5G08640
Acepa_025670.p1	upregulated	AT1G30510
Acepa_037599.p1	upregulated	AT2G33380
Acepa_079043.p1	upregulated	AT5G06860
Acepa_036655.p1	upregulated	AT1G12240
Acepa_015296.p1	upregulated	AT4G16970
Acepa_018401.p1	upregulated	AT5G18520
Acepa_039869.p3	upregulated	AT1G21310
Acepa_059802.p1	upregulated	AT5G60900
Acepa_077760.p1	upregulated	AT1G53820
Acepa_015129.p1	upregulated	AT2G45300
Acepa_025403.p1	upregulated	AT1G15690
Acepa_026145.p2	upregulated	AT1G01490
Acepa_042470.p2	upregulated	AT1G12240
Acepa_018640.p1	upregulated	AT3G59140
Acepa_046390.p1	upregulated	AT1G48590
Acepa_078465.p1	upregulated	AT1G58420
Acepa_032087.p2	upregulated	AT2G27510
Acepa_007011.p1	upregulated	AT1G56580
Acepa_017135.p1	upregulated	AT1G14870
Acepa_029694.p1	upregulated	AT1G76690
Acepa_027404.p1	upregulated	AT1G19640
Acepa_101395.p1	upregulated	AT3G21810
Acepa_038174.p2	upregulated	AT1G76680
Acepa_058420.p1	upregulated	AT3G02800
Acepa_028245.p1	upregulated	AT1G49670
Acepa_032973.p1	upregulated	AT3G14240
Acepa_073563.p1	upregulated	AT1G35710
Acepa_082722.p1	upregulated	AT4G19390
Acepa_100419.p1	downregulated	AT2G25770
Acepa_081445.p3	downregulated	AT2G25940
Acepa_031970.p1	downregulated	AT5G50360
Acepa_018889.p1	downregulated	AT3G16360
Acepa_057803.p2	downregulated	-
Acepa_034723.p1	downregulated	AT4G03510
Acepa_015266.p1	downregulated	AT5G25560
Acepa_079964.p1	downregulated	-
Acepa_017948.p1	downregulated	AT4G23160
Acepa_099111.p1	downregulated	AT4G32480
Acepa_107844.p1	downregulated	AT1G76650
Acepa_009471.p1	downregulated	-
Acepa_097918.p1	downregulated	AT1G65390
Acepa_054188.p1	downregulated	AT5G54190
Acepa_010653.p1	downregulated	AT1G76490
Acepa_078330.p1	downregulated	AT3G13750
Acepa_038221.p1	downregulated	AT4G27670
Acepa_061092.p1	downregulated	-
Acepa_021584.p1	downregulated	AT4G28250
Acepa_042332.p1	downregulated	AT4G19170
Acepa_097198.p1	downregulated	AT1G19660
Acepa_055462.p1	downregulated	ATMG00820
Acepa_016563.p1	downregulated	AT1G65390
Acepa_048794.p1	downregulated	AT1G64780
Acepa_036797.p1	downregulated	AT5G04040
Acepa_033904.p1	downregulated	AT3G06880
Acepa_097780.p1	downregulated	AT1G59720
Acepa_051872.p1	downregulated	AT1G02640
Acepa_048482.p1	downregulated	AT2G29990
Acepa_049012.p2	downregulated	AT5G02020
Acepa_014715.p1	downregulated	AT4G34120
Acepa_013294.p1	downregulated	-
Acepa_081323.p1	downregulated	-
Acepa_076034.p1	downregulated	AT3G11180
Acepa_066388.p1	downregulated	-
Acepa_014745.p1	downregulated	-
Acepa_096226.p1	downregulated	AT2G03760
Acepa_076752.p1	downregulated	AT4G31290
Acepa_100864.p1	downregulated	AT3G16360
Acepa_023474.p1	downregulated	AT5G40670
Acepa_047040.p1	downregulated	AT2G37080
Acepa_083817.p1	downregulated	AT5G22920
Acepa_069608.p1	downregulated	AT5G13730
Acepa_045919.p1	downregulated	-
Acepa_101296.p1	downregulated	-
Acepa_061091.p1	downregulated	-
Acepa_004219.p1	downregulated	AT1G78160
Acepa_056773.p1	downregulated	AT5G46050
Acepa_033858.p1	downregulated	AT5G46050
Acepa_102812.p1	downregulated	AT5G56550
Acepa_024151.p1	downregulated	AT4G19850
Acepa_009059.p1	downregulated	AT1G64720
Acepa_048481.p1	downregulated	AT2G29990
Acepa_024812.p1	downregulated	AT2G39700
Acepa_016124.p2	downregulated	AT5G07470
Acepa_096320.p1	downregulated	AT5G63470
Acepa_101673.p1	downregulated	AT4G37300
Acepa_038062.p1	downregulated	AT5G11550
Acepa_013951.p1	downregulated	AT5G53390
Acepa_023395.p1	downregulated	AT5G54190
Acepa_056730.p1	downregulated	AT5G09220
Acepa_094276.p1	downregulated	AT1G79040
Acepa_071904.p1	downregulated	AT4G37300
Acepa_025877.p1	downregulated	AT3G24255
Acepa_035880.p1	downregulated	AT3G13750
Acepa_009104.p1	downregulated	AT5G49730
Acepa_100309.p1	downregulated	AT5G44640
Acepa_015427.p1	downregulated	-
Acepa_083818.p1	downregulated	AT5G22920
Acepa_036149.p1	downregulated	AT4G35160
Acepa_103683.p1	downregulated	ATMG01250
Acepa_044206.p1	downregulated	AT3G07350
Acepa_080565.p1	downregulated	AT1G12240
Acepa_014079.p2	downregulated	AT2G15890
Acepa_057408.p1	downregulated	AT1G79040
Acepa_102215.p1	downregulated	AT5G13630
Acepa_095386.p1	downregulated	AT4G35160
Acepa_010328.p1	downregulated	AT3G02555
Acepa_018668.p1	downregulated	AT2G35130
Acepa_036392.p1	downregulated	AT5G13630
Acepa_009700.p1	downregulated	AT5G44680
Acepa_078838.p1	downregulated	AT4G19850
Acepa_078239.p1	downregulated	AT1G62660
Acepa_014254.p2	downregulated	AT1G75540
Acepa_025735.p1	downregulated	AT2G48030
Acepa_083590.p1	downregulated	AT2G16050
Acepa_029805.p1	downregulated	AT4G13540
Acepa_013520.p1	downregulated	AT1G75950
Acepa_020504.p1	downregulated	AT3G24255
Acepa_046494.p1	downregulated	AT4G16830
Acepa_067216.p1	downregulated	AT4G00895
Acepa_081324.p1	downregulated	-
Acepa_036196.p1	downregulated	AT5G37260
Acepa_020798.p1	downregulated	-
Acepa_018890.p1	downregulated	AT3G16360
Acepa_036934.p1	downregulated	AT1G30100
Acepa_013214.p1	downregulated	AT4G29210
Acepa_011826.p1	downregulated	AT5G20950
Acepa_014592.p1	downregulated	AT4G12690
Acepa_043074.p1	downregulated	AT1G49010
Acepa_010302.p1	downregulated	AT1G79040
Acepa_075702.p2	downregulated	AT5G49360
Acepa_016125.p1	downregulated	AT5G07470
Acepa_061353.p1	downregulated	AT4G23160
Acepa_021066.p1	downregulated	AT3G16360
Acepa_069973.p1	downregulated	-
Acepa_069025.p1	downregulated	AT5G57685
Acepa_041259.p1	downregulated	AT1G23870
Acepa_069353.p1	downregulated	AT4G18740
Acepa_011644.p1	downregulated	AT5G03860
Acepa_046496.p1	downregulated	AT4G16830
Acepa_014713.p1	downregulated	-
Acepa_048488.p1	downregulated	AT2G29990
Acepa_017495.p1	downregulated	AT5G13200
Acepa_030875.p1	downregulated	AT3G15680
Acepa_037372.p1	downregulated	AT5G04040
Acepa_009037.p2	downregulated	AT1G62660
Acepa_014714.p1	downregulated	-
Acepa_100650.p1	downregulated	-
Acepa_067568.p1	downregulated	AT3G10910
Acepa_056728.p1	downregulated	AT5G09220
Acepa_066527.p1	downregulated	AT3G24450
Acepa_103396.p1	downregulated	AT1G62660
Acepa_044845.p1	downregulated	AT1G65480
Acepa_009866.p1	downregulated	-
Acepa_027584.p1	downregulated	AT4G30190
Acepa_019968.p1	downregulated	AT1G60590
Acepa_078278.p1	downregulated	AT5G21930
Acepa_069352.p1	downregulated	AT4G18740
Acepa_009698.p1	downregulated	AT5G44680
Acepa_035482.p1	downregulated	AT3G29240
Acepa_041081.p1	downregulated	AT2G34430
Acepa_048485.p1	downregulated	AT2G29990
Acepa_019265.p1	downregulated	ATMG00300
Acepa_011692.p1	downregulated	ATMG00850
Acepa_096940.p1	downregulated	AT2G37730
Acepa_025734.p1	downregulated	AT2G48030
Acepa_023558.p1	downregulated	AT2G46790
Acepa_018891.p1	downregulated	AT3G16360
Acepa_031995.p1	downregulated	AT4G19850
Acepa_088125.p2	downregulated	AT4G39730
Acepa_031126.p1	downregulated	AT4G21970
Acepa_012938.p1	downregulated	AT2G02950
Acepa_066641.p1	downregulated	AT4G10850
Acepa_011936.p2	downregulated	AT4G35150
Acepa_082637.p1	downregulated	AT4G31850
Acepa_059265.p1	downregulated	AT5G06580
Acepa_101158.p1	downregulated	AT3G24255
Acepa_016676.p1	downregulated	AT1G15740
Acepa_079988.p1	downregulated	AT2G39130
Acepa_013949.p1	downregulated	AT5G53390
Acepa_102413.p1	downregulated	AT3G13750
Acepa_014255.p1	downregulated	AT1G75540
Acepa_041816.p2	downregulated	AT5G17300
Acepa_019838.p1	downregulated	AT1G02640
Acepa_014625.p1	downregulated	AT3G53700
Acepa_013782.p1	downregulated	AT1G69530
Acepa_084238.p1	downregulated	AT5G15250
Acepa_010651.p1	downregulated	AT1G76490
Acepa_022290.p1	downregulated	AT1G01320
Acepa_081444.p1	downregulated	AT4G32940
Acepa_099752.p1	downregulated	AT1G29930
Acepa_014109.p1	downregulated	AT2G34140
Acepa_006824.p1	downregulated	AT3G47800
Acepa_019961.p2	downregulated	AT1G10640
Acepa_075222.p2	downregulated	-
Acepa_053853.p1	downregulated	-
Acepa_013947.p1	downregulated	AT5G53390
Acepa_085297.p1	downregulated	AT4G35160
Acepa_014712.p1	downregulated	-
Acepa_011624.p1	downregulated	AT3G13750
Acepa_097519.p1	downregulated	AT4G30490
Acepa_036342.p1	downregulated	AT5G25560
Acepa_017855.p1	downregulated	AT1G18620
Acepa_050548.p1	downregulated	AT4G23160
Acepa_047354.p1	downregulated	AT3G07340
Acepa_020690.p1	downregulated	AT1G29500
Acepa_047853.p1	downregulated	AT5G21222
Acepa_078234.p1	downregulated	AT1G62660
Acepa_057134.p1	downregulated	AT1G14150
Acepa_041123.p1	downregulated	AT1G12240
Acepa_019492.p1	downregulated	ATMG01250
Acepa_051860.p1	downregulated	AT1G14700
Acepa_032261.p2	downregulated	AT1G71000
Acepa_005663.p1	downregulated	AT5G40670
Acepa_079259.p1	downregulated	AT4G28070
Acepa_020132.p1	downregulated	AT2G31980
Acepa_023259.p1	downregulated	AT5G46940
Acepa_014681.p1	downregulated	AT1G56220
Acepa_022793.p1	downregulated	AT5G37260
Acepa_018208.p1	downregulated	-
Acepa_009472.p1	downregulated	-
Acepa_078951.p1	downregulated	AT1G19660
Acepa_011937.p2	downregulated	AT4G35150
Acepa_034968.p1	downregulated	AT5G49730
Acepa_029355.p1	downregulated	AT5G25190
Acepa_009701.p1	downregulated	AT5G44680
Acepa_069974.p1	downregulated	-
Acepa_072680.p1	downregulated	AT5G38510
Acepa_018282.p1	downregulated	AT1G71691
Acepa_075204.p1	downregulated	AT5G64530
Acepa_033807.p1	downregulated	AT4G32940
Acepa_053113.p1	downregulated	AT5G63470
Acepa_010654.p1	downregulated	AT1G76490
Acepa_077985.p1	downregulated	AT5G10180
Acepa_071039.p1	downregulated	AT3G24760
Acepa_010676.p1	downregulated	AT3G13750
Acepa_085290.p1	downregulated	AT4G35160
Acepa_012820.p1	downregulated	AT1G72180
Acepa_074888.p1	downregulated	AT1G14150
Acepa_005733.p1	downregulated	AT4G36850
Acepa_045474.p1	downregulated	AT1G51080
Acepa_077122.p1	downregulated	-
Acepa_031343.p1	downregulated	AT1G51550
Acepa_017324.p1	downregulated	AT4G20520
Acepa_020741.p1	downregulated	-
Acepa_084027.p1	downregulated	AT3G56200
Acepa_018806.p1	downregulated	AT2G40610
Acepa_028604.p1	downregulated	AT4G19170
Acepa_096511.p1	downregulated	AT2G42620
Acepa_049088.p1	downregulated	AT1G74470
Acepa_079990.p1	downregulated	AT2G39130
Acepa_104475.p1	downregulated	AT5G49740
Acepa_084357.p1	downregulated	-
Acepa_021297.p1	downregulated	-
Acepa_065463.p1	downregulated	AT3G02885
Acepa_040756.p1	downregulated	-
Acepa_059263.p1	downregulated	AT5G06560
Acepa_028272.p1	downregulated	AT5G57030
Acepa_066651.p1	downregulated	AT1G47580
Acepa_100304.p1	downregulated	AT5G44640
Acepa_077124.p1	downregulated	-
Acepa_059426.p1	downregulated	AT1G17870
Acepa_081006.p1	downregulated	AT1G29450
Acepa_085991.p1	downregulated	AT5G49740
Acepa_049944.p1	downregulated	AT1G15740
Acepa_046456.p1	downregulated	AT2G16050
Acepa_042955.p1	downregulated	AT1G36370
Acepa_014680.p1	downregulated	AT1G56220
Acepa_040419.p1	downregulated	AT5G13630
Acepa_046230.p1	downregulated	AT2G37730
Acepa_079731.p1	downregulated	AT3G54890
Acepa_004992.p1	downregulated	AT4G37300
Acepa_015153.p1	downregulated	AT5G18290
Acepa_026733.p1	downregulated	AT5G03390
Acepa_104009.p1	downregulated	AT5G22920
Acepa_095250.p1	downregulated	AT5G14370
Acepa_100627.p1	downregulated	-
Acepa_077369.p1	downregulated	AT2G44480
Acepa_100625.p2	downregulated	AT4G21215
Acepa_051873.p2	downregulated	AT1G02640
Acepa_075922.p1	downregulated	AT2G29990
Acepa_079965.p1	downregulated	AT5G06580
Acepa_032020.p1	downregulated	-
Acepa_041148.p1	downregulated	-
Acepa_010678.p1	downregulated	AT3G13750
Acepa_037128.p1	downregulated	AT1G15740
Acepa_012929.p1	downregulated	AT4G13710
Acepa_012320.p2	downregulated	AT3G57050
Acepa_029097.p1	downregulated	AT3G25730
Acepa_045399.p1	downregulated	AT5G66440
Acepa_073925.p1	downregulated	AT5G21222
Acepa_076184.p1	downregulated	AT2G25770
Acepa_075380.p2	downregulated	AT3G11410
Acepa_020739.p1	downregulated	-
Acepa_047823.p1	downregulated	AT4G36040
Acepa_019236.p1	downregulated	AT1G27680
Acepa_097915.p1	downregulated	AT1G65390
Acepa_019964.p1	downregulated	AT1G60590
Acepa_048201.p1	downregulated	-
Acepa_107757.p2	downregulated	-
Acepa_005643.p1	downregulated	AT5G38510
Acepa_015951.p1	downregulated	AT1G12240
Acepa_012925.p1	downregulated	-
Acepa_099262.p1	downregulated	AT2G28305
Acepa_027006.p1	downregulated	AT3G16720
Acepa_061180.p1	downregulated	AT4G35160
Acepa_037280.p1	downregulated	AT5G07470
Acepa_100424.p1	downregulated	AT3G52990
Acepa_041130.p1	downregulated	AT5G46050
Acepa_011124.p2	downregulated	AT5G42260
Acepa_050617.p1	downregulated	AT5G58770
Acepa_010667.p1	downregulated	AT4G27670
Acepa_032262.p1	downregulated	AT1G71000
Acepa_076753.p1	downregulated	AT4G31290
Acepa_074596.p1	downregulated	AT3G17470
Acepa_005737.p1	downregulated	AT3G14790
Acepa_013435.p1	downregulated	AT3G26740
Acepa_023361.p1	downregulated	AT3G62390
Acepa_041729.p1	downregulated	AT3G13750
Acepa_038017.p1	downregulated	AT3G13750
Acepa_007721.p1	downregulated	AT3G13750
Acepa_093083.p1	downregulated	-
Acepa_061182.p1	downregulated	AT4G35160
Acepa_100385.p1	downregulated	AT4G33010
Acepa_084967.p1	downregulated	AT1G60070
Acepa_047249.p1	downregulated	AT5G59560
Acepa_016370.p1	downregulated	AT3G50330
Acepa_100626.p1	downregulated	-
Acepa_058436.p1	downregulated	-

## Sheet: Asia-24 0 hpi vs 24 hpi
Gene ID	DE results	TAIR ID			GO annotatied transcripts
Acepa_039132.p1	upregulated	AT1G55020			Response to stress	Response to biotic stimulus
Acepa_100907.p1	upregulated	AT4G05020		Upregulated transcripts	63	31
Acepa_097305.p1	upregulated	AT2G32530		Downregulated transcripts	22	10
Acepa_084675.p1	upregulated	AT3G45010
Acepa_060679.p1	upregulated	AT3G21420
Acepa_100990.p1	upregulated	AT1G77330
Acepa_000089.p1	upregulated	AT4G28310
Acepa_039143.p1	upregulated	AT4G20520
Acepa_103602.p1	upregulated	AT3G19000
Acepa_084092.p1	upregulated	AT1G79560
Acepa_053525.p1	upregulated	AT1G64660
Acepa_032882.p1	upregulated	AT2G32300
Acepa_038053.p1	upregulated	AT2G40550
Acepa_040417.p1	upregulated	AT4G20520
Acepa_099683.p1	upregulated	AT2G46960
Acepa_023007.p1	upregulated	AT5G06390
Acepa_037094.p1	upregulated	ATMG01250
Acepa_048973.p1	upregulated	AT1G54970
Acepa_019163.p1	upregulated	AT5G02290
Acepa_095657.p1	upregulated	AT1G14290
Acepa_055868.p2	upregulated	AT3G26300
Acepa_029786.p1	upregulated	AT1G17840
Acepa_059302.p1	upregulated	-
Acepa_047525.p1	upregulated	AT3G02580
Acepa_041753.p1	upregulated	AT5G41880
Acepa_015947.p1	upregulated	AT3G22600
Acepa_097139.p1	upregulated	AT1G68280
Acepa_045682.p1	upregulated	AT2G15490
Acepa_047904.p1	upregulated	AT3G23560
Acepa_074928.p2	upregulated	AT1G10070
Acepa_024279.p1	upregulated	AT5G54160
Acepa_034088.p1	upregulated	AT4G39490
Acepa_087182.p1	upregulated	AT5G19040
Acepa_070293.p1	upregulated	AT3G63540
Acepa_043078.p1	upregulated	AT1G55020
Acepa_001350.p1	upregulated	-
Acepa_053056.p1	upregulated	AT1G78290
Acepa_034936.p1	upregulated	AT5G07990
Acepa_068770.p1	upregulated	AT2G41480
Acepa_053526.p1	upregulated	AT1G64660
Acepa_032176.p1	upregulated	AT1G05010
Acepa_081618.p1	upregulated	AT2G47140
Acepa_018210.p1	upregulated	-
Acepa_022180.p1	upregulated	-
Acepa_006393.p1	upregulated	AT1G76690
Acepa_019162.p1	upregulated	AT4G35600
Acepa_037350.p1	upregulated	AT5G13750
Acepa_030319.p2	upregulated	-
Acepa_040796.p1	upregulated	AT4G20520
Acepa_048453.p1	upregulated	-
Acepa_100849.p1	upregulated	AT5G03300
Acepa_031801.p1	upregulated	AT2G36800
Acepa_059450.p1	upregulated	-
Acepa_057387.p1	upregulated	AT1G75780
Acepa_041691.p1	upregulated	AT2G20340
Acepa_096445.p1	upregulated	-
Acepa_095656.p1	upregulated	AT1G14290
Acepa_031571.p1	upregulated	AT3G45140
Acepa_053092.p1	upregulated	AT2G20340
Acepa_051728.p1	upregulated	AT5G65780
Acepa_104418.p1	upregulated	AT3G45140
Acepa_072204.p1	upregulated	AT3G23250
Acepa_029045.p2	upregulated	AT3G51590
Acepa_014805.p1	upregulated	-
Acepa_023652.p1	upregulated	-
Acepa_034888.p1	upregulated	AT5G23660
Acepa_025178.p1	upregulated	AT5G50200
Acepa_039496.p2	upregulated	AT1G21310
Acepa_006285.p1	upregulated	AT1G48100
Acepa_055869.p1	upregulated	AT3G48270
Acepa_077173.p1	upregulated	AT2G33380
Acepa_072610.p1	upregulated	AT1G56430
Acepa_051999.p1	upregulated	-
Acepa_014448.p1	upregulated	AT1G08250
Acepa_035197.p1	upregulated	AT4G39490
Acepa_071727.p1	upregulated	AT5G06720
Acepa_039519.p1	upregulated	AT5G23420
Acepa_012744.p1	upregulated	AT1G64660
Acepa_032326.p1	upregulated	-
Acepa_050406.p1	upregulated	AT3G47570
Acepa_034637.p1	upregulated	AT1G55020
Acepa_035459.p1	upregulated	AT1G62660
Acepa_092483.p1	upregulated	AT2G32300
Acepa_021821.p1	upregulated	-
Acepa_072924.p1	upregulated	AT1G22360
Acepa_053608.p1	upregulated	AT1G68750
Acepa_028555.p1	upregulated	AT3G48310
Acepa_024277.p1	upregulated	AT5G54160
Acepa_035966.p1	upregulated	AT5G47720
Acepa_038166.p2	upregulated	AT3G50660
Acepa_024138.p1	upregulated	AT2G46630
Acepa_036954.p1	upregulated	AT3G42170
Acepa_031267.p1	upregulated	AT1G24540
Acepa_046270.p1	upregulated	-
Acepa_034223.p1	upregulated	AT1G76680
Acepa_025863.p1	upregulated	AT1G12240
Acepa_075998.p1	upregulated	AT5G06060
Acepa_058195.p1	upregulated	AT2G47140
Acepa_014662.p1	upregulated	AT4G02800
Acepa_023644.p2	upregulated	-
Acepa_016030.p1	upregulated	AT1G77380
Acepa_094069.p1	upregulated	AT3G19630
Acepa_025860.p1	upregulated	AT1G12240
Acepa_035195.p2	upregulated	AT3G11080
Acepa_023010.p1	upregulated	AT4G37340
Acepa_098352.p1	upregulated	AT1G79620
Acepa_018544.p1	upregulated	AT2G40330
Acepa_019780.p1	upregulated	-
Acepa_029145.p1	upregulated	AT5G05340
Acepa_096746.p1	upregulated	AT5G28010
Acepa_035567.p1	upregulated	AT1G76680
Acepa_056073.p1	upregulated	AT5G06860
Acepa_047072.p1	upregulated	-
Acepa_069061.p1	upregulated	AT1G15550
Acepa_003896.p1	upregulated	AT5G61910
Acepa_021905.p1	upregulated	AT5G48050
Acepa_046671.p1	upregulated	AT3G20015
Acepa_040591.p1	upregulated	AT1G55020
Acepa_068481.p1	upregulated	AT2G18969
Acepa_026809.p1	upregulated	AT3G26310
Acepa_055961.p1	upregulated	AT1G76810
Acepa_020482.p1	upregulated	AT2G45600
Acepa_040229.p2	upregulated	AT1G02205
Acepa_058453.p1	upregulated	AT5G65380
Acepa_035778.p1	upregulated	AT2G32530
Acepa_036160.p1	upregulated	AT1G12240
Acepa_083120.p1	upregulated	AT1G34060
Acepa_037223.p1	upregulated	AT1G02205
Acepa_085073.p2	upregulated	AT1G15170
Acepa_054300.p1	upregulated	AT4G32940
Acepa_081170.p1	upregulated	AT3G28580
Acepa_042327.p1	upregulated	AT5G47870
Acepa_076061.p1	upregulated	AT1G49670
Acepa_011332.p1	upregulated	AT3G18000
Acepa_053577.p1	upregulated	AT5G04370
Acepa_066119.p1	upregulated	-
Acepa_033078.p1	upregulated	-
Acepa_068769.p1	upregulated	AT2G41480
Acepa_042132.p1	upregulated	AT1G55020
Acepa_101006.p1	upregulated	AT3G51590
Acepa_037764.p1	upregulated	AT1G12240
Acepa_020651.p1	upregulated	AT3G30180
Acepa_076761.p3	upregulated	AT3G15470
Acepa_059810.p1	upregulated	-
Acepa_032065.p1	upregulated	AT1G70680
Acepa_100906.p1	upregulated	AT4G05020
Acepa_069840.p2	upregulated	AT1G11700
Acepa_012674.p1	upregulated	AT1G54730
Acepa_076975.p1	upregulated	AT4G00430
Acepa_018970.p1	upregulated	AT4G01870
Acepa_092112.p1	upregulated	-
Acepa_038741.p1	upregulated	AT3G26990
Acepa_054963.p1	upregulated	-
Acepa_016598.p1	upregulated	AT3G17470
Acepa_081178.p1	upregulated	AT5G50200
Acepa_019614.p1	upregulated	AT1G72970
Acepa_018380.p1	upregulated	-
Acepa_040971.p1	upregulated	AT2G25770
Acepa_032727.p1	upregulated	-
Acepa_061945.p1	upregulated	-
Acepa_036374.p1	upregulated	AT3G24255
Acepa_025707.p1	upregulated	AT2G25940
Acepa_020554.p1	upregulated	AT1G20960
Acepa_053090.p1	upregulated	AT2G20340
Acepa_082311.p1	upregulated	AT5G64950
Acepa_020653.p1	upregulated	AT3G30180
Acepa_030812.p1	upregulated	-
Acepa_043064.p1	upregulated	AT4G36020
Acepa_037451.p1	upregulated	AT1G12240
Acepa_031059.p1	upregulated	AT3G14420
Acepa_005650.p1	upregulated	AT5G50200
Acepa_074409.p1	upregulated	-
Acepa_009078.p1	upregulated	AT5G28840
Acepa_052393.p1	upregulated	AT3G48360
Acepa_069661.p1	upregulated	-
Acepa_044353.p2	upregulated	AT5G05365
Acepa_011331.p1	upregulated	AT3G18000
Acepa_034949.p1	upregulated	AT1G22400
Acepa_032881.p1	upregulated	AT3G24255
Acepa_012497.p1	upregulated	AT1G56430
Acepa_056931.p1	upregulated	AT5G56530
Acepa_036655.p1	upregulated	AT1G12240
Acepa_029793.p2	upregulated	AT4G15020
Acepa_077180.p1	upregulated	AT2G33380
Acepa_034684.p1	upregulated	AT2G30490
Acepa_057965.p1	upregulated	-
Acepa_030500.p1	upregulated	AT2G22880
Acepa_071566.p1	upregulated	AT4G28310
Acepa_040781.p1	upregulated	AT3G18170
Acepa_028605.p1	upregulated	AT1G48280
Acepa_014806.p1	upregulated	-
Acepa_059588.p1	upregulated	AT5G12470
Acepa_098329.p1	upregulated	AT5G67310
Acepa_029203.p1	upregulated	AT3G29670
Acepa_018511.p1	upregulated	AT5G18880
Acepa_008817.p1	upregulated	AT1G55020
Acepa_043800.p1	upregulated	AT1G59960
Acepa_012496.p1	upregulated	AT5G04950
Acepa_016753.p1	upregulated	AT2G23610
Acepa_039217.p1	upregulated	AT3G16520
Acepa_042503.p1	upregulated	AT2G37790
Acepa_051998.p1	upregulated	AT2G01050
Acepa_030071.p1	upregulated	AT2G29420
Acepa_033050.p1	upregulated	-
Acepa_025794.p1	upregulated	AT3G02580
Acepa_033829.p1	upregulated	AT1G76680
Acepa_077838.p1	upregulated	AT3G47570
Acepa_069764.p1	upregulated	AT4G25830
Acepa_032435.p1	upregulated	AT5G20060
Acepa_007251.p1	upregulated	AT1G23480
Acepa_040439.p1	upregulated	AT1G12240
Acepa_073247.p1	upregulated	-
Acepa_041308.p1	upregulated	AT1G10070
Acepa_060064.p1	upregulated	AT5G47020
Acepa_008818.p1	upregulated	AT1G55020
Acepa_018770.p2	upregulated	-
Acepa_024766.p1	upregulated	AT1G62660
Acepa_029033.p1	upregulated	AT3G51000
Acepa_041097.p1	upregulated	AT4G39330
Acepa_081789.p2	upregulated	-
Acepa_009357.p1	upregulated	-
Acepa_041060.p1	upregulated	AT1G62660
Acepa_021159.p1	upregulated	AT2G28590
Acepa_012131.p1	upregulated	AT1G34040
Acepa_036989.p1	upregulated	AT4G30210
Acepa_075802.p1	upregulated	AT5G06860
Acepa_083228.p1	upregulated	AT1G62940
Acepa_062602.p1	upregulated	-
Acepa_019161.p1	upregulated	AT5G02290
Acepa_025062.p1	upregulated	AT4G39830
Acepa_012941.p1	upregulated	-
Acepa_053492.p1	upregulated	-
Acepa_058364.p1	upregulated	AT1G76680
Acepa_041085.p1	upregulated	AT1G68570
Acepa_102134.p1	upregulated	AT3G59970
Acepa_047793.p1	upregulated	AT4G13510
Acepa_081584.p1	upregulated	AT2G44480
Acepa_097910.p2	upregulated	AT4G02800
Acepa_029691.p1	upregulated	AT1G76690
Acepa_079798.p1	upregulated	-
Acepa_023834.p1	upregulated	AT5G12080
Acepa_034608.p1	upregulated	AT2G44480
Acepa_083670.p1	upregulated	AT5G48930
Acepa_093711.p1	upregulated	AT1G08230
Acepa_102599.p1	upregulated	-
Acepa_079797.p2	upregulated	-
Acepa_040310.p1	upregulated	-
Acepa_070733.p1	upregulated	AT4G33200
Acepa_099600.p1	upregulated	-
Acepa_059132.p2	upregulated	-
Acepa_070578.p2	upregulated	AT1G32100
Acepa_048979.p1	upregulated	AT1G02850
Acepa_015609.p1	upregulated	AT3G22142
Acepa_033185.p1	upregulated	AT4G21020
Acepa_067452.p1	upregulated	AT1G68570
Acepa_067374.p1	upregulated	AT1G56150
Acepa_027404.p1	upregulated	AT1G19640
Acepa_067378.p1	upregulated	AT5G13330
Acepa_072744.p1	upregulated	AT1G76570
Acepa_068746.p1	upregulated	AT3G20390
Acepa_075997.p1	upregulated	AT5G06060
Acepa_015985.p1	upregulated	AT4G39330
Acepa_078650.p1	upregulated	AT1G68750
Acepa_022886.p1	upregulated	AT2G24490
Acepa_030858.p1	upregulated	AT5G16440
Acepa_025133.p1	upregulated	AT4G23160
Acepa_021158.p1	upregulated	AT2G45750
Acepa_017478.p1	upregulated	AT5G48930
Acepa_096797.p1	upregulated	AT3G54320
Acepa_031646.p1	upregulated	AT4G11600
Acepa_095423.p1	upregulated	AT4G25260
Acepa_095045.p1	upregulated	AT4G25830
Acepa_096603.p1	upregulated	AT1G32100
Acepa_102805.p1	upregulated	AT3G28580
Acepa_060689.p1	upregulated	AT1G69790
Acepa_010528.p1	upregulated	AT4G37360
Acepa_025858.p1	upregulated	AT1G12240
Acepa_016055.p1	upregulated	AT5G53420
Acepa_076396.p1	upregulated	AT4G23160
Acepa_065899.p1	upregulated	AT2G46490
Acepa_009133.p1	upregulated	AT4G39490
Acepa_101477.p1	upregulated	AT1G35250
Acepa_038507.p1	upregulated	AT1G76680
Acepa_069442.p1	upregulated	AT1G21280
Acepa_081169.p1	upregulated	AT3G28580
Acepa_094754.p1	upregulated	AT5G39210
Acepa_024053.p1	upregulated	AT4G34640
Acepa_033033.p2	upregulated	ATMG01250
Acepa_051681.p1	upregulated	AT1G77330
Acepa_038350.p1	upregulated	AT2G01050
Acepa_038591.p1	upregulated	AT2G44480
Acepa_079473.p1	upregulated	AT2G38290
Acepa_012341.p1	upregulated	AT2G35060
Acepa_074489.p1	upregulated	AT3G59220
Acepa_014661.p1	upregulated	AT4G02800
Acepa_097943.p1	upregulated	-
Acepa_039942.p1	upregulated	AT1G55020
Acepa_101911.p1	upregulated	AT4G24520
Acepa_019607.p1	upregulated	AT1G74030
Acepa_101343.p1	upregulated	AT3G20390
Acepa_033203.p1	upregulated	AT5G07480
Acepa_047903.p2	upregulated	AT3G23550
Acepa_076056.p1	upregulated	AT2G25770
Acepa_028689.p1	upregulated	AT1G55320
Acepa_039596.p1	upregulated	AT1G55020
Acepa_052395.p1	upregulated	-
Acepa_081108.p1	upregulated	AT5G28010
Acepa_029694.p1	upregulated	AT1G76690
Acepa_008859.p1	upregulated	AT5G10770
Acepa_024052.p1	upregulated	AT4G34640
Acepa_042313.p1	upregulated	AT1G55020
Acepa_098058.p1	upregulated	AT5G06720
Acepa_036933.p1	upregulated	AT3G60160
Acepa_046390.p1	upregulated	AT1G48590
Acepa_103036.p1	upregulated	AT3G02100
Acepa_037634.p1	upregulated	AT2G46960
Acepa_098102.p1	upregulated	AT5G42170
Acepa_030859.p1	upregulated	AT5G16440
Acepa_036384.p1	upregulated	AT4G37320
Acepa_039439.p1	upregulated	-
Acepa_030499.p1	upregulated	AT2G22880
Acepa_085163.p1	upregulated	AT5G67020
Acepa_067608.p1	upregulated	-
Acepa_018263.p1	upregulated	AT2G32530
Acepa_010932.p1	upregulated	AT1G22400
Acepa_025859.p1	upregulated	AT1G62660
Acepa_043916.p1	upregulated	-
Acepa_040645.p1	upregulated	-
Acepa_025708.p1	upregulated	AT4G32940
Acepa_037599.p1	upregulated	AT2G33380
Acepa_064744.p2	upregulated	-
Acepa_064237.p1	upregulated	AT1G30190
Acepa_038083.p1	upregulated	AT2G46960
Acepa_016750.p1	upregulated	AT2G23610
Acepa_094070.p1	upregulated	AT3G19630
Acepa_042470.p2	upregulated	AT1G12240
Acepa_078465.p1	upregulated	AT1G58420
Acepa_037163.p1	upregulated	AT1G55020
Acepa_077175.p1	upregulated	AT2G33380
Acepa_056005.p1	upregulated	-
Acepa_101888.p1	downregulated	-
Acepa_071777.p2	downregulated	-
Acepa_101296.p1	downregulated	-
Acepa_045919.p1	downregulated	-
Acepa_061091.p1	downregulated	-
Acepa_017948.p1	downregulated	AT4G23160
Acepa_107844.p1	downregulated	AT1G76650
Acepa_078239.p1	downregulated	AT1G62660
Acepa_015384.p1	downregulated	AT1G43760
Acepa_078330.p1	downregulated	AT3G13750
Acepa_061092.p1	downregulated	-
Acepa_012369.p2	downregulated	AT2G13620
Acepa_026912.p1	downregulated	AT5G63160
Acepa_051872.p1	downregulated	AT1G02640
Acepa_048482.p1	downregulated	AT2G29990
Acepa_049012.p2	downregulated	AT5G02020
Acepa_011641.p1	downregulated	AT5G03860
Acepa_011643.p1	downregulated	AT5G03860
Acepa_068995.p1	downregulated	AT5G08790
Acepa_076034.p1	downregulated	AT3G11180
Acepa_021788.p1	downregulated	-
Acepa_096878.p1	downregulated	AT5G57850
Acepa_083817.p1	downregulated	AT5G22920
Acepa_012431.p1	downregulated	AT3G20790
Acepa_035215.p1	downregulated	AT5G63800
Acepa_026910.p1	downregulated	AT5G63160
Acepa_097080.p1	downregulated	ATMG01250
Acepa_013333.p1	downregulated	-
Acepa_069647.p1	downregulated	AT3G24255
Acepa_048481.p1	downregulated	AT2G29990
Acepa_077967.p1	downregulated	AT1G10500
Acepa_081220.p1	downregulated	AT2G24210
Acepa_085159.p1	downregulated	AT3G45970
Acepa_035880.p1	downregulated	AT3G13750
Acepa_005596.p1	downregulated	AT3G49470
Acepa_005847.p1	downregulated	AT4G23160
Acepa_022902.p1	downregulated	AT3G25440
Acepa_099111.p1	downregulated	AT4G32480
Acepa_009700.p1	downregulated	AT5G44680
Acepa_042378.p1	downregulated	AT4G33010
Acepa_020504.p1	downregulated	AT3G24255
Acepa_036981.p1	downregulated	AT1G79730
Acepa_055107.p1	downregulated	AT3G46780
Acepa_080565.p1	downregulated	AT1G12240
Acepa_014592.p1	downregulated	AT4G12690
Acepa_075702.p2	downregulated	AT5G49360
Acepa_092496.p1	downregulated	AT3G48360
Acepa_061353.p1	downregulated	AT4G23160
Acepa_069973.p1	downregulated	-
Acepa_010676.p1	downregulated	AT3G13750
Acepa_009037.p2	downregulated	AT1G62660
Acepa_100650.p1	downregulated	-
Acepa_009701.p1	downregulated	AT5G44680
Acepa_021854.p1	downregulated	AT1G50410
Acepa_031330.p1	downregulated	AT5G40370
Acepa_073332.p1	downregulated	AT3G17450
Acepa_009698.p1	downregulated	AT5G44680
Acepa_102279.p1	downregulated	AT1G03090
Acepa_048485.p1	downregulated	AT2G29990
Acepa_019265.p1	downregulated	ATMG00300
Acepa_072831.p1	downregulated	-
Acepa_011384.p1	downregulated	AT4G27450
Acepa_059417.p1	downregulated	AT3G24255
Acepa_024505.p1	downregulated	-
Acepa_019838.p1	downregulated	AT1G02640
Acepa_014109.p1	downregulated	AT2G34140
Acepa_053094.p2	downregulated	AT1G22370
Acepa_014919.p1	downregulated	-
Acepa_100424.p1	downregulated	AT3G52990
Acepa_033406.p1	downregulated	-
Acepa_077969.p1	downregulated	AT1G10500
Acepa_017855.p1	downregulated	AT1G18620
Acepa_050548.p1	downregulated	AT4G23160
Acepa_011383.p1	downregulated	AT3G15450
Acepa_076777.p1	downregulated	-
Acepa_078234.p1	downregulated	AT1G62660
Acepa_072492.p1	downregulated	AT1G78080
Acepa_099024.p1	downregulated	-
Acepa_059426.p1	downregulated	AT1G17870
Acepa_069974.p1	downregulated	-
Acepa_083931.p3	downregulated	-
Acepa_109042.p1	downregulated	-
Acepa_066388.p1	downregulated	-
Acepa_061127.p2	downregulated	AT5G24950
Acepa_102315.p1	downregulated	AT5G63800
Acepa_011644.p1	downregulated	AT5G03860
Acepa_009866.p1	downregulated	-
Acepa_096245.p1	downregulated	AT3G47340
Acepa_018806.p1	downregulated	AT2G40610
Acepa_065463.p1	downregulated	AT3G02885
Acepa_057803.p2	downregulated	-
Acepa_051873.p2	downregulated	AT1G02640
Acepa_095067.p1	downregulated	AT2G46400
Acepa_010678.p1	downregulated	AT3G13750
Acepa_098653.p1	downregulated	AT1G05910
Acepa_025877.p1	downregulated	AT3G24255
Acepa_090813.p1	downregulated	-
Acepa_048201.p1	downregulated	-
Acepa_107757.p2	downregulated	-
Acepa_015951.p1	downregulated	AT1G12240
Acepa_089787.p2	downregulated	-
Acepa_057808.p1	downregulated	-
Acepa_012925.p1	downregulated	-
Acepa_096244.p1	downregulated	AT3G47340
Acepa_012368.p3	downregulated	AT1G18620
Acepa_100385.p1	downregulated	AT4G33010
Acepa_027006.p1	downregulated	AT3G16720
Acepa_047354.p1	downregulated	AT3G07340
Acepa_100806.p1	downregulated	AT3G05420
Acepa_057671.p1	downregulated	-
Acepa_067821.p1	downregulated	-
Acepa_100626.p1	downregulated	-

## Sheet: Asia-24 0 hpi vs 32 hpi
Gene ID	DE results	TAIR ID			GO annotatied transcripts
Acepa_039132.p1	upregulated	AT1G55020			Response to stress	Response to biotic stimulus
Acepa_006519.p1	upregulated	AT5G59870		Upregulated transcripts	79	36
Acepa_027380.p1	upregulated	AT3G12170		Downregulated transcripts	14	4
Acepa_100990.p1	upregulated	AT1G77330
Acepa_086553.p1	upregulated	-
Acepa_051728.p1	upregulated	AT5G65780
Acepa_047449.p1	upregulated	AT1G08050
Acepa_000089.p1	upregulated	AT4G28310
Acepa_018543.p1	upregulated	AT2G40330
Acepa_026160.p1	upregulated	AT2G17070
Acepa_042555.p1	upregulated	AT1G67630
Acepa_103602.p1	upregulated	AT3G19000
Acepa_084092.p1	upregulated	AT1G79560
Acepa_051998.p1	upregulated	AT2G01050
Acepa_032882.p1	upregulated	AT2G32300
Acepa_020274.p1	upregulated	AT4G05220
Acepa_031392.p1	upregulated	AT2G37430
Acepa_038053.p1	upregulated	AT2G40550
Acepa_040417.p1	upregulated	AT4G20520
Acepa_099683.p1	upregulated	AT2G46960
Acepa_072185.p1	upregulated	AT4G11600
Acepa_048901.p1	upregulated	AT5G08170
Acepa_037094.p1	upregulated	ATMG01250
Acepa_010486.p1	upregulated	AT5G03300
Acepa_048973.p1	upregulated	AT1G54970
Acepa_019163.p1	upregulated	AT5G02290
Acepa_034767.p1	upregulated	AT5G17920
Acepa_060215.p2	upregulated	-
Acepa_055868.p2	upregulated	AT3G26300
Acepa_040066.p1	upregulated	AT2G42320
Acepa_041753.p1	upregulated	AT5G41880
Acepa_040781.p1	upregulated	AT3G18170
Acepa_015947.p1	upregulated	AT3G22600
Acepa_097139.p1	upregulated	AT1G68280
Acepa_079567.p1	upregulated	AT2G27660
Acepa_047904.p1	upregulated	AT3G23560
Acepa_074928.p2	upregulated	AT1G10070
Acepa_012126.p1	upregulated	AT3G12145
Acepa_012497.p1	upregulated	AT1G56430
Acepa_011986.p1	upregulated	AT3G05740
Acepa_087182.p1	upregulated	AT5G19040
Acepa_012056.p1	upregulated	AT4G28590
Acepa_012495.p1	upregulated	AT1G56430
Acepa_070293.p1	upregulated	AT3G63540
Acepa_043078.p1	upregulated	AT1G55020
Acepa_068770.p1	upregulated	AT2G41480
Acepa_035566.p1	upregulated	AT1G67320
Acepa_032176.p1	upregulated	AT1G05010
Acepa_081618.p1	upregulated	AT2G47140
Acepa_018210.p1	upregulated	-
Acepa_022180.p1	upregulated	-
Acepa_010488.p1	upregulated	AT5G03300
Acepa_056072.p1	upregulated	AT5G06860
Acepa_019162.p1	upregulated	AT4G35600
Acepa_058196.p1	upregulated	AT2G47140
Acepa_076448.p1	upregulated	AT1G17710
Acepa_105649.p1	upregulated	AT5G44210
Acepa_100849.p1	upregulated	AT5G03300
Acepa_097661.p1	upregulated	-
Acepa_000909.p1	upregulated	AT4G07960
Acepa_032923.p1	upregulated	AT5G36910
Acepa_041691.p1	upregulated	AT2G20340
Acepa_102052.p1	upregulated	AT2G20340
Acepa_096445.p1	upregulated	-
Acepa_041732.p1	upregulated	AT5G11880
Acepa_013354.p1	upregulated	AT1G23200
Acepa_053092.p1	upregulated	AT2G20340
Acepa_095241.p1	upregulated	AT5G46800
Acepa_072204.p1	upregulated	AT3G23250
Acepa_023652.p1	upregulated	-
Acepa_034888.p1	upregulated	AT5G23660
Acepa_024279.p1	upregulated	AT5G54160
Acepa_025178.p1	upregulated	AT5G50200
Acepa_082646.p1	upregulated	-
Acepa_039496.p2	upregulated	AT1G21310
Acepa_022405.p1	upregulated	AT4G36220
Acepa_037350.p1	upregulated	AT5G13750
Acepa_027844.p1	upregulated	AT5G06860
Acepa_035460.p3	upregulated	AT1G23200
Acepa_051999.p1	upregulated	-
Acepa_014448.p1	upregulated	AT1G08250
Acepa_069186.p1	upregulated	AT1G08880
Acepa_035197.p1	upregulated	AT4G39490
Acepa_071727.p1	upregulated	AT5G06720
Acepa_029742.p1	upregulated	AT1G56600
Acepa_031663.p1	upregulated	AT2G39980
Acepa_039519.p1	upregulated	AT5G23420
Acepa_060214.p1	upregulated	-
Acepa_050406.p1	upregulated	AT3G47570
Acepa_023533.p1	upregulated	AT4G35160
Acepa_034637.p1	upregulated	AT1G55020
Acepa_077623.p1	upregulated	AT2G35980
Acepa_035459.p1	upregulated	AT1G62660
Acepa_092483.p1	upregulated	AT2G32300
Acepa_021821.p1	upregulated	-
Acepa_072924.p1	upregulated	AT1G22360
Acepa_053608.p1	upregulated	AT1G68750
Acepa_020651.p1	upregulated	AT3G30180
Acepa_092112.p1	upregulated	-
Acepa_010484.p1	upregulated	AT5G03300
Acepa_024138.p1	upregulated	AT2G46630
Acepa_036954.p1	upregulated	AT3G42170
Acepa_043800.p1	upregulated	AT1G59960
Acepa_031267.p1	upregulated	AT1G24540
Acepa_046270.p1	upregulated	-
Acepa_034223.p1	upregulated	AT1G76680
Acepa_036984.p1	upregulated	AT1G55020
Acepa_058195.p1	upregulated	AT2G47140
Acepa_077621.p1	upregulated	AT2G35980
Acepa_014662.p1	upregulated	AT4G02800
Acepa_023644.p2	upregulated	-
Acepa_094069.p1	upregulated	AT3G19630
Acepa_025860.p1	upregulated	AT1G12240
Acepa_015533.p1	upregulated	-
Acepa_080632.p1	upregulated	AT3G12500
Acepa_060916.p1	upregulated	-
Acepa_037902.p1	upregulated	-
Acepa_042503.p1	upregulated	AT2G37790
Acepa_018544.p1	upregulated	AT2G40330
Acepa_029691.p1	upregulated	AT1G76690
Acepa_015609.p1	upregulated	AT3G22142
Acepa_096746.p1	upregulated	AT5G28010
Acepa_035567.p1	upregulated	AT1G76680
Acepa_056073.p1	upregulated	AT5G06860
Acepa_021905.p1	upregulated	AT5G48050
Acepa_048396.p1	upregulated	AT5G48290
Acepa_046671.p1	upregulated	AT3G20015
Acepa_016569.p1	upregulated	AT2G44500
Acepa_079479.p1	upregulated	-
Acepa_011097.p1	upregulated	AT5G17920
Acepa_035241.p1	upregulated	AT3G52990
Acepa_040591.p1	upregulated	AT1G55020
Acepa_068481.p1	upregulated	AT2G18969
Acepa_067608.p1	upregulated	-
Acepa_042767.p1	upregulated	AT5G46280
Acepa_055961.p1	upregulated	AT1G76810
Acepa_052077.p1	upregulated	AT2G38290
Acepa_032301.p1	upregulated	AT5G50260
Acepa_040229.p2	upregulated	AT1G02205
Acepa_078769.p1	upregulated	AT2G35660
Acepa_083122.p1	upregulated	AT1G34060
Acepa_034477.p1	upregulated	AT4G19020
Acepa_035778.p1	upregulated	AT2G32530
Acepa_023653.p1	upregulated	AT1G24020
Acepa_041966.p1	upregulated	AT1G50410
Acepa_036160.p1	upregulated	AT1G12240
Acepa_083120.p1	upregulated	AT1G34060
Acepa_034127.p1	upregulated	AT4G08770
Acepa_037223.p1	upregulated	AT1G02205
Acepa_039239.p1	upregulated	AT5G45280
Acepa_039031.p2	upregulated	AT3G54700
Acepa_081170.p1	upregulated	AT3G28580
Acepa_076061.p1	upregulated	AT1G49670
Acepa_022406.p1	upregulated	AT4G36220
Acepa_016713.p1	upregulated	AT5G05320
Acepa_053577.p1	upregulated	AT5G04370
Acepa_050631.p1	upregulated	AT5G05340
Acepa_046350.p1	upregulated	AT2G26640
Acepa_068769.p1	upregulated	AT2G41480
Acepa_042132.p1	upregulated	AT1G55020
Acepa_021863.p1	upregulated	AT2G15325
Acepa_037764.p1	upregulated	AT1G12240
Acepa_024277.p1	upregulated	AT5G54160
Acepa_076761.p3	upregulated	AT3G15470
Acepa_100906.p1	upregulated	AT4G05020
Acepa_012674.p1	upregulated	AT1G54730
Acepa_076975.p1	upregulated	AT4G00430
Acepa_018970.p1	upregulated	AT4G01870
Acepa_073992.p1	upregulated	AT4G14746
Acepa_035193.p2	upregulated	-
Acepa_016598.p1	upregulated	AT3G17470
Acepa_081178.p1	upregulated	AT5G50200
Acepa_019614.p1	upregulated	AT1G72970
Acepa_039818.p1	upregulated	AT5G66750
Acepa_070639.p1	upregulated	AT3G04720
Acepa_009592.p1	upregulated	AT1G43760
Acepa_040971.p1	upregulated	AT2G25770
Acepa_032727.p1	upregulated	-
Acepa_036374.p1	upregulated	AT3G24255
Acepa_020554.p1	upregulated	AT1G20960
Acepa_053090.p1	upregulated	AT2G20340
Acepa_066361.p1	upregulated	AT1G10550
Acepa_040491.p1	upregulated	AT1G21310
Acepa_082311.p1	upregulated	AT5G64950
Acepa_020653.p1	upregulated	AT3G30180
Acepa_031920.p1	upregulated	AT4G33720
Acepa_030812.p1	upregulated	-
Acepa_045793.p1	upregulated	AT1G75750
Acepa_017960.p1	upregulated	-
Acepa_037451.p1	upregulated	AT1G12240
Acepa_074228.p1	upregulated	-
Acepa_011906.p1	upregulated	-
Acepa_031059.p1	upregulated	AT3G14420
Acepa_005650.p1	upregulated	AT5G50200
Acepa_074409.p1	upregulated	-
Acepa_009078.p1	upregulated	AT5G28840
Acepa_052393.p1	upregulated	AT3G48360
Acepa_023532.p1	upregulated	AT4G35160
Acepa_069661.p1	upregulated	-
Acepa_044353.p2	upregulated	AT5G05365
Acepa_034949.p1	upregulated	AT1G22400
Acepa_032881.p1	upregulated	AT3G24255
Acepa_010135.p1	upregulated	AT3G21865
Acepa_037176.p1	upregulated	AT5G65360
Acepa_056931.p1	upregulated	AT5G56530
Acepa_036655.p1	upregulated	AT1G12240
Acepa_029793.p2	upregulated	AT4G15020
Acepa_080656.p1	upregulated	AT3G22850
Acepa_006522.p1	upregulated	AT5G02560
Acepa_057200.p1	upregulated	AT1G53820
Acepa_034684.p1	upregulated	AT2G30490
Acepa_024278.p1	upregulated	AT5G54160
Acepa_057965.p1	upregulated	-
Acepa_022886.p1	upregulated	AT2G24490
Acepa_071566.p1	upregulated	AT4G28310
Acepa_029313.p1	upregulated	AT3G16150
Acepa_059588.p1	upregulated	AT5G12470
Acepa_019161.p1	upregulated	AT5G02290
Acepa_014615.p1	upregulated	AT2G16440
Acepa_098329.p1	upregulated	AT5G67310
Acepa_058364.p1	upregulated	AT1G76680
Acepa_018511.p1	upregulated	AT5G18880
Acepa_067920.p1	upregulated	AT3G44220
Acepa_008817.p1	upregulated	AT1G55020
Acepa_046832.p1	upregulated	-
Acepa_025863.p1	upregulated	AT1G12240
Acepa_039217.p1	upregulated	AT3G16520
Acepa_023010.p1	upregulated	AT4G37340
Acepa_033050.p1	upregulated	-
Acepa_033829.p1	upregulated	AT1G76680
Acepa_077838.p1	upregulated	AT3G47570
Acepa_069764.p1	upregulated	AT4G25830
Acepa_032435.p1	upregulated	AT5G20060
Acepa_040439.p1	upregulated	AT1G12240
Acepa_049543.p1	upregulated	AT4G13080
Acepa_073247.p1	upregulated	-
Acepa_041308.p1	upregulated	AT1G10070
Acepa_060064.p1	upregulated	AT5G47020
Acepa_042369.p1	upregulated	AT5G11880
Acepa_029033.p1	upregulated	AT3G51000
Acepa_018770.p2	upregulated	-
Acepa_029315.p1	upregulated	AT3G16150
Acepa_004827.p1	upregulated	AT5G24330
Acepa_024766.p1	upregulated	AT1G62660
Acepa_035894.p2	upregulated	-
Acepa_041095.p1	upregulated	AT1G60220
Acepa_040846.p1	upregulated	AT5G17920
Acepa_051685.p1	upregulated	AT1G77330
Acepa_008818.p1	upregulated	AT1G55020
Acepa_041097.p1	upregulated	AT4G39330
Acepa_009357.p1	upregulated	-
Acepa_081789.p2	upregulated	-
Acepa_104274.p1	upregulated	AT1G23200
Acepa_041060.p1	upregulated	AT1G62660
Acepa_009077.p1	upregulated	AT2G25770
Acepa_079798.p1	upregulated	-
Acepa_021159.p1	upregulated	AT2G28590
Acepa_018415.p1	upregulated	AT5G06870
Acepa_012131.p1	upregulated	AT1G34040
Acepa_034262.p1	upregulated	AT1G44900
Acepa_095838.p1	upregulated	AT4G25810
Acepa_037519.p1	upregulated	AT4G21700
Acepa_075802.p1	upregulated	AT5G06860
Acepa_028408.p1	upregulated	AT4G16260
Acepa_022682.p1	upregulated	-
Acepa_052399.p1	upregulated	AT5G63160
Acepa_031646.p1	upregulated	AT4G11600
Acepa_007042.p1	upregulated	AT1G14390
Acepa_005244.p1	upregulated	AT1G47230
Acepa_014483.p1	upregulated	AT4G11290
Acepa_047793.p1	upregulated	AT4G13510
Acepa_100907.p1	upregulated	AT4G05020
Acepa_035239.p1	upregulated	AT5G08020
Acepa_019780.p1	upregulated	-
Acepa_013944.p1	upregulated	AT4G13420
Acepa_077792.p1	upregulated	AT4G11290
Acepa_023834.p1	upregulated	AT5G12080
Acepa_016391.p1	upregulated	AT1G32170
Acepa_093711.p1	upregulated	AT1G08230
Acepa_079797.p2	upregulated	-
Acepa_019770.p1	upregulated	AT1G79720
Acepa_040310.p1	upregulated	-
Acepa_099600.p1	upregulated	-
Acepa_026182.p1	upregulated	AT2G15780
Acepa_070578.p2	upregulated	AT1G32100
Acepa_029145.p1	upregulated	AT5G05340
Acepa_058861.p1	upregulated	AT4G27500
Acepa_097269.p1	upregulated	AT5G59870
Acepa_021862.p1	upregulated	AT2G15325
Acepa_067452.p1	upregulated	AT1G68570
Acepa_067374.p1	upregulated	AT1G56150
Acepa_097408.p1	upregulated	AT3G13510
Acepa_066119.p1	upregulated	-
Acepa_025858.p1	upregulated	AT1G12240
Acepa_036989.p1	upregulated	AT4G30210
Acepa_067378.p1	upregulated	AT5G13330
Acepa_050787.p1	upregulated	AT2G29570
Acepa_072744.p1	upregulated	AT1G76570
Acepa_068746.p1	upregulated	AT3G20390
Acepa_095421.p1	upregulated	AT3G54040
Acepa_015985.p1	upregulated	AT4G39330
Acepa_078650.p1	upregulated	AT1G68750
Acepa_048398.p1	upregulated	AT5G48290
Acepa_030500.p1	upregulated	AT2G22880
Acepa_040524.p1	upregulated	AT1G76680
Acepa_025133.p1	upregulated	AT4G23160
Acepa_041499.p1	upregulated	AT5G44635
Acepa_037539.p2	upregulated	ATMG01250
Acepa_097387.p1	upregulated	AT2G32300
Acepa_021158.p1	upregulated	AT2G45750
Acepa_096797.p1	upregulated	AT3G54320
Acepa_012344.p1	upregulated	AT3G14390
Acepa_025062.p1	upregulated	AT4G39830
Acepa_095045.p1	upregulated	AT4G25830
Acepa_096603.p1	upregulated	AT1G32100
Acepa_102805.p1	upregulated	AT3G28580
Acepa_060689.p1	upregulated	AT1G69790
Acepa_010528.p1	upregulated	AT4G37360
Acepa_106623.p1	upregulated	-
Acepa_047448.p1	upregulated	AT5G60710
Acepa_075997.p1	upregulated	AT5G06060
Acepa_069442.p1	upregulated	AT1G21280
Acepa_025620.p1	upregulated	AT3G54710
Acepa_009133.p1	upregulated	AT4G39490
Acepa_101477.p1	upregulated	AT1G35250
Acepa_035605.p1	upregulated	AT5G44640
Acepa_038507.p1	upregulated	AT1G76680
Acepa_065899.p1	upregulated	AT2G46490
Acepa_027843.p1	upregulated	AT5G06860
Acepa_081169.p1	upregulated	AT3G28580
Acepa_055132.p1	upregulated	AT5G54160
Acepa_033033.p2	upregulated	ATMG01250
Acepa_010489.p1	upregulated	AT5G03300
Acepa_051681.p1	upregulated	AT1G77330
Acepa_039610.p1	upregulated	AT2G37040
Acepa_038350.p1	upregulated	AT2G01050
Acepa_036973.p1	upregulated	AT4G32300
Acepa_041543.p2	upregulated	-
Acepa_098102.p1	upregulated	AT5G42170
Acepa_035890.p1	upregulated	AT4G19020
Acepa_074489.p1	upregulated	AT3G59220
Acepa_014661.p1	upregulated	AT4G02800
Acepa_039942.p1	upregulated	AT1G55020
Acepa_039869.p3	upregulated	AT1G21310
Acepa_014217.p1	upregulated	AT5G08640
Acepa_045622.p1	upregulated	AT4G16260
Acepa_101911.p1	upregulated	AT4G24520
Acepa_039143.p1	upregulated	AT4G20520
Acepa_019607.p1	upregulated	AT1G74030
Acepa_101343.p1	upregulated	AT3G20390
Acepa_025166.p1	upregulated	AT5G08020
Acepa_023007.p1	upregulated	AT5G06390
Acepa_047903.p2	upregulated	AT3G23550
Acepa_048888.p1	upregulated	AT2G41380
Acepa_076056.p1	upregulated	AT2G25770
Acepa_099663.p1	upregulated	AT3G21865
Acepa_059450.p1	upregulated	-
Acepa_039596.p1	upregulated	AT1G55020
Acepa_040109.p1	upregulated	AT4G39330
Acepa_028151.p1	upregulated	AT4G27830
Acepa_103385.p1	upregulated	AT4G23160
Acepa_081108.p1	upregulated	AT5G28010
Acepa_029694.p1	upregulated	AT1G76690
Acepa_029028.p1	upregulated	AT4G11290
Acepa_042313.p1	upregulated	AT1G55020
Acepa_098058.p1	upregulated	AT5G06720
Acepa_036933.p1	upregulated	AT3G60160
Acepa_031482.p1	upregulated	AT2G32300
Acepa_077841.p1	upregulated	-
Acepa_046390.p1	upregulated	AT1G48590
Acepa_103036.p1	upregulated	AT3G02100
Acepa_018380.p1	upregulated	-
Acepa_066993.p1	upregulated	AT1G16905
Acepa_026164.p1	upregulated	AT5G25265
Acepa_028605.p1	upregulated	AT1G48280
Acepa_079473.p1	upregulated	AT2G38290
Acepa_012496.p1	upregulated	AT5G04950
Acepa_039439.p1	upregulated	-
Acepa_030499.p1	upregulated	AT2G22880
Acepa_085163.p1	upregulated	AT5G67020
Acepa_040162.p1	upregulated	AT1G07270
Acepa_102134.p1	upregulated	AT3G59970
Acepa_018263.p1	upregulated	AT2G32530
Acepa_010240.p1	upregulated	AT5G65360
Acepa_083670.p1	upregulated	AT5G48930
Acepa_025859.p1	upregulated	AT1G62660
Acepa_033098.p1	upregulated	AT4G20520
Acepa_026809.p1	upregulated	AT3G26310
Acepa_078014.p1	upregulated	AT2G16760
Acepa_073396.p1	upregulated	AT2G41380
Acepa_027842.p1	upregulated	AT5G06860
Acepa_043916.p1	upregulated	-
Acepa_053492.p1	upregulated	-
Acepa_040645.p1	upregulated	-
Acepa_014214.p1	upregulated	AT5G08640
Acepa_079043.p1	upregulated	AT5G06860
Acepa_064237.p1	upregulated	AT1G30190
Acepa_023991.p1	upregulated	AT5G06860
Acepa_059802.p1	upregulated	AT5G60900
Acepa_016750.p1	upregulated	AT2G23610
Acepa_094070.p1	upregulated	AT3G19630
Acepa_042470.p2	upregulated	AT1G12240
Acepa_078465.p1	upregulated	AT1G58420
Acepa_037163.p1	upregulated	AT1G55020
Acepa_038174.p2	upregulated	AT1G76680
Acepa_056005.p1	upregulated	-
Acepa_015384.p1	downregulated	AT1G43760
Acepa_078330.p1	downregulated	AT3G13750
Acepa_032941.p1	downregulated	-
Acepa_049012.p2	downregulated	AT5G02020
Acepa_072118.p1	downregulated	AT5G61350
Acepa_101296.p1	downregulated	-
Acepa_102812.p1	downregulated	AT5G56550
Acepa_035880.p1	downregulated	AT3G13750
Acepa_009104.p1	downregulated	AT5G49730
Acepa_100053.p1	downregulated	-
Acepa_044206.p1	downregulated	AT3G07350
Acepa_015951.p1	downregulated	AT1G12240
Acepa_099111.p1	downregulated	AT4G32480
Acepa_009700.p1	downregulated	AT5G44680
Acepa_067216.p1	downregulated	AT4G00895
Acepa_041081.p1	downregulated	AT2G34430
Acepa_100650.p1	downregulated	-
Acepa_009701.p1	downregulated	AT5G44680
Acepa_037716.p1	downregulated	AT5G02810
Acepa_073332.p1	downregulated	AT3G17450
Acepa_009698.p1	downregulated	AT5G44680
Acepa_011692.p1	downregulated	ATMG00850
Acepa_035995.p1	downregulated	AT1G22770
Acepa_011384.p1	downregulated	AT4G27450
Acepa_018094.p2	downregulated	AT5G28780
Acepa_027006.p1	downregulated	AT3G16720
Acepa_084238.p1	downregulated	AT5G15250
Acepa_053094.p2	downregulated	AT1G22370
Acepa_100424.p1	downregulated	AT3G52990
Acepa_011031.p1	downregulated	AT5G02810
Acepa_011383.p1	downregulated	AT3G15450
Acepa_099024.p1	downregulated	-
Acepa_059426.p1	downregulated	AT1G17870
Acepa_036377.p2	downregulated	AT1G52340
Acepa_107757.p2	downregulated	-
Acepa_036877.p1	downregulated	AT5G02810
Acepa_066388.p1	downregulated	-
Acepa_010676.p1	downregulated	AT3G13750
Acepa_049490.p1	downregulated	AT2G46790
Acepa_009866.p1	downregulated	-
Acepa_014254.p2	downregulated	AT1G75540
Acepa_096245.p1	downregulated	AT3G47340
Acepa_065463.p1	downregulated	AT3G02885
Acepa_041186.p1	downregulated	AT5G02810
Acepa_010678.p1	downregulated	AT3G13750
Acepa_025877.p1	downregulated	AT3G24255
Acepa_039535.p1	downregulated	AT5G10240
Acepa_027171.p1	downregulated	AT1G19180
Acepa_089787.p2	downregulated	-
Acepa_057808.p1	downregulated	-
Acepa_012925.p1	downregulated	-
Acepa_096244.p1	downregulated	AT3G47340
Acepa_100385.p1	downregulated	AT4G33010
Acepa_014255.p1	downregulated	AT1G75540
Acepa_047354.p1	downregulated	AT3G07340
Acepa_010667.p1	downregulated	AT4G27670
Acepa_095753.p1	downregulated	AT5G64170
Acepa_096246.p1	downregulated	AT3G47340
